# Supplementary material for: Network Pharmacology Study and Experimental Confirmation Revealing the Ameliorative Effects of Decursin on Chemotherapy-Induced Alopecia
Source: MDPI journal article supplement (doi:10.3390/ph14111150), 2021-11-11
Supplement: s1 [file s1]

**Table S2.** Gene targets of alopecia derived from GeneCards open database.

| Gene Symbol | Description                                            | Relevance Score |
|-------------|--------------------------------------------------------|-----------------|
| HR          | HR Lysine Demethylase And Nuclear Receptor Corepressor | 83.67           |
| FOXP1       | Forkhead Box N1                                        | 80.41           |
| DCAF17      | DDB1 And CUL4 Associated Factor 17                     | 61.38           |
| VDR         | Vitamin D Receptor                                     | 39.28           |
| AIRE        | Autoimmune Regulator                                   | 38.26           |
| GJA1        | Gap Junction Protein Alpha 1                           | 34.88           |
| LSS         | Lanosterol Synthase                                    | 34.25           |
| MBTPS2      | Membrane Bound Transcription Factor Peptidase, Site 2  | 33.94           |
| RBM28       | RNA Binding Motif Protein 28                           | 30.71           |
| IL2RA       | Interleukin 2 Receptor Subunit Alpha                   | 30.7            |
| KRT83       | Keratin 83                                             | 30.67           |
| DSG4        | Desmoglein 4                                           | 30.56           |
| IL10        | Interleukin 10                                         | 30.3            |
| GJB2        | Gap Junction Protein Beta 2                            | 30.12           |
| AHSG        | Alpha 2-HS Glycoprotein                                | 30.1            |
| LIPH        | Lipase H                                               | 29.78           |
| CTLA4       | Cytotoxic T-Lymphocyte Associated Protein 4            | 29.49           |
| HLA-DRB1    | Major Histocompatibility Complex, Class II, DR Beta 1  | 29.33           |
| PTPN22      | Protein Tyrosine Phosphatase Non-Receptor Type 22      | 29.01           |
| LPAR6       | Lysophosphatidic Acid Receptor 6                       | 28.34           |
| FOXP3       | Forkhead Box P3                                        | 27.89           |
| HLA-B       | Major Histocompatibility Complex, Class I, B           | 27.57           |
| TP63        | Tumor Protein P63                                      | 27.32           |
| ALX4        | ALX Homeobox 4                                         | 26.58           |
| KRT16       | Keratin 16                                             | 26.48           |
| HLA-DQB1    | Major Histocompatibility Complex, Class II, DQ Beta 1  | 26.43           |
| RIN2        | Ras And Rab Interactor 2                               | 26              |
| AA1         | Alopecia Areata 1                                      | 25.43           |
| HOXC13      | Homeobox C13                                           | 25.35           |
| EDNRA       | Endothelin Receptor Type A                             | 25.27           |
| DSP         | Desmoplakin                                            | 25.14           |
| PADI3       | Peptidyl Arginine Deiminase 3                          | 25              |
| KRT14       | Keratin 14                                             | 24.73           |
| GJB4        | Gap Junction Protein Beta 4                            | 24.35           |
| AA2         | Alopecia Areata 2                                      | 24.33           |
| KRT86       | Keratin 86                                             | 24.1            |
| GJB3        | Gap Junction Protein Beta 3                            | 24              |

|          |                                                                     |       |
|----------|---------------------------------------------------------------------|-------|
| HLA-DQA1 | Major Histocompatibility Complex, Class II, DQ Alpha 1              | 23.92 |
| FLG      | Filaggrin                                                           | 23.48 |
| TRPS1    | Transcriptional Repressor GATA Binding 1                            | 23.32 |
| TNFRSF1B | TNF Receptor Superfamily Member 1B                                  | 23.24 |
| KRT74    | Keratin 74                                                          | 22.88 |
| SASH1    | SAM And SH3 Domain Containing 1                                     | 21.7  |
| COL7A1   | Collagen Type VII Alpha 1 Chain                                     | 21.64 |
| EDAR     | Ectodysplasin A Receptor                                            | 20.98 |
| JAK3     | Janus Kinase 3                                                      | 20.66 |
| KRT85    | Keratin 85                                                          | 20.55 |
| LMNA     | Lamin A/C                                                           | 20.5  |
| AR       | Androgen Receptor                                                   | 20.32 |
| AGA2     | Alopecia, Androgenetic, 2                                           | 20.16 |
| AGA3     | Alopecia, Androgenetic, 3                                           | 20.16 |
| IFNG     | Interferon Gamma                                                    | 20    |
| AFA1     | Alopecia, Androgenetic                                              | 19.69 |
| KRT81    | Keratin 81                                                          | 19.61 |
| HTRA1    | HtrA Serine Peptidase 1                                             | 19.37 |
| CASR     | Calcium Sensing Receptor                                            | 19.33 |
| ANTXR1   | ANTXR Cell Adhesion Molecule 1                                      | 19.19 |
| CLDN1    | Claudin 1                                                           | 19.17 |
| TGM1     | Transglutaminase 1                                                  | 18.86 |
| SLC30A2  | Solute Carrier Family 30 Member 2                                   | 18.75 |
| TNF      | Tumor Necrosis Factor                                               | 18.41 |
| BTD      | Biotinidase                                                         | 18.33 |
| GJB6     | Gap Junction Protein Beta 6                                         | 17.84 |
| TRPV3    | Transient Receptor Potential Cation Channel Subfamily V Member 3    | 17.71 |
| WNT10A   | Wnt Family Member 10A                                               | 17.55 |
| IKBKG    | Inhibitor Of Nuclear Factor Kappa B Kinase Regulatory Subunit Gamma | 17.4  |
| SLC39A4  | Solute Carrier Family 39 Member 4                                   | 17.34 |
| IL2      | Interleukin 2                                                       | 17.27 |
| HLA-A    | Major Histocompatibility Complex, Class I, A                        | 16.75 |
| IL4      | Interleukin 4                                                       | 16.75 |
| ULBP3    | UL16 Binding Protein 3                                              | 16.45 |
| EDARADD  | EDAR Associated Death Domain                                        | 15.98 |
| APMR1    | Alopecia-Mental Retardation Syndrome                                | 15.87 |
| NFKB2    | Nuclear Factor Kappa B Subunit 2                                    | 15.81 |
| COL17A1  | Collagen Type XVII Alpha 1 Chain                                    | 15.56 |
| PLEC     | Plectin                                                             | 15.54 |
| TCHH     | Trichohyalin                                                        | 15.43 |

|          |                                                                    |       |
|----------|--------------------------------------------------------------------|-------|
| KLRK1    | Killer Cell Lectin Like Receptor K1                                | 15.38 |
| IL1RN    | Interleukin 1 Receptor Antagonist                                  | 15.36 |
| IL6      | Interleukin 6                                                      | 15.21 |
| SNRPE    | Small Nuclear Ribonucleoprotein Polypeptide E                      | 15.2  |
| STX17    | Syntaxin 17                                                        | 15.18 |
| KRT17    | Keratin 17                                                         | 15.18 |
| SRD5A1   | Steroid 5 Alpha-Reductase 1                                        | 15.18 |
| PHEX     | Phosphate Regulating Endopeptidase Homolog X-Linked                | 14.87 |
| IL1B     | Interleukin 1 Beta                                                 | 14.79 |
| ICOSLG   | Inducible T Cell Costimulator Ligand                               | 14.76 |
| KRT25    | Keratin 25                                                         | 14.74 |
| TTC7A    | Tetratricopeptide Repeat Domain 7A                                 | 14.56 |
| CD28     | CD28 Molecule                                                      | 14.48 |
| DKC1     | Dyskerin Pseudouridine Synthase 1                                  | 14.48 |
| ZMPSTE24 | Zinc Metallopeptidase STE24                                        | 14.48 |
| CD4      | CD4 Molecule                                                       | 14.43 |
| KRT6A    | Keratin 6A                                                         | 14.41 |
| EBP      | EBP Cholesterol Delta-Isomerase                                    | 14.31 |
| IL1A     | Interleukin 1 Alpha                                                | 14.29 |
| JUP      | Junction Plakoglobin                                               | 14.16 |
| CXCL10   | C-X-C Motif Chemokine Ligand 10                                    | 14.13 |
| HLA-C    | Major Histocompatibility Complex, Class I, C                       | 14.08 |
| UQCRCF1  | Ubiquinol-Cytochrome C Reductase, Rieske Iron-Sulfur Polypeptide 1 | 14.07 |
| IL17A    | Interleukin 17A                                                    | 14.03 |
| ADA      | Adenosine Deaminase                                                | 13.87 |
| ALOXE3   | Arachidonate Lipoxygenase 3                                        | 13.87 |
| EPS8L3   | EPS8 Like 3                                                        | 13.87 |
| CERS3    | Ceramide Synthase 3                                                | 13.87 |
| PTPRC    | Protein Tyrosine Phosphatase Receptor Type C                       | 13.77 |
| SRD5A2   | Steroid 5 Alpha-Reductase 2                                        | 13.77 |
| IL18     | Interleukin 18                                                     | 13.71 |
| ITGB4    | Integrin Subunit Beta 4                                            | 13.71 |
| HRAS     | HRas Proto-Oncogene, GTPase                                        | 13.68 |
| IL7R     | Interleukin 7 Receptor                                             | 13.68 |
| KRT6B    | Keratin 6B                                                         | 13.68 |
| SLITRK1  | SLIT And NTRK Like Family Member 1                                 | 13.68 |
| CD8A     | CD8a Molecule                                                      | 13.63 |
| FASLG    | Fas Ligand                                                         | 13.61 |
| SHBG     | Sex Hormone Binding Globulin                                       | 13.56 |
| IL13     | Interleukin 13                                                     | 13.55 |

|          |                                                                   |       |
|----------|-------------------------------------------------------------------|-------|
| CXCL9    | C-X-C Motif Chemokine Ligand 9                                    | 13.52 |
| ICAM1    | Intercellular Adhesion Molecule 1                                 | 13.47 |
| HLCS     | Holocarboxylase Synthetase                                        | 13.41 |
| CYP21A2  | Cytochrome P450 Family 21 Subfamily A Member 2                    | 13.31 |
| LAMA3    | Laminin Subunit Alpha 3                                           | 13.27 |
| ALOX12B  | Arachidonate 12-Lipoxygenase, 12R Type                            | 13.22 |
| PNPLA1   | Patatin Like Phospholipase Domain Containing 1                    | 13.22 |
| CNGA3    | Cyclic Nucleotide Gated Channel Subunit Alpha 3                   | 13.18 |
| KRT2     | Keratin 2                                                         | 13.18 |
| XPA      | XPA, DNA Damage Recognition And Repair Factor                     | 13.04 |
| NECTIN1  | Nectin Cell Adhesion Molecule 1                                   | 13.04 |
| APMR2    | Alopecia With Mental Retardation Syndrome 2                       | 13.03 |
| NOTCH4   | Notch Receptor 4                                                  | 12.86 |
| CDSN     | Corneodesmosin                                                    | 12.84 |
| ATR      | ATR Serine/Threonine Kinase                                       | 12.77 |
| KRT75    | Keratin 75                                                        | 12.74 |
| MICA     | MHC Class I Polypeptide-Related Sequence A                        | 12.63 |
| TPO      | Thyroid Peroxidase                                                | 12.6  |
| FAS      | Fas Cell Surface Death Receptor                                   | 12.57 |
| STAT1    | Signal Transducer And Activator Of Transcription 1                | 12.57 |
| LORICRIN | Loricrin Cornified Envelope Precursor Protein                     | 12.57 |
| STAT4    | Signal Transducer And Activator Of Transcription 4                | 12.54 |
| ABCA12   | ATP Binding Cassette Subfamily A Member 12                        | 12.54 |
| NIPAL4   | NIPA Like Domain Containing 4                                     | 12.54 |
| MIF      | Macrophage Migration Inhibitory Factor                            | 12.51 |
| ITGB6    | Integrin Subunit Beta 6                                           | 12.48 |
| NFKB1    | Nuclear Factor Kappa B Subunit 1                                  | 12.35 |
| KRAS     | KRAS Proto-Oncogene, GTPase                                       | 12.35 |
| LIG4     | DNA Ligase 4                                                      | 12.35 |
| ERCC4    | ERCC Excision Repair 4, Endonuclease Catalytic Subunit            | 12.35 |
| RMRP     | RNA Component Of Mitochondrial RNA Processing<br>Endoribonuclease | 12.35 |
| CXCR3    | C-X-C Motif Chemokine Receptor 3                                  | 12.2  |
| APMR3    | Alopecia-Mental Retardation Syndrome 3                            | 12.19 |
| LAMB3    | Laminin Subunit Beta 3                                            | 12.08 |
| IL1R1    | Interleukin 1 Receptor Type 1                                     | 12.06 |
| CLEC16A  | C-Type Lectin Domain Containing 16A                               | 12.04 |
| CRH      | Corticotropin Releasing Hormone                                   | 12.02 |
| TLR2     | Toll Like Receptor 2                                              | 11.93 |
| METTL8   | Methyltransferase Like 8                                          | 11.92 |
| PRDX5    | Peroxiredoxin 5                                                   | 11.91 |

|         |                                                                     |       |
|---------|---------------------------------------------------------------------|-------|
| TGM3    | Transglutaminase 3                                                  | 11.88 |
| IKZF4   | IKAROS Family Zinc Finger 4                                         | 11.84 |
| NSDHL   | NAD(P) Dependent Steroid Dehydrogenase-Like                         | 11.82 |
| RIPK4   | Receptor Interacting Serine/Threonine Kinase 4                      | 11.75 |
| MC2R    | Melanocortin 2 Receptor                                             | 11.65 |
| ZNF341  | Zinc Finger Protein 341                                             | 11.64 |
| USB1    | U6 SnRNA Biogenesis Phosphodiesterase 1                             | 11.64 |
| RAG2    | Recombination Activating 2                                          | 11.63 |
| FGFR1   | Fibroblast Growth Factor Receptor 1                                 | 11.63 |
| PERP    | P53 Apoptosis Effector Related To PMP22                             | 11.63 |
| RAG1    | Recombination Activating 1                                          | 11.58 |
| DCLRE1C | DNA Cross-Link Repair 1C                                            | 11.58 |
| RECQL4  | RecQ Like Helicase 4                                                | 11.52 |
| CYP19A1 | Cytochrome P450 Family 19 Subfamily A Member 1                      | 11.49 |
| LAMC2   | Laminin Subunit Gamma 2                                             | 11.48 |
| GZMB    | Granzyme B                                                          | 11.44 |
| ERCC1   | ERCC Excision Repair 1, Endonuclease Non-Catalytic Subunit          | 11.43 |
| CYP4F22 | Cytochrome P450 Family 4 Subfamily F Member 22                      | 11.43 |
| SULT2B1 | Sulfotransferase Family 2B Member 1                                 | 11.24 |
| H2AC18  | H2A Clustered Histone 18                                            | 11.24 |
| TLR4    | Toll Like Receptor 4                                                | 11.11 |
| KRT71   | Keratin 71                                                          | 11.07 |
| KLHL24  | Kelch Like Family Member 24                                         | 11.03 |
| IGF1    | Insulin Like Growth Factor 1                                        | 10.91 |
| STS     | Steroid Sulfatase                                                   | 10.91 |
| IL2RG   | Interleukin 2 Receptor Subunit Gamma                                | 10.85 |
| TINF2   | TERF1 Interacting Nuclear Factor 2                                  | 10.85 |
| PKP1    | Plakophilin 1                                                       | 10.83 |
| ALB     | Albumin                                                             | 10.81 |
| PRL     | Prolactin                                                           | 10.81 |
| BCS1L   | BCS1 Homolog, Ubiquinol-Cytochrome C Reductase Complex<br>Chaperone | 10.8  |
| KIT     | KIT Proto-Oncogene, Receptor Tyrosine Kinase                        | 10.66 |
| IL23R   | Interleukin 23 Receptor                                             | 10.66 |
| SPP1    | Secreted Phosphoprotein 1                                           | 10.64 |
| EDA2R   | Ectodysplasin A2 Receptor                                           | 10.6  |
| MMP1    | Matrix Metalloproteinase 1                                          | 10.23 |
| ECM1    | Extracellular Matrix Protein 1                                      | 10.23 |
| CHD7    | Chromodomain Helicase DNA Binding Protein 7                         | 10.19 |
| EDA     | Ectodysplasin A                                                     | 10.14 |
| RAET1L  | Retinoic Acid Early Transcript 1L                                   | 10.13 |

|           |                                                                                                   |       |
|-----------|---------------------------------------------------------------------------------------------------|-------|
| NECTIN4   | Nectin Cell Adhesion Molecule 4                                                                   | 10.07 |
| TGFB2     | Transforming Growth Factor Beta 2                                                                 | 10.01 |
| WNT5A     | Wnt Family Member 5A                                                                              | 10    |
| PEX7      | Peroxisomal Biogenesis Factor 7                                                                   | 10    |
| C4A       | Complement C4A (Rodgers Blood Group)                                                              | 9.96  |
| CCR6      | C-C Motif Chemokine Receptor 6                                                                    | 9.92  |
| SDR9C7    | Short Chain Dehydrogenase/Reductase Family 9C Member 7                                            | 9.92  |
| KDM5C     | Lysine Demethylase 5C                                                                             | 9.88  |
| PORCN     | Porcupine O-Acyltransferase                                                                       | 9.88  |
| APCDD1    | APC Down-Regulated 1                                                                              | 9.86  |
| NOD2      | Nucleotide Binding Oligomerization Domain Containing 2                                            | 9.74  |
| BANF1     | BAF Nuclear Assembly Factor 1                                                                     | 9.74  |
| TNFRSF1A  | TNF Receptor Superfamily Member 1A                                                                | 9.69  |
| XIAP      | X-Linked Inhibitor Of Apoptosis                                                                   | 9.66  |
| RHOA      | Ras Homolog Family Member A                                                                       | 9.65  |
| ERCC2     | ERCC Excision Repair 2, TFIIH Core Complex Helicase Subunit                                       | 9.52  |
| GTF2H5    | General Transcription Factor IIH Subunit 5                                                        | 9.52  |
| LINC00536 | Long Intergenic Non-Protein Coding RNA 536                                                        | 9.47  |
| ADAM10    | ADAM Metallopeptidase Domain 10                                                                   | 9.46  |
| CYP27B1   | Cytochrome P450 Family 27 Subfamily B Member 1                                                    | 9.43  |
| KRT15     | Keratin 15                                                                                        | 9.39  |
| SMARCA2   | SWI/SNF Related, Matrix Associated, Actin Dependent Regulator Of Chromatin, Subfamily A, Member 2 | 9.38  |
| JAK1      | Janus Kinase 1                                                                                    | 9.3   |
| CFLAR     | CASP8 And FADD Like Apoptosis Regulator                                                           | 9.19  |
| LCOR      | Ligand Dependent Nuclear Receptor Corepressor                                                     | 9.11  |
| LBR       | Lamin B Receptor                                                                                  | 9.08  |
| HLA-DRA   | Major Histocompatibility Complex, Class II, DR Alpha                                              | 9.06  |
| ABHD5     | Abhydrolase Domain Containing 5, Lysophosphatidic Acid Acyltransferase                            | 9.06  |
| FAM111B   | Family With Sequence Similarity 111 Member B                                                      | 9.06  |
| GNAS      | GNAS Complex Locus                                                                                | 8.89  |
| ITGAM     | Integrin Subunit Alpha M                                                                          | 8.89  |
| ST14      | ST14 Transmembrane Serine Protease Matriptase                                                     | 8.89  |
| GJB5      | Gap Junction Protein Beta 5                                                                       | 8.89  |
| ECTD6     | Ectodermal Dysplasia 6, Hair/Nail Type                                                            | 8.89  |
| CDH15     | Cadherin 15                                                                                       | 8.66  |
| WDR11     | WD Repeat Domain 11                                                                               | 8.66  |
| INS       | Insulin                                                                                           | 8.62  |
| ERCC3     | ERCC Excision Repair 3, TFIIH Core Complex Helicase Subunit                                       | 8.45  |
| RNF113A   | Ring Finger Protein 113A                                                                          | 8.45  |
| MPLKIP    | M-Phase Specific PLK1 Interacting Protein                                                         | 8.45  |

|          |                                                                        |      |
|----------|------------------------------------------------------------------------|------|
| SCP2     | Sterol Carrier Protein 2                                               | 8.43 |
| IFNA1    | Interferon Alpha 1                                                     | 8.23 |
| IL5      | Interleukin 5                                                          | 8.19 |
| CSN1S1   | Casein Alpha S1                                                        | 8.19 |
| CD40LG   | CD40 Ligand                                                            | 8.14 |
| LIPN     | Lipase Family Member N                                                 | 8.14 |
| AUTS2    | Activator Of Transcription And Developmental Regulator AUTS2           | 8.11 |
| NOTCH1   | Notch Receptor 1                                                       | 8    |
| TERT     | Telomerase Reverse Transcriptase                                       | 8    |
| NRAS     | NRAS Proto-Oncogene, GTPase                                            | 8    |
| GNA11    | G Protein Subunit Alpha 11                                             | 8    |
| BMP2     | Bone Morphogenetic Protein 2                                           | 8    |
| ERCC5    | ERCC Excision Repair 5, Endonuclease                                   | 8    |
| UROD     | Uroporphyrinogen Decarboxylase                                         | 8    |
| MCCC2    | Methylcrotonoyl-CoA Carboxylase 2                                      | 8    |
| HFE      | Homeostatic Iron Regulator                                             | 8    |
| RPL21    | Ribosomal Protein L21                                                  | 8    |
| KDSR     | 3-Ketodihydrosphingosine Reductase                                     | 8    |
| ARHGAP31 | Rho GTPase Activating Protein 31                                       | 8    |
| SOX18    | SRY-Box Transcription Factor 18                                        | 8    |
| DOCK6    | Dedicator Of Cytokinesis 6                                             | 8    |
| TERC     | Telomerase RNA Component                                               | 8    |
| FGFR3    | Fibroblast Growth Factor Receptor 3                                    | 7.95 |
| PIK3CA   | Phosphatidylinositol-4,5-Bisphosphate 3-Kinase Catalytic Subunit Alpha | 7.95 |
| TNFAIP3  | TNF Alpha Induced Protein 3                                            | 7.95 |
| FCGR3B   | Fc Fragment Of IgG Receptor IIIb                                       | 7.95 |
| IL17F    | Interleukin 17F                                                        | 7.95 |
| DCAF8    | DDB1 And CUL4 Associated Factor 8                                      | 7.95 |
| MIR155   | MicroRNA 155                                                           | 7.95 |
| MUHH2    | Hypotrichosis, Hereditary, Marie Unna Type, 2                          | 7.95 |
| TARDBP   | TAR DNA Binding Protein                                                | 7.9  |
| PPARG    | Peroxisome Proliferator Activated Receptor Gamma                       | 7.86 |
| CTNNB1   | Catenin Beta 1                                                         | 7.7  |
| GRK5     | G Protein-Coupled Receptor Kinase 5                                    | 7.7  |
| SQLE     | Squalene Epoxidase                                                     | 7.7  |
| TIMM8A   | Translocase Of Inner Mitochondrial Membrane 8A                         | 7.7  |
| GCAT     | Glycine C-Acetyltransferase                                            | 7.7  |
| PPIC     | Peptidylprolyl Isomerase C                                             | 7.7  |
| LDHD     | Lactate Dehydrogenase D                                                | 7.7  |
| PTCRA    | Pre T Cell Antigen Receptor Alpha                                      | 7.7  |

|         |                                                                 |      |
|---------|-----------------------------------------------------------------|------|
| IFRD2   | Interferon Related Developmental Regulator 2                    | 7.7  |
| CASS4   | Cas Scaffold Protein Family Member 4                            | 7.7  |
| TXLNG   | Taxilin Gamma                                                   | 7.7  |
| LPP     | LIM Domain Containing Preferred Translocation Partner In Lipoma | 7.69 |
| IVL     | Involucrin                                                      | 7.67 |
| PARN    | Poly(A)-Specific Ribonuclease                                   | 7.54 |
| CCL2    | C-C Motif Chemokine Ligand 2                                    | 7.49 |
| SOD1    | Superoxide Dismutase 1                                          | 7.46 |
| CD40    | CD40 Molecule                                                   | 7.46 |
| TMPO    | Thymopoietin                                                    | 7.44 |
| KDM4C   | Lysine Demethylase 4C                                           | 7.44 |
| HELLS   | Helicase, Lymphoid Specific                                     | 7.4  |
| IL12A   | Interleukin 12A                                                 | 7.39 |
| CXCL8   | C-X-C Motif Chemokine Ligand 8                                  | 7.2  |
| COL3A1  | Collagen Type III Alpha 1 Chain                                 | 7.19 |
| GTF2E2  | General Transcription Factor IIE Subunit 2                      | 7.19 |
| TARS1   | Threonyl-TRNA Synthetase 1                                      | 7.19 |
| TP53    | Tumor Protein P53                                               | 7.17 |
| CRP     | C-Reactive Protein                                              | 7.17 |
| KLK3    | Kallikrein Related Peptidase 3                                  | 6.93 |
| PNPLA6  | Patatin Like Phospholipase Domain Containing 6                  | 6.92 |
| NUDT15  | Nudix Hydrolase 15                                              | 6.9  |
| IFNGR1  | Interferon Gamma Receptor 1                                     | 6.89 |
| PRKDC   | Protein Kinase, DNA-Activated, Catalytic Subunit                | 6.89 |
| BLM     | BLM RecQ Like Helicase                                          | 6.89 |
| CCR1    | C-C Motif Chemokine Receptor 1                                  | 6.89 |
| BCL10   | BCL10 Immune Signaling Adaptor                                  | 6.89 |
| ERCC6   | ERCC Excision Repair 6, Chromatin Remodeling Factor             | 6.89 |
| PSTPIP1 | Proline-Serine-Threonine Phosphatase Interacting Protein 1      | 6.89 |
| HAMP    | Hepcidin Antimicrobial Peptide                                  | 6.89 |
| IL12RB1 | Interleukin 12 Receptor Subunit Beta 1                          | 6.89 |
| MEFV    | MEFV Innate Immunity Regulator, Pyrin                           | 6.89 |
| PEX5    | Peroxisomal Biogenesis Factor 5                                 | 6.89 |
| C4B     | Complement C4B (Chido Blood Group)                              | 6.89 |
| MIR17   | MicroRNA 17                                                     | 6.89 |
| ARCI7   | Ichthyosis, Congenital, Autosomal Recessive 7                   | 6.89 |
| ECTD5   | Ectodermal Dysplasia 5, Hair/Nail Type                          | 6.89 |
| TGFB1   | Transforming Growth Factor Beta 1                               | 6.83 |
| IFNA2   | Interferon Alpha 2                                              | 6.82 |
| CDKN2A  | Cyclin Dependent Kinase Inhibitor 2A                            | 6.8  |
| WRN     | WRN RecQ Like Helicase                                          | 6.78 |



|          |                                                       |      |
|----------|-------------------------------------------------------|------|
| CARD11   | Caspase Recruitment Domain Family Member 11           | 6.77 |
| SUOX     | Sulfite Oxidase                                       | 6.76 |
| CD80     | CD80 Molecule                                         | 6.76 |
| PRKACA   | Protein Kinase CAMP-Activated Catalytic Subunit Alpha | 6.73 |
| IRAK1    | Interleukin 1 Receptor Associated Kinase 1            | 6.73 |
| FLI1     | Fli-1 Proto-Oncogene, ETS Transcription Factor        | 6.73 |
| ROR2     | Receptor Tyrosine Kinase Like Orphan Receptor 2       | 6.73 |
| FTL      | Ferritin Light Chain                                  | 6.73 |
| DDB2     | Damage Specific DNA Binding Protein 2                 | 6.73 |
| COL18A1  | Collagen Type XVIII Alpha 1 Chain                     | 6.73 |
| DLL4     | Delta Like Canonical Notch Ligand 4                   | 6.73 |
| NHP2     | NHP2 Ribonucleoprotein                                | 6.73 |
| UROS     | Uroporphyrinogen III Synthase                         | 6.73 |
| NXN      | Nucleoredoxin                                         | 6.73 |
| NOP10    | NOP10 Ribonucleoprotein                               | 6.73 |
| RTKL1    | Regulator Of Telomere Elongation Helicase 1           | 6.73 |
| BTNL2    | Butyrophilin Like 2                                   | 6.73 |
| DMXL2    | Dmx Like 2                                            | 6.73 |
| SMAD4    | SMAD Family Member 4                                  | 6.64 |
| NR1H2    | Nuclear Receptor Subfamily 1 Group H Member 2         | 6.64 |
| TNFSF4   | TNF Superfamily Member 4                              | 6.61 |
| STAT3    | Signal Transducer And Activator Of Transcription 3    | 6.59 |
| HSPD1    | Heat Shock Protein Family D (Hsp60) Member 1          | 6.59 |
| ADIPOQ   | Adiponectin, C1Q And Collagen Domain Containing       | 6.59 |
| SERPINA3 | Serpin Family A Member 3                              | 6.59 |
| TNFRSF8  | TNF Receptor Superfamily Member 8                     | 6.59 |
| DACT1    | Dishevelled Binding Antagonist Of Beta Catenin 1      | 6.59 |
| RSPO4    | R-Spondin 4                                           | 6.59 |
| TNFSF13B | TNF Superfamily Member 13b                            | 6.57 |
| TRAC     | T Cell Receptor Alpha Constant                        | 6.55 |
| DKK1     | Dickkopf WNT Signaling Pathway Inhibitor 1            | 6.49 |
| ATM      | ATM Serine/Threonine Kinase                           | 6.47 |
| CSF3     | Colony Stimulating Factor 3                           | 6.47 |
| CCL5     | C-C Motif Chemokine Ligand 5                          | 6.45 |
| ERAP1    | Endoplasmic Reticulum Aminopeptidase 1                | 6.43 |
| ATXN2    | Ataxin 2                                              | 6.43 |
| HNRNPA3  | Heterogeneous Nuclear Ribonucleoprotein A3            | 6.4  |
| ODC1     | Ornithine Decarboxylase 1                             | 6.38 |
| LEP      | Leptin                                                | 6.37 |
| CCL11    | C-C Motif Chemokine Ligand 11                         | 6.37 |
| CCL17    | C-C Motif Chemokine Ligand 17                         | 6.37 |

|           |                                                       |      |
|-----------|-------------------------------------------------------|------|
| ENPP1     | Ectonucleotide Pyrophosphatase/Phosphodiesterase 1    | 6.29 |
| ATP12A    | ATPase H+/K+ Transporting Non-Gastric Alpha2 Subunit  | 6.29 |
| ATP4A     | ATPase H+/K+ Transporting Subunit Alpha               | 6.29 |
| TIA1      | TIA1 Cytotoxic Granule Associated RNA Binding Protein | 6.28 |
| LINC00708 | Long Intergenic Non-Protein Coding RNA 708            | 6.06 |
| SELE      | Selectin E                                            | 6.02 |
| LTA       | Lymphotoxin Alpha                                     | 6.02 |
| PTGDS     | Prostaglandin D2 Synthase                             | 6.01 |
| TWIST2    | Twist Family BHLH Transcription Factor 2              | 6.01 |
| DST       | Dystonin                                              | 6    |
| PTEN      | Phosphatase And Tensin Homolog                        | 5.96 |
| BMPR1A    | Bone Morphogenetic Protein Receptor Type 1A           | 5.96 |
| CD19      | CD19 Molecule                                         | 5.96 |
| PC        | Pyruvate Carboxylase                                  | 5.96 |
| PNPO      | Pyridoxamine 5'-Phosphate Oxidase                     | 5.96 |
| MUTYH     | MutY DNA Glycosylase                                  | 5.96 |
| SLC5A6    | Solute Carrier Family 5 Member 6                      | 5.96 |
| GJC1      | Gap Junction Protein Gamma 1                          | 5.96 |
| IL7       | Interleukin 7                                         | 5.96 |
| GXYLT2    | Glucoside Xylosyltransferase 2                        | 5.96 |
| HECTD4    | HECT Domain E3 Ubiquitin Protein Ligase 4             | 5.96 |
| KRT5      | Keratin 5                                             | 5.94 |
| FBLN5     | Fibulin 5                                             | 5.94 |
| CD86      | CD86 Molecule                                         | 5.94 |
| TLR9      | Toll Like Receptor 9                                  | 5.93 |
| PIK3R1    | Phosphoinositide-3-Kinase Regulatory Subunit 1        | 5.89 |
| POLG      | DNA Polymerase Gamma, Catalytic Subunit               | 5.84 |
| PDCD1     | Programmed Cell Death 1                               | 5.81 |
| VEGFA     | Vascular Endothelial Growth Factor A                  | 5.81 |
| CSF2      | Colony Stimulating Factor 2                           | 5.81 |
| EVC2      | EvC Ciliary Complex Subunit 2                         | 5.81 |
| EVC       | EvC Ciliary Complex Subunit 1                         | 5.81 |
| LEMD3     | LEM Domain Containing 3                               | 5.76 |
| IL21      | Interleukin 21                                        | 5.75 |
| KITLG     | KIT Ligand                                            | 5.71 |
| SLC30A6   | Solute Carrier Family 30 Member 6                     | 5.67 |
| TYK2      | Tyrosine Kinase 2                                     | 5.62 |
| TLR3      | Toll Like Receptor 3                                  | 5.62 |
| BLK       | BLK Proto-Oncogene, Src Family Tyrosine Kinase        | 5.62 |
| STK11     | Serine/Threonine Kinase 11                            | 5.62 |
| IRF5      | Interferon Regulatory Factor 5                        | 5.62 |

|          |                                                   |      |
|----------|---------------------------------------------------|------|
| GJB1     | Gap Junction Protein Beta 1                       | 5.62 |
| LRP1     | LDL Receptor Related Protein 1                    | 5.62 |
| FCGR2B   | Fc Fragment Of IgG Receptor IIb                   | 5.62 |
| EDN1     | Endothelin 1                                      | 5.62 |
| EDN3     | Endothelin 3                                      | 5.62 |
| ENO1     | Enolase 1                                         | 5.62 |
| PTH      | Parathyroid Hormone                               | 5.62 |
| MYH7     | Myosin Heavy Chain 7                              | 5.62 |
| GNAI3    | G Protein Subunit Alpha I3                        | 5.62 |
| SLC40A1  | Solute Carrier Family 40 Member 1                 | 5.62 |
| FCGR2A   | Fc Fragment Of IgG Receptor IIa                   | 5.62 |
| UBE2L3   | Ubiquitin Conjugating Enzyme E2 L3                | 5.62 |
| CR2      | Complement C3d Receptor 2                         | 5.62 |
| TFR2     | Transferrin Receptor 2                            | 5.62 |
| XRCC5    | X-Ray Repair Cross Complementing 5                | 5.62 |
| CSF1     | Colony Stimulating Factor 1                       | 5.62 |
| HAL      | Histidine Ammonia-Lyase                           | 5.62 |
| DOCK8    | Dedicator Of Cytokinesis 8                        | 5.62 |
| SULT1A1  | Sulfotransferase Family 1A Member 1               | 5.62 |
| TREX1    | Three Prime Repair Exonuclease 1                  | 5.62 |
| C9orf72  | C9orf72-SMCR8 Complex Subunit                     | 5.62 |
| DNASE1   | Deoxyribonuclease 1                               | 5.62 |
| CDH17    | Cadherin 17                                       | 5.62 |
| TNIP1    | TNFAIP3 Interacting Protein 1                     | 5.62 |
| AFAP1    | Actin Filament Associated Protein 1               | 5.62 |
| BMS1     | BMS1 Ribosome Biogenesis Factor                   | 5.62 |
| HNRNPH1  | Heterogeneous Nuclear Ribonucleoprotein H1        | 5.62 |
| LGALS4   | Galectin 4                                        | 5.62 |
| PXK      | PX Domain Containing Serine/Threonine Kinase Like | 5.62 |
| BANK1    | B Cell Scaffold Protein With Ankyrin Repeats 1    | 5.62 |
| HNRNPH2  | Heterogeneous Nuclear Ribonucleoprotein H2        | 5.62 |
| TUBA3C   | Tubulin Alpha 3c                                  | 5.62 |
| UBAC2    | UBA Domain Containing 2                           | 5.62 |
| KLRC4    | Killer Cell Lectin Like Receptor C4               | 5.62 |
| KRT33B   | Keratin 33B                                       | 5.62 |
| HJV      | Hemojuvelin BMP Co-Receptor                       | 5.62 |
| TMEM184C | Transmembrane Protein 184C                        | 5.62 |
| KRT28    | Keratin 28                                        | 5.62 |
| PRMT9    | Protein Arginine Methyltransferase 9              | 5.62 |
| CARMIL2  | Capping Protein Regulator And Myosin 1 Linker 2   | 5.62 |
| PEAK3    | PEAK Family Member 3                              | 5.62 |

|           |                                                    |      |
|-----------|----------------------------------------------------|------|
| MIR342    | MicroRNA 342                                       | 5.62 |
| IL12A-AS1 | IL12A Antisense RNA 1                              | 5.62 |
| CANDF1    | Candidiasis, Familial 1                            | 5.62 |
| SOD2      | Superoxide Dismutase 2                             | 5.62 |
| CD34      | CD34 Molecule                                      | 5.56 |
| IL16      | Interleukin 16                                     | 5.49 |
| TLR1      | Toll Like Receptor 1                               | 5.48 |
| EFNA3     | Ephrin A3                                          | 5.48 |
| MX1       | MX Dynamin Like GTPase 1                           | 5.48 |
| CCL4      | C-C Motif Chemokine Ligand 4                       | 5.48 |
| CCL3      | C-C Motif Chemokine Ligand 3                       | 5.48 |
| CD200     | CD200 Molecule                                     | 5.48 |
| ELN       | Elastin                                            | 5.45 |
| KRT1      | Keratin 1                                          | 5.45 |
| IGHE      | Immunoglobulin Heavy Constant Epsilon              | 5.45 |
| ABCD1     | ATP Binding Cassette Subfamily D Member 1          | 5.41 |
| POMC      | Proopiomelanocortin                                | 5.4  |
| IRF4      | Interferon Regulatory Factor 4                     | 5.37 |
| ALMS1     | ALMS1 Centrosome And Basal Body Associated Protein | 5.35 |
| TXNRD2    | Thioredoxin Reductase 2                            | 5.32 |
| FGF5      | Fibroblast Growth Factor 5                         | 5.3  |
| NR3C1     | Nuclear Receptor Subfamily 3 Group C Member 1      | 5.29 |
| DMPK      | DM1 Protein Kinase                                 | 5.27 |
| STUB1     | STIP1 Homology And U-Box Containing Protein 1      | 5.27 |
| OFD1      | OFD1 Centriole And Centriolar Satellite Protein    | 5.27 |
| IL2RB     | Interleukin 2 Receptor Subunit Beta                | 5.26 |
| THRA      | Thyroid Hormone Receptor Alpha                     | 5.26 |
| WAS       | WASP Actin Nucleation Promoting Factor             | 5.26 |
| CD3D      | CD3d Molecule                                      | 5.26 |
| SLC11A1   | Solute Carrier Family 11 Member 1                  | 5.26 |
| ACADS     | Acyl-CoA Dehydrogenase Short Chain                 | 5.26 |
| CD79A     | CD79a Molecule                                     | 5.26 |
| HNRNPA1   | Heterogeneous Nuclear Ribonucleoprotein A1         | 5.26 |
| PCCB      | Propionyl-CoA Carboxylase Subunit Beta             | 5.26 |
| FUS       | FUS RNA Binding Protein                            | 5.26 |
| CD2       | CD2 Molecule                                       | 5.26 |
| TP53BP1   | Tumor Protein P53 Binding Protein 1                | 5.26 |
| SLC39A13  | Solute Carrier Family 39 Member 13                 | 5.26 |
| SLC39A14  | Solute Carrier Family 39 Member 14                 | 5.26 |
| SLC39A8   | Solute Carrier Family 39 Member 8                  | 5.26 |
| PURA      | Purine Rich Element Binding Protein A              | 5.26 |

|          |                                                                 |      |
|----------|-----------------------------------------------------------------|------|
| XRCC4    | X-Ray Repair Cross Complementing 4                              | 5.26 |
| NCL      | Nucleolin                                                       | 5.26 |
| UBQLN2   | Ubiquilin 2                                                     | 5.26 |
| MATR3    | Matrin 3                                                        | 5.26 |
| ERCC8    | ERCC Excision Repair 8, CSA Ubiquitin Ligase Complex Subunit    | 5.26 |
| UNC119   | Unc-119 Lipid Binding Chaperone                                 | 5.26 |
| RANGAP1  | Ran GTPase Activating Protein 1                                 | 5.26 |
| ADARB2   | Adenosine Deaminase RNA Specific B2 (Inactive)                  | 5.26 |
| MADD     | MAP Kinase Activating Death Domain                              | 5.26 |
| MOC51    | Molybdenum Cofactor Synthesis 1                                 | 5.26 |
| IL15     | Interleukin 15                                                  | 5.26 |
| CD7      | CD7 Molecule                                                    | 5.26 |
| SLC39A1  | Solute Carrier Family 39 Member 1                               | 5.26 |
| SUPT4H1  | SPT4 Homolog, DSIF Elongation Factor Subunit                    | 5.26 |
| PDPR     | Pyruvate Dehydrogenase Phosphatase Regulatory Subunit           | 5.26 |
| NAT9     | N-Acetyltransferase 9 (Putative)                                | 5.26 |
| SIGLEC5  | Sialic Acid Binding Ig Like Lectin 5                            | 5.26 |
| PRND     | Prion Like Protein Doppel                                       | 5.26 |
| NUP54    | Nucleoporin 54                                                  | 5.26 |
| TMX2     | Thioredoxin Related Transmembrane Protein 2                     | 5.26 |
| WDR41    | WD Repeat Domain 41                                             | 5.26 |
| CASC3    | CASC3 Exon Junction Complex Subunit                             | 5.26 |
| CRISP1   | Cysteine Rich Secretory Protein 1                               | 5.26 |
| MMD      | Monocyte To Macrophage Differentiation Associated               | 5.26 |
| H2AX     | H2A.X Variant Histone                                           | 5.26 |
| KRT82    | Keratin 82                                                      | 5.26 |
| KRT84    | Keratin 84                                                      | 5.26 |
| SMCR8    | SMCR8-C9orf72 Complex Subunit                                   | 5.26 |
| KRTAP3-1 | Keratin Associated Protein 3-1                                  | 5.26 |
| VSIG8    | V-Set And Immunoglobulin Domain Containing 8                    | 5.26 |
| SNHG28   | Small Nucleolar RNA Host Gene 28                                | 5.26 |
| MTHFR    | Methylenetetrahydrofolate Reductase                             | 5.25 |
| GAPDH    | Glyceraldehyde-3-Phosphate Dehydrogenase                        | 5.25 |
| BGN      | Biglycan                                                        | 5.25 |
| ESR1     | Estrogen Receptor 1                                             | 5.18 |
| ACTB     | Actin Beta                                                      | 5.18 |
| PAX1     | Paired Box 1                                                    | 5.15 |
| CHUK     | Component Of Inhibitor Of Nuclear Factor Kappa B Kinase Complex | 5.12 |
| HLA-DQA2 | Major Histocompatibility Complex, Class II, DQ Alpha 2          | 5.11 |
| BTK      | Bruton Tyrosine Kinase                                          | 5.09 |

|          |                                                                        |      |
|----------|------------------------------------------------------------------------|------|
| ACVR1    | Activin A Receptor Type 1                                              | 5.09 |
| NPM1     | Nucleophosmin 1                                                        | 5.09 |
| FZD2     | Frizzled Class Receptor 2                                              | 5.09 |
| DVL1     | Dishevelled Segment Polarity Protein 1                                 | 5.09 |
| RBPJ     | Recombination Signal Binding Protein For Immunoglobulin Kappa J Region | 5.09 |
| CSTB     | Cystatin B                                                             | 5.09 |
| DVL3     | Dishevelled Segment Polarity Protein 3                                 | 5.09 |
| XPC      | XPC Complex Subunit, DNA Damage Recognition And Repair Factor          | 5.09 |
| AP1B1    | Adaptor Related Protein Complex 1 Subunit Beta 1                       | 5.09 |
| SLC29A3  | Solute Carrier Family 29 Member 3                                      | 5.09 |
| UBR1     | Ubiquitin Protein Ligase E3 Component N-Recognin 1                     | 5.09 |
| MGP      | Matrix Gla Protein                                                     | 5.09 |
| EXOSC2   | Exosome Component 2                                                    | 5.09 |
| WRAP53   | WD Repeat Containing Antisense To TP53                                 | 5.09 |
| AEBP1    | AE Binding Protein 1                                                   | 5.09 |
| EOGT     | EGF Domain Specific O-Linked N-Acetylglucosamine Transferase           | 5.09 |
| CTC1     | CST Telomere Replication Complex Component 1                           | 5.09 |
| RNU4ATAC | RNA, U4atac Small Nuclear (U12-Dependent Splicing)                     | 5.09 |
| CALCA    | Calcitonin Related Polypeptide Alpha                                   | 5.08 |
| APOH     | Apolipoprotein H                                                       | 5.06 |
| IL31RA   | Interleukin 31 Receptor A                                              | 5.06 |
| KRT10    | Keratin 10                                                             | 5.06 |
| SLC30A4  | Solute Carrier Family 30 Member 4                                      | 5.06 |
| SLC39A2  | Solute Carrier Family 39 Member 2                                      | 5.06 |
| CXCL12   | C-X-C Motif Chemokine Ligand 12                                        | 4.94 |
| PTCH2    | Patched 2                                                              | 4.94 |
| FCGR1A   | Fc Fragment Of IgG Receptor Ia                                         | 4.94 |
| DSG1     | Desmoglein 1                                                           | 4.93 |
| CDH3     | Cadherin 3                                                             | 4.88 |
| ZAP70    | Zeta Chain Of T Cell Receptor Associated Protein Kinase 70             | 4.87 |
| SIRT1    | Sirtuin 1                                                              | 4.87 |
| AK2      | Adenylate Kinase 2                                                     | 4.87 |
| CD3G     | CD3g Molecule                                                          | 4.87 |
| CP       | Ceruloplasmin                                                          | 4.87 |
| SH2D1A   | SH2 Domain Containing 1A                                               | 4.87 |
| PNP      | Purine Nucleoside Phosphorylase                                        | 4.87 |
| TLR5     | Toll Like Receptor 5                                                   | 4.87 |
| WNT3A    | Wnt Family Member 3A                                                   | 4.87 |
| GNPAT    | Glyceronephosphate O-Acyltransferase                                   | 4.87 |
| FGF23    | Fibroblast Growth Factor 23                                            | 4.87 |

|           |                                              |      |
|-----------|----------------------------------------------|------|
| LAMA1     | Laminin Subunit Alpha 1                      | 4.87 |
| HSPG2     | Heparan Sulfate Proteoglycan 2               | 4.87 |
| CORO1A    | Coronin 1A                                   | 4.87 |
| PGM3      | Phosphoglucomutase 3                         | 4.87 |
| KRT4      | Keratin 4                                    | 4.87 |
| ICMT      | Isoprenylcysteine Carboxyl Methyltransferase | 4.87 |
| NHEJ1     | Non-Homologous End Joining Factor 1          | 4.87 |
| SLC30A5   | Solute Carrier Family 30 Member 5            | 4.87 |
| SLC39A7   | Solute Carrier Family 39 Member 7            | 4.87 |
| BGLAP     | Bone Gamma-Carboxyglutamate Protein          | 4.87 |
| SLC39A10  | Solute Carrier Family 39 Member 10           | 4.87 |
| SLC39A5   | Solute Carrier Family 39 Member 5            | 4.87 |
| SLC39A6   | Solute Carrier Family 39 Member 6            | 4.87 |
| SLC30A1   | Solute Carrier Family 30 Member 1            | 4.87 |
| SLC30A7   | Solute Carrier Family 30 Member 7            | 4.87 |
| SLC39A12  | Solute Carrier Family 39 Member 12           | 4.87 |
| MIA2      | MIA SH3 Domain ER Export Factor 2            | 4.87 |
| KRT35     | Keratin 35                                   | 4.87 |
| H3-2      | H3.2 Histone (Putative)                      | 4.87 |
| MIR500A   | MicroRNA 500a                                | 4.87 |
| FEN1      | Flap Structure-Specific Endonuclease 1       | 4.78 |
| IRF8      | Interferon Regulatory Factor 8               | 4.78 |
| CRYAA     | Crystallin Alpha A                           | 4.78 |
| TRAF3IP2  | TRAF3 Interacting Protein 2                  | 4.78 |
| IRF6      | Interferon Regulatory Factor 6               | 4.78 |
| FGF7      | Fibroblast Growth Factor 7                   | 4.76 |
| DPP4      | Dipeptidyl Peptidase 4                       | 4.63 |
| PAH       | Phenylalanine Hydroxylase                    | 4.63 |
| CASP14    | Caspase 14                                   | 4.63 |
| HDAC4     | Histone Deacetylase 4                        | 4.62 |
| WNT3      | Wnt Family Member 3                          | 4.58 |
| ALDH1L1   | Aldehyde Dehydrogenase 1 Family Member L1    | 4.58 |
| SHH       | Sonic Hedgehog Signaling Molecule            | 4.57 |
| IHH       | Indian Hedgehog Signaling Molecule           | 4.57 |
| CCR4      | C-C Motif Chemokine Receptor 4               | 4.57 |
| TNFRSF10A | TNF Receptor Superfamily Member 10a          | 4.57 |
| RBP1      | Retinol Binding Protein 1                    | 4.54 |
| MFN2      | Mitofusin 2                                  | 4.5  |
| EGF       | Epidermal Growth Factor                      | 4.5  |
| AKT1      | AKT Serine/Threonine Kinase 1                | 4.44 |
| CSF1R     | Colony Stimulating Factor 1 Receptor         | 4.44 |

|           |                                                           |      |
|-----------|-----------------------------------------------------------|------|
| IKBKB     | Inhibitor Of Nuclear Factor Kappa B Kinase Subunit Beta   | 4.44 |
| MYC       | MYC Proto-Oncogene, BHLH Transcription Factor             | 4.44 |
| G6PD      | Glucose-6-Phosphate Dehydrogenase                         | 4.44 |
| DNMT1     | DNA Methyltransferase 1                                   | 4.44 |
| MYB       | MYB Proto-Oncogene, Transcription Factor                  | 4.44 |
| MPO       | Myeloperoxidase                                           | 4.44 |
| ROCK1     | Rho Associated Coiled-Coil Containing Protein Kinase 1    | 4.44 |
| LPL       | Lipoprotein Lipase                                        | 4.44 |
| BUB1B     | BUB1 Mitotic Checkpoint Serine/Threonine Kinase B         | 4.44 |
| STAT5B    | Signal Transducer And Activator Of Transcription 5B       | 4.44 |
| RAC1      | Rac Family Small GTPase 1                                 | 4.44 |
| CYCS      | Cytochrome C, Somatic                                     | 4.44 |
| IGF2      | Insulin Like Growth Factor 2                              | 4.44 |
| SIRT2     | Sirtuin 2                                                 | 4.44 |
| SIRT3     | Sirtuin 3                                                 | 4.44 |
| CCR3      | C-C Motif Chemokine Receptor 3                            | 4.44 |
| HADH      | Hydroxyacyl-CoA Dehydrogenase                             | 4.44 |
| TNFRSF11B | TNF Receptor Superfamily Member 11b                       | 4.44 |
| TRAF6     | TNF Receptor Associated Factor 6                          | 4.44 |
| TLR8      | Toll Like Receptor 8                                      | 4.44 |
| LMNB1     | Lamin B1                                                  | 4.44 |
| GAD2      | Glutamate Decarboxylase 2                                 | 4.44 |
| GGT1      | Gamma-Glutamyltransferase 1                               | 4.44 |
| TLR7      | Toll Like Receptor 7                                      | 4.44 |
| PRPS1     | Phosphoribosyl Pyrophosphate Synthetase 1                 | 4.44 |
| ACAN      | Aggrecan                                                  | 4.44 |
| RFC1      | Replication Factor C Subunit 1                            | 4.44 |
| EMD       | Emerin                                                    | 4.44 |
| IL10RA    | Interleukin 10 Receptor Subunit Alpha                     | 4.44 |
| SIRT5     | Sirtuin 5                                                 | 4.44 |
| SIRT6     | Sirtuin 6                                                 | 4.44 |
| RAN       | RAN, Member RAS Oncogene Family                           | 4.44 |
| PPARA     | Peroxisome Proliferator Activated Receptor Alpha          | 4.44 |
| XRCC6     | X-Ray Repair Cross Complementing 6                        | 4.44 |
| VCAM1     | Vascular Cell Adhesion Molecule 1                         | 4.44 |
| CBX5      | Chromobox 5                                               | 4.44 |
| GMPS      | Guanine Monophosphate Synthase                            | 4.44 |
| FCGR3A    | Fc Fragment Of IgG Receptor IIIa                          | 4.44 |
| ANK3      | Ankyrin 3                                                 | 4.44 |
| EIF2B4    | Eukaryotic Translation Initiation Factor 2B Subunit Delta | 4.44 |
| RUVEL2    | RuvB Like AAA ATPase 2                                    | 4.44 |



|          |                                                             |      |
|----------|-------------------------------------------------------------|------|
| WIPF1    | WAS/WASL Interacting Protein Family Member 1                | 4.44 |
| LIPC     | Lipase C, Hepatic Type                                      | 4.44 |
| HIBCH    | 3-Hydroxyisobutyryl-CoA Hydrolase                           | 4.44 |
| SPG7     | SPG7 Matrix AAA Peptidase Subunit, Paraplegin               | 4.44 |
| RBBP4    | RB Binding Protein 4, Chromatin Remodeling Factor           | 4.44 |
| EFNA5    | Ephrin A5                                                   | 4.44 |
| SUV39H1  | Suppressor Of Variegation 3-9 Homolog 1                     | 4.44 |
| LMNB2    | Lamin B2                                                    | 4.44 |
| DMP1     | Dentin Matrix Acidic Phosphoprotein 1                       | 4.44 |
| SELL     | Selectin L                                                  | 4.44 |
| SIRT7    | Sirtuin 7                                                   | 4.44 |
| SLC34A3  | Solute Carrier Family 34 Member 3                           | 4.44 |
| SYNE1    | Spectrin Repeat Containing Nuclear Envelope Protein 1       | 4.44 |
| UBA7     | Ubiquitin Like Modifier Activating Enzyme 7                 | 4.44 |
| MAGT1    | Magnesium Transporter 1                                     | 4.44 |
| ADAMTS17 | ADAM Metallopeptidase With Thrombospondin Type 1 Motif 17   | 4.44 |
| SIRT4    | Sirtuin 4                                                   | 4.44 |
| NUP153   | Nucleoporin 153                                             | 4.44 |
| VNN2     | Vanin 2                                                     | 4.44 |
| RRAGD    | Ras Related GTP Binding D                                   | 4.44 |
| LEMD2    | LEM Domain Nuclear Envelope Protein 2                       | 4.44 |
| TTC37    | Tetratricopeptide Repeat Domain 37                          | 4.44 |
| SYNE2    | Spectrin Repeat Containing Nuclear Envelope Protein 2       | 4.44 |
| NAT10    | N-Acetyltransferase 10                                      | 4.44 |
| RCE1     | Ras Converting CAAX Endopeptidase 1                         | 4.44 |
| DLGAP3   | DLG Associated Protein 3                                    | 4.44 |
| GPS1     | G Protein Pathway Suppressor 1                              | 4.44 |
| PGGT1B   | Protein Geranylgeranyltransferase Type I Subunit Beta       | 4.44 |
| SUN1     | Sad1 And UNC84 Domain Containing 1                          | 4.44 |
| SUN2     | Sad1 And UNC84 Domain Containing 2                          | 4.44 |
| LYSMD4   | LysM Domain Containing 4                                    | 4.44 |
| SPATA22  | Spermatogenesis Associated 22                               | 4.44 |
| TMEM41A  | Transmembrane Protein 41A                                   | 4.44 |
| SYNE3    | Spectrin Repeat Containing Nuclear Envelope Family Member 3 | 4.44 |
| PRSS54   | Serine Protease 54                                          | 4.44 |
| SYNE4    | Spectrin Repeat Containing Nuclear Envelope Family Member 4 | 4.44 |
| WFDC12   | WAP Four-Disulfide Core Domain 12                           | 4.44 |
| FAM71E1  | Family With Sequence Similarity 71 Member E1                | 4.44 |
| SPATA46  | Spermatogenesis Associated 46                               | 4.44 |
| LEXM     | Lymphocyte Expansion Molecule                               | 4.44 |
| MIR9-1   | MicroRNA 9-1                                                | 4.44 |

|              |                                                          |      |
|--------------|----------------------------------------------------------|------|
| IGHV4-38-2   | Immunoglobulin Heavy Variable 4-38-2                     | 4.44 |
| H6PD         | Hexose-6-Phosphate Dehydrogenase/Glucose 1-Dehydrogenase | 4.38 |
| IFNB1        | Interferon Beta 1                                        | 4.38 |
| CST6         | Cystatin E/M                                             | 4.38 |
| SRY          | Sex Determining Region Y                                 | 4.34 |
| IL4R         | Interleukin 4 Receptor                                   | 4.31 |
| TRAF1        | TNF Receptor Associated Factor 1                         | 4.31 |
| FCRL3        | Fc Receptor Like 3                                       | 4.31 |
| BRAF         | B-Raf Proto-Oncogene, Serine/Threonine Kinase            | 4.3  |
| ICOS         | Inducible T Cell Costimulator                            | 4.29 |
| CIITA        | Class II Major Histocompatibility Complex Transactivator | 4.25 |
| MICB         | MHC Class I Polypeptide-Related Sequence B               | 4.25 |
| ZNF577       | Zinc Finger Protein 577                                  | 4.25 |
| RMI2         | RecQ Mediated Genome Instability 2                       | 4.25 |
| MIR223       | MicroRNA 223                                             | 4.25 |
| RAF1         | Raf-1 Proto-Oncogene, Serine/Threonine Kinase            | 4.24 |
| CASP3        | Caspase 3                                                | 4.24 |
| TF           | Transferrin                                              | 4.17 |
| FGFR2        | Fibroblast Growth Factor Receptor 2                      | 4.16 |
| RAD51        | RAD51 Recombinase                                        | 4.16 |
| PTCH1        | Patched 1                                                | 4.16 |
| DSC2         | Desmocollin 2                                            | 4.16 |
| HMGA2        | High Mobility Group AT-Hook 2                            | 4.16 |
| LOC107988021 | IKBKG Recombination Region                               | 4.16 |
| LOC107988022 | IKBKG Downstream Recombination Region                    | 4.16 |
| SLC5A11      | Solute Carrier Family 5 Member 11                        | 4.15 |
| CXCL1        | C-X-C Motif Chemokine Ligand 1                           | 4.11 |
| TOP1         | DNA Topoisomerase I                                      | 4.07 |
| CYP17A1      | Cytochrome P450 Family 17 Subfamily A Member 1           | 4.04 |
| LAMC1        | Laminin Subunit Gamma 1                                  | 4.04 |
| PTPN11       | Protein Tyrosine Phosphatase Non-Receptor Type 11        | 3.98 |
| CXCR4        | C-X-C Motif Chemokine Receptor 4                         | 3.98 |
| GAD1         | Glutamate Decarboxylase 1                                | 3.98 |
| CALR         | Calreticulin                                             | 3.98 |
| DNMT3A       | DNA Methyltransferase 3 Alpha                            | 3.98 |
| RAC2         | Rac Family Small GTPase 2                                | 3.98 |
| CAT          | Catalase                                                 | 3.98 |
| DRD2         | Dopamine Receptor D2                                     | 3.98 |
| DNMT3B       | DNA Methyltransferase 3 Beta                             | 3.98 |
| SYK          | Spleen Associated Tyrosine Kinase                        | 3.98 |
| GATA3        | GATA Binding Protein 3                                   | 3.98 |

|         |                                                                                  |      |
|---------|----------------------------------------------------------------------------------|------|
| ETS1    | ETS Proto-Oncogene 1, Transcription Factor                                       | 3.98 |
| ACE     | Angiotensin I Converting Enzyme                                                  | 3.98 |
| RIPK1   | Receptor Interacting Serine/Threonine Kinase 1                                   | 3.98 |
| TTR     | Transthyretin                                                                    | 3.98 |
| AHR     | Aryl Hydrocarbon Receptor                                                        | 3.98 |
| REN     | Renin                                                                            | 3.98 |
| POLH    | DNA Polymerase Eta                                                               | 3.98 |
| FZD6    | Frizzled Class Receptor 6                                                        | 3.98 |
| NLRP3   | NLR Family Pyrin Domain Containing 3                                             | 3.98 |
| SLC1A1  | Solute Carrier Family 1 Member 1                                                 | 3.98 |
| CCR5    | C-C Motif Chemokine Receptor 5                                                   | 3.98 |
| CLU     | Clusterin                                                                        | 3.98 |
| DRD4    | Dopamine Receptor D4                                                             | 3.98 |
| GATA1   | GATA Binding Protein 1                                                           | 3.98 |
| ENG     | Endoglin                                                                         | 3.98 |
| CCR7    | C-C Motif Chemokine Receptor 7                                                   | 3.98 |
| APPL1   | Adaptor Protein, Phosphotyrosine Interacting With PH Domain And Leucine Zipper 1 | 3.98 |
| MECP2   | Methyl-CpG Binding Protein 2                                                     | 3.98 |
| CYP1A2  | Cytochrome P450 Family 1 Subfamily A Member 2                                    | 3.98 |
| SAT1    | Spermidine/Spermine N1-Acetyltransferase 1                                       | 3.98 |
| NCAM1   | Neural Cell Adhesion Molecule 1                                                  | 3.98 |
| SMAD9   | SMAD Family Member 9                                                             | 3.98 |
| HSD11B2 | Hydroxysteroid 11-Beta Dehydrogenase 2                                           | 3.98 |
| SLC2A4  | Solute Carrier Family 2 Member 4                                                 | 3.98 |
| TXK     | TXK Tyrosine Kinase                                                              | 3.98 |
| STAT5A  | Signal Transducer And Activator Of Transcription 5A                              | 3.98 |
| TRPM4   | Transient Receptor Potential Cation Channel Subfamily M Member 4                 | 3.98 |
| PON1    | Paraoxonase 1                                                                    | 3.98 |
| ARID1B  | AT-Rich Interaction Domain 1B                                                    | 3.98 |
| CLEC7A  | C-Type Lectin Domain Containing 7A                                               | 3.98 |
| MMP12   | Matrix Metalloproteinase 12                                                      | 3.98 |
| DRD3    | Dopamine Receptor D3                                                             | 3.98 |
| IL17RA  | Interleukin 17 Receptor A                                                        | 3.98 |
| PRTN3   | Proteinase 3                                                                     | 3.98 |
| PNPLA2  | Patatin Like Phospholipase Domain Containing 2                                   | 3.98 |
| POFUT1  | Protein O-Fucosyltransferase 1                                                   | 3.98 |
| TRAF2   | TNF Receptor Associated Factor 2                                                 | 3.98 |
| LAMA4   | Laminin Subunit Alpha 4                                                          | 3.98 |
| TLR6    | Toll Like Receptor 6                                                             | 3.98 |
| THBD    | Thrombomodulin                                                                   | 3.98 |

|           |                                                                                        |      |
|-----------|----------------------------------------------------------------------------------------|------|
| CARD14    | Caspase Recruitment Domain Family Member 14                                            | 3.98 |
| HOXA13    | Homeobox A13                                                                           | 3.98 |
| DLGAP1    | DLG Associated Protein 1                                                               | 3.98 |
| PRSS8     | Serine Protease 8                                                                      | 3.98 |
| IL12RB2   | Interleukin 12 Receptor Subunit Beta 2                                                 | 3.98 |
| IFNGR2    | Interferon Gamma Receptor 2                                                            | 3.98 |
| LCT       | Lactase                                                                                | 3.98 |
| RBCK1     | RANBP2-Type And C3HC4-Type Zinc Finger Containing 1                                    | 3.98 |
| MUS81     | MUS81 Structure-Specific Endonuclease Subunit                                          | 3.98 |
| PIGQ      | Phosphatidylinositol Glycan Anchor Biosynthesis Class Q                                | 3.98 |
| CCK       | Cholecystokinin                                                                        | 3.98 |
| CD5       | CD5 Molecule                                                                           | 3.98 |
| RNF31     | Ring Finger Protein 31                                                                 | 3.98 |
| SLC38A2   | Solute Carrier Family 38 Member 2                                                      | 3.98 |
| RECQL     | RecQ Like Helicase                                                                     | 3.98 |
| ACSM1     | Acyl-CoA Synthetase Medium Chain Family Member 1                                       | 3.98 |
| CWC27     | CWC27 Spliceosome Associated Cyclophilin                                               | 3.98 |
| IL17RC    | Interleukin 17 Receptor C                                                              | 3.98 |
| PQBP1     | Polyglutamine Binding Protein 1                                                        | 3.98 |
| POGLUT1   | Protein O-Glucosyltransferase 1                                                        | 3.98 |
| KCTD1     | Potassium Channel Tetramerization Domain Containing 1                                  | 3.98 |
| TLR10     | Toll Like Receptor 10                                                                  | 3.98 |
| IL33      | Interleukin 33                                                                         | 3.98 |
| SHARPIN   | SHANK Associated RH Domain Interactor                                                  | 3.98 |
| PPP1R13L  | Protein Phosphatase 1 Regulatory Subunit 13 Like                                       | 3.98 |
| SLC15A4   | Solute Carrier Family 15 Member 4                                                      | 3.98 |
| JAZF1     | JAZF Zinc Finger 1                                                                     | 3.98 |
| SNRNP70   | Small Nuclear Ribonucleoprotein U1 Subunit 70                                          | 3.98 |
| KIAA0319L | KIAA0319 Like                                                                          | 3.98 |
| MRAP      | Melanocortin 2 Receptor Accessory Protein                                              | 3.98 |
| SLITRK5   | SLIT And NTRK Like Family Member 5                                                     | 3.98 |
| PHLDA2    | Pleckstrin Homology Like Domain Family A Member 2                                      | 3.98 |
| KIR3DL2   | Killer Cell Immunoglobulin Like Receptor, Three Ig Domains And Long Cytoplasmic Tail 2 | 3.98 |
| HOXB8     | Homeobox B8                                                                            | 3.98 |
| SLITRK2   | SLIT And NTRK Like Family Member 2                                                     | 3.98 |
| SLITRK3   | SLIT And NTRK Like Family Member 3                                                     | 3.98 |
| TBL1X     | Transducin Beta Like 1 X-Linked                                                        | 3.98 |
| MEPE      | Matrix Extracellular Phosphoglycoprotein                                               | 3.98 |
| CLNK      | Cytokine Dependent Hematopoietic Cell Linker                                           | 3.98 |
| MTCP1     | Mature T Cell Proliferation 1                                                          | 3.98 |

|          |                                                     |      |
|----------|-----------------------------------------------------|------|
| WDR20    | WD Repeat Domain 20                                 | 3.98 |
| ALX3     | ALX Homeobox 3                                      | 3.98 |
| SCGB2A1  | Secretoglobin Family 2A Member 1                    | 3.98 |
| SPZ1     | Spermatogenic Leucine Zipper 1                      | 3.98 |
| FOXQ1    | Forkhead Box Q1                                     | 3.98 |
| PRR4     | Proline Rich 4                                      | 3.98 |
| CATIP    | Ciliogenesis Associated TTC17 Interacting Protein   | 3.98 |
| TMEM238  | Transmembrane Protein 238                           | 3.98 |
| APELA    | Apelin Receptor Early Endogenous Ligand             | 3.98 |
| MIR24-1  | MicroRNA 24-1                                       | 3.98 |
| CANDN1   | Candidiasis, Nail 1 (With ICAM1 Deficiency)         | 3.98 |
| CELIAC2  | Celiac Disease 2                                    | 3.98 |
| SLEB3    | Systemic Lupus Erythematosus Susceptibility 3       | 3.98 |
| LPRS     | Leprosy, Susceptibility To 1                        | 3.98 |
| LPRS6    | Leprosy, Susceptibility To, 6                       | 3.98 |
| ATOD1    | Dermatitis, Atopic                                  | 3.98 |
| ATOD3    | Dermatitis, Atopic, 3                               | 3.98 |
| ATOD5    | Dermatitis, Atopic, 5                               | 3.98 |
| ATOD6    | Dermatitis, Atopic, 6                               | 3.98 |
| ATOD7    | Dermatitis, Atopic, Susceptibility To, 7            | 3.98 |
| ATOD8    | Dermatitis, Atopic, 8                               | 3.98 |
| ATOD9    | Dermatitis, Atopic, 9                               | 3.98 |
| CELIAC10 | Celiac Disease, Susceptibility To, 10               | 3.98 |
| CELIAC11 | Celiac Disease, Susceptibility To, 11               | 3.98 |
| CELIAC12 | Celiac Disease, Susceptibility To, 12               | 3.98 |
| CELIAC13 | Celiac Disease, Susceptibility To, 13               | 3.98 |
| CELIAC5  | Celiac Disease, Susceptibility To, 5                | 3.98 |
| CELIAC6  | Celiac Disease, Susceptibility To, 6                | 3.98 |
| CELIAC7  | Celiac Disease, Susceptibility To, 7                | 3.98 |
| CELIAC8  | Celiac Disease, Susceptibility To, 8                | 3.98 |
| CELIAC9  | Celiac Disease, Susceptibility To, 9                | 3.98 |
| EDSS2    | Ectodermal Dysplasia-Syndactyly Syndrome 2          | 3.98 |
| DEL18P   | Chromosome 18p Deletion Syndrome                    | 3.98 |
| SLEB12   | Systemic Lupus Erythematosus, Susceptibility To, 12 | 3.98 |
| SLEB13   | Systemic Lupus Erythematosus, Susceptibility To, 13 | 3.98 |
| SLEB14   | Systemic Lupus Erythematosus, Susceptibility To, 14 | 3.98 |
| SLEB15   | Systemic Lupus Erythematosus, Susceptibility To, 15 | 3.98 |
| SLEB4    | Systemic Lupus Erythematosus, Susceptibility To, 4  | 3.98 |
| SLEB5    | Systemic Lupus Erythematosus, Susceptibility To, 5  | 3.98 |
| SLEB7    | Systemic Lupus Erythematosus, Susceptibility To, 7  | 3.98 |
| SLEB8    | Systemic Lupus Erythematosus, Susceptibility To, 8  | 3.98 |

|              |                                                       |      |
|--------------|-------------------------------------------------------|------|
| SS3          | Sarcoidosis, Susceptibility To, 3                     | 3.98 |
| HYPT9        | Hypotrichosis 9                                       | 3.98 |
| LOC107988024 | IKBKGP1 Recombination Region                          | 3.98 |
| LOC107988025 | IKBKGP1 Upstream Recombination Region                 | 3.98 |
| DUSP22       | Dual Specificity Phosphatase 22                       | 3.95 |
| NF1          | Neurofibromin 1                                       | 3.85 |
| PSIP1        | PC4 And SFRS1 Interacting Protein 1                   | 3.8  |
| NOTCH3       | Notch Receptor 3                                      | 3.73 |
| IL36RN       | Interleukin 36 Receptor Antagonist                    | 3.72 |
| HLA-DRB3     | Major Histocompatibility Complex, Class II, DR Beta 3 | 3.72 |
| DDC          | Dopa Decarboxylase                                    | 3.71 |
| TH           | Tyrosine Hydroxylase                                  | 3.71 |
| TPH1         | Tryptophan Hydroxylase 1                              | 3.71 |
| APEX1        | Apurinic/Apyrimidinic Endodeoxyribonuclease 1         | 3.68 |
| XRCC1        | X-Ray Repair Cross Complementing 1                    | 3.68 |
| GLI1         | GLI Family Zinc Finger 1                              | 3.63 |
| TRIM21       | Tripartite Motif Containing 21                        | 3.63 |
| KDM5A        | Lysine Demethylase 5A                                 | 3.63 |
| INCENP       | Inner Centromere Protein                              | 3.63 |
| KRT24        | Keratin 24                                            | 3.63 |
| IGKC         | Immunoglobulin Kappa Constant                         | 3.63 |
| PLCG1        | Phospholipase C Gamma 1                               | 3.61 |
| CYP27A1      | Cytochrome P450 Family 27 Subfamily A Member 1        | 3.61 |
| C1R          | Complement C1r                                        | 3.61 |
| C1S          | Complement C1s                                        | 3.61 |
| PTHLH        | Parathyroid Hormone Like Hormone                      | 3.61 |
| CTPS1        | CTP Synthase 1                                        | 3.61 |
| PEX14        | Peroxisomal Biogenesis Factor 14                      | 3.61 |
| SKIV2L       | Ski2 Like RNA Helicase                                | 3.61 |
| ERAP2        | Endoplasmic Reticulum Aminopeptidase 2                | 3.61 |
| RPTN         | Repetin                                               | 3.61 |
| HRNR         | Hornerin                                              | 3.61 |
| TSPEAR       | Thrombospondin Type Laminin G Domain And EAR Repeats  | 3.61 |
| PSORS1C1     | Psoriasis Susceptibility 1 Candidate 1                | 3.61 |
| IL3          | Interleukin 3                                         | 3.59 |
| HDAC1        | Histone Deacetylase 1                                 | 3.57 |
| GH1          | Growth Hormone 1                                      | 3.57 |
| ITGB2        | Integrin Subunit Beta 2                               | 3.57 |
| NR0B1        | Nuclear Receptor Subfamily 0 Group B Member 1         | 3.57 |
| CCL27        | C-C Motif Chemokine Ligand 27                         | 3.57 |
| NOS3         | Nitric Oxide Synthase 3                               | 3.49 |

|          |                                                                              |      |
|----------|------------------------------------------------------------------------------|------|
| MUC1     | Mucin 1, Cell Surface Associated                                             | 3.49 |
| TAP1     | Transporter 1, ATP Binding Cassette Subfamily B Member                       | 3.49 |
| C5       | Complement C5                                                                | 3.49 |
| NKX2-1   | NK2 Homeobox 1                                                               | 3.49 |
| KRT7     | Keratin 7                                                                    | 3.49 |
| GNLY     | Granulysin                                                                   | 3.49 |
| MIR30D   | MicroRNA 30d                                                                 | 3.49 |
| PTGDR2   | Prostaglandin D2 Receptor 2                                                  | 3.47 |
| JAK2     | Janus Kinase 2                                                               | 3.44 |
| AKT3     | AKT Serine/Threonine Kinase 3                                                | 3.44 |
| SLC2A1   | Solute Carrier Family 2 Member 1                                             | 3.44 |
| LCK      | LCK Proto-Oncogene, Src Family Tyrosine Kinase                               | 3.44 |
| ALK      | ALK Receptor Tyrosine Kinase                                                 | 3.44 |
| COMT     | Catechol-O-Methyltransferase                                                 | 3.44 |
| PRKAR1A  | Protein Kinase CAMP-Dependent Type I Regulatory Subunit Alpha                | 3.44 |
| LYN      | LYN Proto-Oncogene, Src Family Tyrosine Kinase                               | 3.44 |
| CD247    | CD247 Molecule                                                               | 3.44 |
| WNT7A    | Wnt Family Member 7A                                                         | 3.44 |
| EPAS1    | Endothelial PAS Domain Protein 1                                             | 3.44 |
| B2M      | Beta-2-Microglobulin                                                         | 3.44 |
| F2       | Coagulation Factor II, Thrombin                                              | 3.44 |
| APOA1    | Apolipoprotein A1                                                            | 3.44 |
| LRP5     | LDL Receptor Related Protein 5                                               | 3.44 |
| FANCA    | FA Complementation Group A                                                   | 3.44 |
| ABCA1    | ATP Binding Cassette Subfamily A Member 1                                    | 3.44 |
| CYP11A1  | Cytochrome P450 Family 11 Subfamily A Member 1                               | 3.44 |
| MVK      | Mevalonate Kinase                                                            | 3.44 |
| CD36     | CD36 Molecule                                                                | 3.44 |
| EGLN1    | Egl-9 Family Hypoxia Inducible Factor 1                                      | 3.44 |
| TNNT2    | Troponin T2, Cardiac Type                                                    | 3.44 |
| HSP90AA1 | Heat Shock Protein 90 Alpha Family Class A Member 1                          | 3.44 |
| TFRC     | Transferrin Receptor                                                         | 3.44 |
| C3       | Complement C3                                                                | 3.44 |
| MEF2A    | Myocyte Enhancer Factor 2A                                                   | 3.44 |
| MBL2     | Mannose Binding Lectin 2                                                     | 3.44 |
| MALT1    | MALT1 Paracaspase                                                            | 3.44 |
| HADHB    | Hydroxyacyl-CoA Dehydrogenase Trifunctional Multienzyme Complex Subunit Beta | 3.44 |
| NCF2     | Neutrophil Cytosolic Factor 2                                                | 3.44 |
| OTC      | Ornithine Carbamoyltransferase                                               | 3.44 |
| LIPE     | Lipase E, Hormone Sensitive Type                                             | 3.44 |

|         |                                                                                                   |      |
|---------|---------------------------------------------------------------------------------------------------|------|
| FST     | Follistatin                                                                                       | 3.44 |
| CEL     | Carboxyl Ester Lipase                                                                             | 3.44 |
| HSD17B4 | Hydroxysteroid 17-Beta Dehydrogenase 4                                                            | 3.44 |
| F5      | Coagulation Factor V                                                                              | 3.44 |
| FECH    | Ferrochelatase                                                                                    | 3.44 |
| AICDA   | Activation Induced Cytidine Deaminase                                                             | 3.44 |
| BCL6    | BCL6 Transcription Repressor                                                                      | 3.44 |
| ADH5    | Alcohol Dehydrogenase 5 (Class III), Chi Polypeptide                                              | 3.44 |
| CCNH    | Cyclin H                                                                                          | 3.44 |
| RORC    | RAR Related Orphan Receptor C                                                                     | 3.44 |
| CD27    | CD27 Molecule                                                                                     | 3.44 |
| ELOVL4  | ELOVL Fatty Acid Elongase 4                                                                       | 3.44 |
| SMARCB1 | SWI/SNF Related, Matrix Associated, Actin Dependent Regulator Of Chromatin, Subfamily B, Member 1 | 3.44 |
| TBX21   | T-Box Transcription Factor 21                                                                     | 3.44 |
| OXTR    | Oxytocin Receptor                                                                                 | 3.44 |
| SELP    | Selectin P                                                                                        | 3.44 |
| TIMP1   | TIMP Metallopeptidase Inhibitor 1                                                                 | 3.44 |
| ADAR    | Adenosine Deaminase RNA Specific                                                                  | 3.44 |
| FOXC2   | Forkhead Box C2                                                                                   | 3.44 |
| HP      | Haptoglobin                                                                                       | 3.44 |
| CNDP1   | Carnosine Dipeptidase 1                                                                           | 3.44 |
| HMGB1   | High Mobility Group Box 1                                                                         | 3.44 |
| CDC45   | Cell Division Cycle 45                                                                            | 3.44 |
| PEX1    | Peroxisomal Biogenesis Factor 1                                                                   | 3.44 |
| SNRPB   | Small Nuclear Ribonucleoprotein Polypeptides B And B1                                             | 3.44 |
| NLRP1   | NLR Family Pyrin Domain Containing 1                                                              | 3.44 |
| ITGAX   | Integrin Subunit Alpha X                                                                          | 3.44 |
| DLX5    | Distal-Less Homeobox 5                                                                            | 3.44 |
| AZGP1   | Alpha-2-Glycoprotein 1, Zinc-Binding                                                              | 3.44 |
| LRPAP1  | LDL Receptor Related Protein Associated Protein 1                                                 | 3.44 |
| BMP6    | Bone Morphogenetic Protein 6                                                                      | 3.44 |
| EXO1    | Exonuclease 1                                                                                     | 3.44 |
| DHRS3   | Dehydrogenase/Reductase 3                                                                         | 3.44 |
| PEX2    | Peroxisomal Biogenesis Factor 2                                                                   | 3.44 |
| OCA2    | OCA2 Melanosomal Transmembrane Protein                                                            | 3.44 |
| IL9     | Interleukin 9                                                                                     | 3.44 |
| LCN2    | Lipocalin 2                                                                                       | 3.44 |
| RANBP1  | RAN Binding Protein 1                                                                             | 3.44 |
| KCNA4   | Potassium Voltage-Gated Channel Subfamily A Member 4                                              | 3.44 |
| SUFU    | SUFU Negative Regulator Of Hedgehog Signaling                                                     | 3.44 |



|         |                                                                                        |      |
|---------|----------------------------------------------------------------------------------------|------|
| PEX6    | Peroxisomal Biogenesis Factor 6                                                        | 3.44 |
| HIRA    | Histone Cell Cycle Regulator                                                           | 3.44 |
| TOP3A   | DNA Topoisomerase III Alpha                                                            | 3.44 |
| TBX1    | T-Box Transcription Factor 1                                                           | 3.44 |
| CD1D    | CD1d Molecule                                                                          | 3.44 |
| TG      | Thyroglobulin                                                                          | 3.44 |
| ARFGEF2 | ADP Ribosylation Factor Guanine Nucleotide Exchange Factor 2                           | 3.44 |
| CLTCL1  | Clathrin Heavy Chain Like 1                                                            | 3.44 |
| HCCS    | Holocytochrome C Synthase                                                              | 3.44 |
| DNA2    | DNA Replication Helicase/Nuclease 2                                                    | 3.44 |
| ELOVL1  | ELOVL Fatty Acid Elongase 1                                                            | 3.44 |
| SPINK5  | Serine Peptidase Inhibitor Kazal Type 5                                                | 3.44 |
| PLS3    | Plastin 3                                                                              | 3.44 |
| SLC24A5 | Solute Carrier Family 24 Member 5                                                      | 3.44 |
| KLK5    | Kallikrein Related Peptidase 5                                                         | 3.44 |
| RAD52   | RAD52 Homolog, DNA Repair Protein                                                      | 3.44 |
| CD1A    | CD1a Molecule                                                                          | 3.44 |
| RCHY1   | Ring Finger And CHY Zinc Finger Domain Containing 1                                    | 3.44 |
| ALDH1L2 | Aldehyde Dehydrogenase 1 Family Member L2                                              | 3.44 |
| GTF2H4  | General Transcription Factor IIH Subunit 4                                             | 3.44 |
| CEP120  | Centrosomal Protein 120                                                                | 3.44 |
| CEP290  | Centrosomal Protein 290                                                                | 3.44 |
| CD69    | CD69 Molecule                                                                          | 3.44 |
| PEX13   | Peroxisomal Biogenesis Factor 13                                                       | 3.44 |
| SLC45A2 | Solute Carrier Family 45 Member 2                                                      | 3.44 |
| TOX     | Thymocyte Selection Associated High Mobility Group Box                                 | 3.44 |
| TAF5L   | TATA-Box Binding Protein Associated Factor 5 Like                                      | 3.44 |
| KLK7    | Kallikrein Related Peptidase 7                                                         | 3.44 |
| KIR3DL1 | Killer Cell Immunoglobulin Like Receptor, Three Ig Domains And Long Cytoplasmic Tail 1 | 3.44 |
| OXT     | Oxytocin/Neurophysin I Prepropeptide                                                   | 3.44 |
| DYNC1I1 | Dynein Cytoplasmic 1 Intermediate Chain 1                                              | 3.44 |
| HOXC4   | Homeobox C4                                                                            | 3.44 |
| GTF2H2  | General Transcription Factor IIH Subunit 2                                             | 3.44 |
| SLC15A2 | Solute Carrier Family 15 Member 2                                                      | 3.44 |
| SUPT5H  | SPT5 Homolog, DSIF Elongation Factor Subunit                                           | 3.44 |
| KANK2   | KN Motif And Ankyrin Repeat Domains 2                                                  | 3.44 |
| MYCBP2  | MYC Binding Protein 2                                                                  | 3.44 |
| CD1B    | CD1b Molecule                                                                          | 3.44 |
| CD1C    | CD1c Molecule                                                                          | 3.44 |
| ITGAE   | Integrin Subunit Alpha E                                                               | 3.44 |

|          |                                                      |      |
|----------|------------------------------------------------------|------|
| RECQL5   | RecQ Like Helicase 5                                 | 3.44 |
| WLS      | Wnt Ligand Secretion Mediator                        | 3.44 |
| CCL22    | C-C Motif Chemokine Ligand 22                        | 3.44 |
| PES1     | Pescadillo Ribosomal Biogenesis Factor 1             | 3.44 |
| CCR10    | C-C Motif Chemokine Receptor 10                      | 3.44 |
| ACKR2    | Atypical Chemokine Receptor 2                        | 3.44 |
| ACOT9    | Acyl-CoA Thioesterase 9                              | 3.44 |
| RMI1     | RecQ Mediated Genome Instability 1                   | 3.44 |
| DEFB4A   | Defensin Beta 4A                                     | 3.44 |
| DCLK3    | Doublecortin Like Kinase 3                           | 3.44 |
| SLC16A12 | Solute Carrier Family 16 Member 12                   | 3.44 |
| SLC15A3  | Solute Carrier Family 15 Member 3                    | 3.44 |
| IQSEC2   | IQ Motif And Sec7 Domain ArfGEF 2                    | 3.44 |
| TRAPPC10 | Trafficking Protein Particle Complex 10              | 3.44 |
| IL37     | Interleukin 37                                       | 3.44 |
| CCL18    | C-C Motif Chemokine Ligand 18                        | 3.44 |
| AMELX    | Amelogenin X-Linked                                  | 3.44 |
| NOTUM    | Notum, Palmitoleoyl-Protein Carboxylesterase         | 3.44 |
| SNRPD3   | Small Nuclear Ribonucleoprotein D3 Polypeptide       | 3.44 |
| LAD1     | Ladinin 1                                            | 3.44 |
| TSPYL2   | TSPY Like 2                                          | 3.44 |
| PIF1     | PIF1 5'-To-3' DNA Helicase                           | 3.44 |
| HOXC12   | Homeobox C12                                         | 3.44 |
| RNPC3    | RNA Binding Region (RNP1, RRM) Containing 3          | 3.44 |
| EMC1     | ER Membrane Protein Complex Subunit 1                | 3.44 |
| NELFCD   | Negative Elongation Factor Complex Member C/D        | 3.44 |
| SPATA17  | Spermatogenesis Associated 17                        | 3.44 |
| RARS1    | Arginyl-TRNA Synthetase 1                            | 3.44 |
| NAA25    | N-Alpha-Acetyltransferase 25, NatB Auxiliary Subunit | 3.44 |
| KRT38    | Keratin 38                                           | 3.44 |
| GTSF1    | Gametocyte Specific Factor 1                         | 3.44 |
| PRDM10   | PR/SET Domain 10                                     | 3.44 |
| R3HDM1   | R3H Domain Containing 1                              | 3.44 |
| CWC15    | CWC15 Spliceosome Associated Protein Homolog         | 3.44 |
| OR3A3    | Olfactory Receptor Family 3 Subfamily A Member 3     | 3.44 |
| KRT27    | Keratin 27                                           | 3.44 |
| ZNF500   | Zinc Finger Protein 500                              | 3.44 |
| FAM71D   | Family With Sequence Similarity 71 Member D          | 3.44 |
| OR12D3   | Olfactory Receptor Family 12 Subfamily D Member 3    | 3.44 |
| PWWP2B   | PWWP Domain Containing 2B                            | 3.44 |
| C12orf40 | Chromosome 12 Open Reading Frame 40                  | 3.44 |

|              |                                                                   |      |
|--------------|-------------------------------------------------------------------|------|
| DEFB103B     | Defensin Beta 103B                                                | 3.44 |
| PRSS37       | Serine Protease 37                                                | 3.44 |
| CARNMT1      | Carnosine N-Methyltransferase 1                                   | 3.44 |
| LRP5L        | LDL Receptor Related Protein 5 Like                               | 3.44 |
| OR13H1       | Olfactory Receptor Family 13 Subfamily H Member 1                 | 3.44 |
| TMEM251      | Transmembrane Protein 251                                         | 3.44 |
| TMPRSS11F    | Transmembrane Serine Protease 11F                                 | 3.44 |
| FAM221B      | Family With Sequence Similarity 221 Member B                      | 3.44 |
| KRTAP4-8     | Keratin Associated Protein 4-8                                    | 3.44 |
| RETREG3      | Reticulophagy Regulator Family Member 3                           | 3.44 |
| MIR34A       | MicroRNA 34a                                                      | 3.44 |
| HOXC-AS2     | HOXC Cluster Antisense RNA 2                                      | 3.44 |
| TRB          | T Cell Receptor Beta Locus                                        | 3.44 |
| MIR4647      | MicroRNA 4647                                                     | 3.44 |
| MIR3689C     | MicroRNA 3689c                                                    | 3.44 |
| ARCI9        | Ichthyosis, Congenital, Autosomal Recessive 9                     | 3.44 |
| LOC112577531 | Sharpr-MPRA Regulatory Region 5904                                | 3.44 |
| C2           | Complement C2                                                     | 3.41 |
| SLAMF6       | SLAM Family Member 6                                              | 3.41 |
| SNRPD1       | Small Nuclear Ribonucleoprotein D1 Polypeptide                    | 3.41 |
| TNFSF13      | TNF Superfamily Member 13                                         | 3.3  |
| EGFR         | Epidermal Growth Factor Receptor                                  | 3.27 |
| ALPL         | Alkaline Phosphatase, Biomineralization Associated                | 3.22 |
| CDKN1B       | Cyclin Dependent Kinase Inhibitor 1B                              | 3.22 |
| CTSL         | Cathepsin L                                                       | 3.22 |
| IFIH1        | Interferon Induced With Helicase C Domain 1                       | 3.14 |
| CYP24A1      | Cytochrome P450 Family 24 Subfamily A Member 1                    | 3.14 |
| MAPT         | Microtubule Associated Protein Tau                                | 3.12 |
| ABCB6        | ATP Binding Cassette Subfamily B Member 6 (Langereis Blood Group) | 3.12 |
| PRDM1        | PR/SET Domain 1                                                   | 3.12 |
| TUBA4A       | Tubulin Alpha 4a                                                  | 3.12 |
| ITPR2        | Inositol 1,4,5-Trisphosphate Receptor Type 2                      | 3.12 |
| RAD23B       | RAD23 Homolog B, Nucleotide Excision Repair Protein               | 3.12 |
| WARS2        | Tryptophanyl TRNA Synthetase 2, Mitochondrial                     | 3.12 |
| PREP         | Prolyl Endopeptidase                                              | 3.12 |
| WNT6         | Wnt Family Member 6                                               | 3.12 |
| MBNL1        | Muscleblind Like Splicing Regulator 1                             | 3.12 |
| PRDM8        | PR/SET Domain 8                                                   | 3.12 |
| MIR629       | MicroRNA 629                                                      | 3.12 |
| LINC01432    | Long Intergenic Non-Protein Coding RNA 1432                       | 3.12 |

|          |                                                                        |      |
|----------|------------------------------------------------------------------------|------|
| KDR      | Kinase Insert Domain Receptor                                          | 3.08 |
| ITGA6    | Integrin Subunit Alpha 6                                               | 3.08 |
| EPO      | Erythropoietin                                                         | 3.08 |
| MAPK1    | Mitogen-Activated Protein Kinase 1                                     | 3.02 |
| BCR      | BCR Activator Of RhoGEF And GTPase                                     | 3    |
| PROS1    | Protein S                                                              | 3    |
| SLC27A4  | Solute Carrier Family 27 Member 4                                      | 3    |
| SLC19A1  | Solute Carrier Family 19 Member 1                                      | 3    |
| TACR1    | Tachykinin Receptor 1                                                  | 3    |
| ABCD3    | ATP Binding Cassette Subfamily D Member 3                              | 3    |
| SSB      | Small RNA Binding Exonuclease Protection Factor La                     | 3    |
| RO60     | Ro60, Y RNA Binding Protein                                            | 3    |
| TPMT     | Thiopurine S-Methyltransferase                                         | 2.98 |
| ZNF462   | Zinc Finger Protein 462                                                | 2.98 |
| NTF3     | Neurotrophin 3                                                         | 2.98 |
| CCDC88B  | Coiled-Coil Domain Containing 88B                                      | 2.98 |
| HDAC9    | Histone Deacetylase 9                                                  | 2.88 |
| SMAD3    | SMAD Family Member 3                                                   | 2.83 |
| AKT2     | AKT Serine/Threonine Kinase 2                                          | 2.81 |
| MTOR     | Mechanistic Target Of Rapamycin Kinase                                 | 2.81 |
| PIK3CD   | Phosphatidylinositol-4,5-Bisphosphate 3-Kinase Catalytic Subunit Delta | 2.81 |
| CCND1    | Cyclin D1                                                              | 2.81 |
| HMOX1    | Heme Oxygenase 1                                                       | 2.81 |
| MMP9     | Matrix Metalloproteinase 9                                             | 2.81 |
| FGFR4    | Fibroblast Growth Factor Receptor 4                                    | 2.81 |
| PRKG1    | Protein Kinase CGMP-Dependent 1                                        | 2.81 |
| SRC      | SRC Proto-Oncogene, Non-Receptor Tyrosine Kinase                       | 2.81 |
| TGFBR2   | Transforming Growth Factor Beta Receptor 2                             | 2.81 |
| CASP1    | Caspase 1                                                              | 2.81 |
| BRCA1    | BRCA1 DNA Repair Associated                                            | 2.81 |
| CDKN1A   | Cyclin Dependent Kinase Inhibitor 1A                                   | 2.81 |
| MYD88    | MYD88 Innate Immune Signal Transduction Adaptor                        | 2.81 |
| RARA     | Retinoic Acid Receptor Alpha                                           | 2.81 |
| STAT6    | Signal Transducer And Activator Of Transcription 6                     | 2.81 |
| PRKCA    | Protein Kinase C Alpha                                                 | 2.81 |
| BMP4     | Bone Morphogenetic Protein 4                                           | 2.81 |
| BRCA2    | BRCA2 DNA Repair Associated                                            | 2.81 |
| GNAQ     | G Protein Subunit Alpha Q                                              | 2.81 |
| SERPINA1 | Serpin Family A Member 1                                               | 2.81 |
| RB1      | RB Transcriptional Corepressor 1                                       | 2.81 |

|          |                                                                        |      |
|----------|------------------------------------------------------------------------|------|
| KCNH2    | Potassium Voltage-Gated Channel Subfamily H Member 2                   | 2.81 |
| ADRB2    | Adrenoceptor Beta 2                                                    | 2.81 |
| ABCA3    | ATP Binding Cassette Subfamily A Member 3                              | 2.81 |
| ACACA    | Acetyl-CoA Carboxylase Alpha                                           | 2.81 |
| CYP3A4   | Cytochrome P450 Family 3 Subfamily A Member 4                          | 2.81 |
| CREB1    | CAMP Responsive Element Binding Protein 1                              | 2.81 |
| CSK      | C-Terminal Src Kinase                                                  | 2.81 |
| CXCR2    | C-X-C Motif Chemokine Receptor 2                                       | 2.81 |
| HPRT1    | Hypoxanthine Phosphoribosyltransferase 1                               | 2.81 |
| SERPINC1 | Serpin Family C Member 1                                               | 2.81 |
| RPS19    | Ribosomal Protein S19                                                  | 2.81 |
| PI4KA    | Phosphatidylinositol 4-Kinase Alpha                                    | 2.81 |
| PIK3CG   | Phosphatidylinositol-4,5-Bisphosphate 3-Kinase Catalytic Subunit Gamma | 2.81 |
| GBA      | Glucosylceramidase Beta                                                | 2.81 |
| FAH      | Fumarylacetoacetate Hydrolase                                          | 2.81 |
| MECOM    | MDS1 And EVI1 Complex Locus                                            | 2.81 |
| ACADM    | Acyl-CoA Dehydrogenase Medium Chain                                    | 2.81 |
| HIF1A    | Hypoxia Inducible Factor 1 Subunit Alpha                               | 2.81 |
| DDX58    | DEXD/H-Box Helicase 58                                                 | 2.81 |
| RYR1     | Ryanodine Receptor 1                                                   | 2.81 |
| RPL5     | Ribosomal Protein L5                                                   | 2.81 |
| ISG15    | ISG15 Ubiquitin Like Modifier                                          | 2.81 |
| TRAF3    | TNF Receptor Associated Factor 3                                       | 2.81 |
| TTN      | Titin                                                                  | 2.81 |
| TUBB1    | Tubulin Beta 1 Class VI                                                | 2.81 |
| TYR      | Tyrosinase                                                             | 2.81 |
| IRF1     | Interferon Regulatory Factor 1                                         | 2.81 |
| ALAD     | Aminolevulinate Dehydratase                                            | 2.81 |
| GNAT1    | G Protein Subunit Alpha Transducin 1                                   | 2.81 |
| ANXA5    | Annexin A5                                                             | 2.81 |
| ALPP     | Alkaline Phosphatase, Placental                                        | 2.81 |
| FURIN    | Furin, Paired Basic Amino Acid Cleaving Enzyme                         | 2.81 |
| FXN      | Frataxin                                                               | 2.81 |
| MYBPC3   | Myosin Binding Protein C3                                              | 2.81 |
| LIG1     | DNA Ligase 1                                                           | 2.81 |
| UNG      | Uracil DNA Glycosylase                                                 | 2.81 |
| RASGRP1  | RAS Guanyl Releasing Protein 1                                         | 2.81 |
| DAG1     | Dystroglycan 1                                                         | 2.81 |
| ALAS2    | 5'-Aminolevulinate Synthase 2                                          | 2.81 |
| GALNT3   | Polypeptide N-Acetylgalactosaminyltransferase 3                        | 2.81 |

|          |                                                                               |      |
|----------|-------------------------------------------------------------------------------|------|
| LRP2     | LDL Receptor Related Protein 2                                                | 2.81 |
| FCER2    | Fc Fragment Of IgE Receptor II                                                | 2.81 |
| ALDH3A2  | Aldehyde Dehydrogenase 3 Family Member A2                                     | 2.81 |
| ACHE     | Acetylcholinesterase (Cartwright Blood Group)                                 | 2.81 |
| ACOX1    | Acyl-CoA Oxidase 1                                                            | 2.81 |
| ABCC6    | ATP Binding Cassette Subfamily C Member 6                                     | 2.81 |
| ADAMTS13 | ADAM Metallopeptidase With Thrombospondin Type 1 Motif 13                     | 2.81 |
| ACAT2    | Acetyl-CoA Acetyltransferase 2                                                | 2.81 |
| MGLL     | Monoglyceride Lipase                                                          | 2.81 |
| C1QA     | Complement C1q A Chain                                                        | 2.81 |
| CYP2R1   | Cytochrome P450 Family 2 Subfamily R Member 1                                 | 2.81 |
| HADHA    | Hydroxyacyl-CoA Dehydrogenase Trifunctional Multienzyme Complex Subunit Alpha | 2.81 |
| HBB      | Hemoglobin Subunit Beta                                                       | 2.81 |
| MSX1     | Msh Homeobox 1                                                                | 2.81 |
| RPL10    | Ribosomal Protein L10                                                         | 2.81 |
| CD38     | CD38 Molecule                                                                 | 2.81 |
| PCCA     | Propionyl-CoA Carboxylase Subunit Alpha                                       | 2.81 |
| SLC6A8   | Solute Carrier Family 6 Member 8                                              | 2.81 |
| PHYH     | Phytanoyl-CoA 2-Hydroxylase                                                   | 2.81 |
| RAD54L   | RAD54 Like                                                                    | 2.81 |
| CYP26B1  | Cytochrome P450 Family 26 Subfamily B Member 1                                | 2.81 |
| DLL1     | Delta Like Canonical Notch Ligand 1                                           | 2.81 |
| ITGAL    | Integrin Subunit Alpha L                                                      | 2.81 |
| KLF4     | Kruppel Like Factor 4                                                         | 2.81 |
| C1QB     | Complement C1q B Chain                                                        | 2.81 |
| C1QC     | Complement C1q C Chain                                                        | 2.81 |
| LRAT     | Lecithin Retinol Acyltransferase                                              | 2.81 |
| AGER     | Advanced Glycosylation End-Product Specific Receptor                          | 2.81 |
| MCCC1    | Methylcrotonoyl-CoA Carboxylase 1                                             | 2.81 |
| ABCA4    | ATP Binding Cassette Subfamily A Member 4                                     | 2.81 |
| ADCY2    | Adenylate Cyclase 2                                                           | 2.81 |
| LOX      | Lysyl Oxidase                                                                 | 2.81 |
| CX3CR1   | C-X3-C Motif Chemokine Receptor 1                                             | 2.81 |
| CTSG     | Cathepsin G                                                                   | 2.81 |
| CR1      | Complement C3b/C4b Receptor 1 (Knops Blood Group)                             | 2.81 |
| CST3     | Cystatin C                                                                    | 2.81 |
| CSTA     | Cystatin A                                                                    | 2.81 |
| HOXA1    | Homeobox A1                                                                   | 2.81 |
| ETFDH    | Electron Transfer Flavoprotein Dehydrogenase                                  | 2.81 |
| HLA-G    | Major Histocompatibility Complex, Class I, G                                  | 2.81 |

|           |                                                            |      |
|-----------|------------------------------------------------------------|------|
| HMBS      | Hydroxymethylbilane Synthase                               | 2.81 |
| CKM       | Creatine Kinase, M-Type                                    | 2.81 |
| HABP2     | Hyaluronan Binding Protein 2                               | 2.81 |
| MYO5B     | Myosin VB                                                  | 2.81 |
| CD274     | CD274 Molecule                                             | 2.81 |
| GAS6      | Growth Arrest Specific 6                                   | 2.81 |
| IL10RB    | Interleukin 10 Receptor Subunit Beta                       | 2.81 |
| SOCS3     | Suppressor Of Cytokine Signaling 3                         | 2.81 |
| SNRPN     | Small Nuclear Ribonucleoprotein Polypeptide N              | 2.81 |
| SAG       | S-Antigen Visual Arrestin                                  | 2.81 |
| PLIN1     | Perilipin 1                                                | 2.81 |
| OCRL      | OCRL Inositol Polyphosphate-5-Phosphatase                  | 2.81 |
| SLC34A1   | Solute Carrier Family 34 Member 1                          | 2.81 |
| SLC25A15  | Solute Carrier Family 25 Member 15                         | 2.81 |
| TNFRSF13C | TNF Receptor Superfamily Member 13C                        | 2.81 |
| RBP4      | Retinol Binding Protein 4                                  | 2.81 |
| KL        | Klotho                                                     | 2.81 |
| CYP26A1   | Cytochrome P450 Family 26 Subfamily A Member 1             | 2.81 |
| ORAI1     | ORAI Calcium Release-Activated Calcium Modulator 1         | 2.81 |
| ABCB7     | ATP Binding Cassette Subfamily B Member 7                  | 2.81 |
| ARF4      | ADP Ribosylation Factor 4                                  | 2.81 |
| FBL       | Fibrillarin                                                | 2.81 |
| ALOX12    | Arachidonate 12-Lipoxygenase, 12S Type                     | 2.81 |
| AGPS      | Alkylglycerone Phosphate Synthase                          | 2.81 |
| ADAMTS18  | ADAM Metalloproteinase With Thrombospondin Type 1 Motif 18 | 2.81 |
| ACAA2     | Acetyl-CoA Acyltransferase 2                               | 2.81 |
| CRABP2    | Cellular Retinoic Acid Binding Protein 2                   | 2.81 |
| CPOX      | Coproporphyrinogen Oxidase                                 | 2.81 |
| GC        | GC Vitamin D Binding Protein                               | 2.81 |
| CMA1      | Chymase 1                                                  | 2.81 |
| HAVCR2    | Hepatitis A Virus Cellular Receptor 2                      | 2.81 |
| CHI3L1    | Chitinase 3 Like 1                                         | 2.81 |
| CHIT1     | Chitinase 1                                                | 2.81 |
| DGAT2     | Diacylglycerol O-Acyltransferase 2                         | 2.81 |
| DNM3      | Dynamin 3                                                  | 2.81 |
| NAT2      | N-Acetyltransferase 2                                      | 2.81 |
| CD2AP     | CD2 Associated Protein                                     | 2.81 |
| CD70      | CD70 Molecule                                              | 2.81 |
| HLA-DPB1  | Major Histocompatibility Complex, Class II, DP Beta 1      | 2.81 |
| PEX19     | Peroxisomal Biogenesis Factor 19                           | 2.81 |
| IL18R1    | Interleukin 18 Receptor 1                                  | 2.81 |

|          |                                                           |      |
|----------|-----------------------------------------------------------|------|
| SFRP4    | Secreted Frizzled Related Protein 4                       | 2.81 |
| S100A9   | S100 Calcium Binding Protein A9                           | 2.81 |
| SMAD7    | SMAD Family Member 7                                      | 2.81 |
| PLIN2    | Perilipin 2                                               | 2.81 |
| TNFRSF25 | TNF Receptor Superfamily Member 25                        | 2.81 |
| UGCG     | UDP-Glucose Ceramide Glucosyltransferase                  | 2.81 |
| TAC1     | Tachykinin Precursor 1                                    | 2.81 |
| RAB2A    | RAB2A, Member RAS Oncogene Family                         | 2.81 |
| ITM2B    | Integral Membrane Protein 2B                              | 2.81 |
| TXNL4A   | Thioredoxin Like 4A                                       | 2.81 |
| DNASE1L3 | Deoxyribonuclease 1 Like 3                                | 2.81 |
| FANCM    | FA Complementation Group M                                | 2.81 |
| APOL1    | Apolipoprotein L1                                         | 2.81 |
| CX3CL1   | C-X3-C Motif Chemokine Ligand 1                           | 2.81 |
| CYP4F3   | Cytochrome P450 Family 4 Subfamily F Member 3             | 2.81 |
| CLCN5    | Chloride Voltage-Gated Channel 5                          | 2.81 |
| RFXANK   | Regulatory Factor X Associated Ankyrin Containing Protein | 2.81 |
| HBA2     | Hemoglobin Subunit Alpha 2                                | 2.81 |
| PEX3     | Peroxisomal Biogenesis Factor 3                           | 2.81 |
| INPP4A   | Inositol Polyphosphate-4-Phosphatase Type I A             | 2.81 |
| TNFRSF18 | TNF Receptor Superfamily Member 18                        | 2.81 |
| KLK6     | Kallikrein Related Peptidase 6                            | 2.81 |
| STX3     | Syntaxin 3                                                | 2.81 |
| GALNT11  | Polypeptide N-Acetylgalactosaminyltransferase 11          | 2.81 |
| GJA3     | Gap Junction Protein Alpha 3                              | 2.81 |
| GJC2     | Gap Junction Protein Gamma 2                              | 2.81 |
| CD164    | CD164 Molecule                                            | 2.81 |
| FCN3     | Ficolin 3                                                 | 2.81 |
| ALOX15B  | Arachidonate 15-Lipoxygenase Type B                       | 2.81 |
| ABCA2    | ATP Binding Cassette Subfamily A Member 2                 | 2.81 |
| CXCL13   | C-X-C Motif Chemokine Ligand 13                           | 2.81 |
| CRABP1   | Cellular Retinoic Acid Binding Protein 1                  | 2.81 |
| CAMP     | Cathelicidin Antimicrobial Peptide                        | 2.81 |
| HAVCR1   | Hepatitis A Virus Cellular Receptor 1                     | 2.81 |
| CHKA     | Choline Kinase Alpha                                      | 2.81 |
| CXCR5    | C-X-C Motif Chemokine Receptor 5                          | 2.81 |
| PEX10    | Peroxisomal Biogenesis Factor 10                          | 2.81 |
| PEX26    | Peroxisomal Biogenesis Factor 26                          | 2.81 |
| IL21R    | Interleukin 21 Receptor                                   | 2.81 |
| SHOC2    | SHOC2 Leucine Rich Repeat Scaffold Protein                | 2.81 |
| SAR1A    | Secretion Associated Ras Related GTPase 1A                | 2.81 |



|          |                                                             |      |
|----------|-------------------------------------------------------------|------|
| PLIN3    | Perilipin 3                                                 | 2.81 |
| SRSF1    | Serine And Arginine Rich Splicing Factor 1                  | 2.81 |
| U2AF1    | U2 Small Nuclear RNA Auxiliary Factor 1                     | 2.81 |
| TERF1    | Telomeric Repeat Binding Factor 1                           | 2.81 |
| PTX3     | Pentraxin 3                                                 | 2.81 |
| POLI     | DNA Polymerase Iota                                         | 2.81 |
| HSPA4    | Heat Shock Protein Family A (Hsp70) Member 4                | 2.81 |
| TFF3     | Trefoil Factor 3                                            | 2.81 |
| TGM5     | Transglutaminase 5                                          | 2.81 |
| GHRH     | Growth Hormone Releasing Hormone                            | 2.81 |
| FCN2     | Ficolin 2                                                   | 2.81 |
| CXCL11   | C-X-C Motif Chemokine Ligand 11                             | 2.81 |
| CYBRD1   | Cytochrome B Reductase 1                                    | 2.81 |
| CKAP5    | Cytoskeleton Associated Protein 5                           | 2.81 |
| GRHL2    | Grainyhead Like Transcription Factor 2                      | 2.81 |
| EME1     | Essential Meiotic Structure-Specific Endonuclease 1         | 2.81 |
| EIF6     | Eukaryotic Translation Initiation Factor 6                  | 2.81 |
| HLA-DPA1 | Major Histocompatibility Complex, Class II, DP Alpha 1      | 2.81 |
| SNRPA    | Small Nuclear Ribonucleoprotein Polypeptide A               | 2.81 |
| UBA6     | Ubiquitin Like Modifier Activating Enzyme 6                 | 2.81 |
| UPF1     | UPF1 RNA Helicase And ATPase                                | 2.81 |
| STRA6    | Signaling Receptor And Transporter Of Retinol STRA6         | 2.81 |
| RBP3     | Retinol Binding Protein 3                                   | 2.81 |
| TERF2    | Telomeric Repeat Binding Factor 2                           | 2.81 |
| UTRN     | Utrophin                                                    | 2.81 |
| CCRL2    | C-C Motif Chemokine Receptor Like 2                         | 2.81 |
| ATE1     | Arginyltransferase 1                                        | 2.81 |
| ABCA6    | ATP Binding Cassette Subfamily A Member 6                   | 2.81 |
| ABCA8    | ATP Binding Cassette Subfamily A Member 8                   | 2.81 |
| ADGRG1   | Adhesion G Protein-Coupled Receptor G1                      | 2.81 |
| FRAS1    | Fraser Extracellular Matrix Complex Subunit 1               | 2.81 |
| LY9      | Lymphocyte Antigen 9                                        | 2.81 |
| DOLK     | Dolichol Kinase                                             | 2.81 |
| RPGRIP1L | RPGRIP1 Like                                                | 2.81 |
| PEX12    | Peroxisomal Biogenesis Factor 12                            | 2.81 |
| IL23A    | Interleukin 23 Subunit Alpha                                | 2.81 |
| IFIT3    | Interferon Induced Protein With Tetratricopeptide Repeats 3 | 2.81 |
| NIPA1    | NIPA Magnesium Transporter 1                                | 2.81 |
| SLX4     | SLX4 Structure-Specific Endonuclease Subunit                | 2.81 |
| SLC25A17 | Solute Carrier Family 25 Member 17                          | 2.81 |
| SRSF6    | Serine And Arginine Rich Splicing Factor 6                  | 2.81 |

|         |                                                                                      |      |
|---------|--------------------------------------------------------------------------------------|------|
| LALBA   | Lactalbumin Alpha                                                                    | 2.81 |
| CD1E    | CD1e Molecule                                                                        | 2.81 |
| ZFYVE26 | Zinc Finger FYVE-Type Containing 26                                                  | 2.81 |
| WAC     | WW Domain Containing Adaptor With Coiled-Coil                                        | 2.81 |
| GIMAP4  | GTPase, IMAP Family Member 4                                                         | 2.81 |
| RHOJ    | Ras Homolog Family Member J                                                          | 2.81 |
| HNRNPAB | Heterogeneous Nuclear Ribonucleoprotein A/B                                          | 2.81 |
| CMPK2   | Cytidine/Uridine Monophosphate Kinase 2                                              | 2.81 |
| IL17D   | Interleukin 17D                                                                      | 2.81 |
| PEX16   | Peroxisomal Biogenesis Factor 16                                                     | 2.81 |
| SUMO4   | Small Ubiquitin Like Modifier 4                                                      | 2.81 |
| MCM10   | Minichromosome Maintenance 10 Replication Initiation Factor                          | 2.81 |
| CAPN12  | Calpain 12                                                                           | 2.81 |
| ADPRH   | ADP-Ribosylarginine Hydrolase                                                        | 2.81 |
| ABHD4   | Abhydrolase Domain Containing 4, N-Acyl Phospholipase B                              | 2.81 |
| DSPP    | Dentin Sialophosphoprotein                                                           | 2.81 |
| DYNLT1  | Dynein Light Chain Tctex-Type 1                                                      | 2.81 |
| IBSP    | Integrin Binding Sialoprotein                                                        | 2.81 |
| RPL38   | Ribosomal Protein L38                                                                | 2.81 |
| TRIM39  | Tripartite Motif Containing 39                                                       | 2.81 |
| TRUB1   | TruB Pseudouridine Synthase Family Member 1                                          | 2.81 |
| LIN9    | Lin-9 DREAM MuvB Core Complex Component                                              | 2.81 |
| SYNM    | Synemin                                                                              | 2.81 |
| TCEA2   | Transcription Elongation Factor A2                                                   | 2.81 |
| KLK14   | Kallikrein Related Peptidase 14                                                      | 2.81 |
| NHS     | NHS Actin Remodeling Regulator                                                       | 2.81 |
| THRSP   | Thyroid Hormone Responsive                                                           | 2.81 |
| MBOAT2  | Membrane Bound O-Acyltransferase Domain Containing 2                                 | 2.81 |
| BLOC1S1 | Biogenesis Of Lysosomal Organelles Complex 1 Subunit 1                               | 2.81 |
| GIMAP5  | GTPase, IMAP Family Member 5                                                         | 2.81 |
| ERAS    | ES Cell Expressed Ras                                                                | 2.81 |
| CD52    | CD52 Molecule                                                                        | 2.81 |
| NIPA2   | NIPA Magnesium Transporter 2                                                         | 2.81 |
| KIR2DL1 | Killer Cell Immunoglobulin Like Receptor, Two Ig Domains And Long Cytoplasmic Tail 1 | 2.81 |
| ZNF750  | Zinc Finger Protein 750                                                              | 2.81 |
| ACKR4   | Atypical Chemokine Receptor 4                                                        | 2.81 |
| GIMAP2  | GTPase, IMAP Family Member 2                                                         | 2.81 |
| EPSTI1  | Epithelial Stromal Interaction 1                                                     | 2.81 |
| RGS9BP  | Regulator Of G Protein Signaling 9 Binding Protein                                   | 2.81 |
| CSN3    | Casein Kappa                                                                         | 2.81 |

|         |                                                       |      |
|---------|-------------------------------------------------------|------|
| PEX5L   | Peroxisomal Biogenesis Factor 5 Like                  | 2.81 |
| NPW     | Neuropeptide W                                        | 2.81 |
| SOX7    | SRY-Box Transcription Factor 7                        | 2.81 |
| ENOSF1  | Enolase Superfamily Member 1                          | 2.81 |
| PNPLA7  | Patatin Like Phospholipase Domain Containing 7        | 2.81 |
| NUDT10  | Nudix Hydrolase 10                                    | 2.81 |
| TUT1    | Terminal Uridyl Transferase 1, U6 SnRNA-Specific      | 2.81 |
| UNK     | Unk Zinc Finger                                       | 2.81 |
| MTHFSD  | Methenyltetrahydrofolate Synthetase Domain Containing | 2.81 |
| SCAF4   | SR-Related CTD Associated Factor 4                    | 2.81 |
| IARS1   | Isoleucyl-TRNA Synthetase 1                           | 2.81 |
| UVSSA   | UV Stimulated Scaffold Protein A                      | 2.81 |
| LMLN    | Leishmanolysin Like Peptidase                         | 2.81 |
| ACTRT3  | Actin Related Protein T3                              | 2.81 |
| ADA2    | Adenosine Deaminase 2                                 | 2.81 |
| SNU13   | Small Nuclear Ribonucleoprotein 13                    | 2.81 |
| NIPAL2  | NIPA Like Domain Containing 2                         | 2.81 |
| PNPLA5  | Patatin Like Phospholipase Domain Containing 5        | 2.81 |
| TTC7B   | Tetratricopeptide Repeat Domain 7B                    | 2.81 |
| KRT72   | Keratin 72                                            | 2.81 |
| AKNAD1  | AKNA Domain Containing 1                              | 2.81 |
| LRRC14  | Leucine Rich Repeat Containing 14                     | 2.81 |
| NAV3    | Neuron Navigator 3                                    | 2.81 |
| CNTD1   | Cyclin N-Terminal Domain Containing 1                 | 2.81 |
| PRR16   | Proline Rich 16                                       | 2.81 |
| PLIN5   | Perilipin 5                                           | 2.81 |
| SHQ1    | SHQ1, H/ACA Ribonucleoprotein Assembly Factor         | 2.81 |
| JRKL    | JRK Like                                              | 2.81 |
| SYNC    | Syncoilin, Intermediate Filament Protein              | 2.81 |
| EFR3B   | EFR3 Homolog B                                        | 2.81 |
| ZFAND4  | Zinc Finger AN1-Type Containing 4                     | 2.81 |
| VNN3    | Vanin 3                                               | 2.81 |
| CCDC180 | Coiled-Coil Domain Containing 180                     | 2.81 |
| ABHD14A | Abhydrolase Domain Containing 14A                     | 2.81 |
| CWF19L2 | CWF19 Like Cell Cycle Control Factor 2                | 2.81 |
| PLPBP   | Pyridoxal Phosphate Binding Protein                   | 2.81 |
| ISX     | Intestine Specific Homeobox                           | 2.81 |
| STN1    | STN1 Subunit Of CST Complex                           | 2.81 |
| R3HCC1L | R3H Domain And Coiled-Coil Containing 1 Like          | 2.81 |
| H2AC20  | H2A Clustered Histone 20                              | 2.81 |
| CGB3    | Chorionic Gonadotropin Subunit Beta 3                 | 2.81 |

|              |                                                         |      |
|--------------|---------------------------------------------------------|------|
| H2BC21       | H2B Clustered Histone 21                                | 2.81 |
| MT-ATP6      | Mitochondrially Encoded ATP Synthase Membrane Subunit 6 | 2.81 |
| OR2T1        | Olfactory Receptor Family 2 Subfamily T Member 1        | 2.81 |
| KPRP         | Keratinocyte Proline Rich Protein                       | 2.81 |
| CLEC2A       | C-Type Lectin Domain Family 2 Member A                  | 2.81 |
| OR2M2        | Olfactory Receptor Family 2 Subfamily M Member 2        | 2.81 |
| ABHD16B      | Abhydrolase Domain Containing 16B                       | 2.81 |
| ANKRD20A1    | Ankyrin Repeat Domain 20 Family Member A1               | 2.81 |
| DEFB103A     | Defensin Beta 103A                                      | 2.81 |
| IL17REL      | Interleukin 17 Receptor E Like                          | 2.81 |
| SPRR2B       | Small Proline Rich Protein 2B                           | 2.81 |
| ERICH6B      | Glutamate Rich 6B                                       | 2.81 |
| C1orf141     | Chromosome 1 Open Reading Frame 141                     | 2.81 |
| OR2T12       | Olfactory Receptor Family 2 Subfamily T Member 12       | 2.81 |
| UPK3B        | Uroplakin 3B                                            | 2.81 |
| RAB40AL      | RAB40A Like                                             | 2.81 |
| GPR33        | G Protein-Coupled Receptor 33                           | 2.81 |
| LCE5A        | Late Cornified Envelope 5A                              | 2.81 |
| TMEM244      | Transmembrane Protein 244                               | 2.81 |
| MIR125A      | MicroRNA 125a                                           | 2.81 |
| MIR200C      | MicroRNA 200c                                           | 2.81 |
| MIRLET7A1    | MicroRNA Let-7a-1                                       | 2.81 |
| MIR142       | MicroRNA 142                                            | 2.81 |
| MIR199A1     | MicroRNA 199a-1                                         | 2.81 |
| MIR574       | MicroRNA 574                                            | 2.81 |
| SCARNA13     | Small Cajal Body-Specific RNA 13                        | 2.81 |
| SPATA41      | Spermatogenesis Associated 41                           | 2.81 |
| SNORA64      | Small Nucleolar RNA, H/ACA Box 64                       | 2.81 |
| RNU6ATAC     | RNA, U6atac Small Nuclear (U12-Dependent Splicing)      | 2.81 |
| MIR493       | MicroRNA 493                                            | 2.81 |
| SNORA75      | Small Nucleolar RNA, H/ACA Box 75                       | 2.81 |
| C4B_2        | Complement Component 4B (Chido Blood Group), Copy 2     | 2.81 |
| SCARNA23     | Small Cajal Body-Specific RNA 23                        | 2.81 |
| DSG1-AS1     | DSG1 Antisense RNA 1                                    | 2.81 |
| MIR4451      | MicroRNA 4451                                           | 2.81 |
| MIR3671      | MicroRNA 3671                                           | 2.81 |
| MIR3975      | MicroRNA 3975                                           | 2.81 |
| SNHG31       | Small Nucleolar RNA Host Gene 31                        | 2.81 |
| LOC102724404 | Uncharacterized LOC102724404                            | 2.81 |
| THM          | Thymoma                                                 | 2.81 |
| LOC110806306 | Telomerase RNA Component (TERC) Promoter                | 2.81 |

|              |                                                                    |      |
|--------------|--------------------------------------------------------------------|------|
| ECTD7        | Ectodermal Dysplasia 7, Hair/Nail Type                             | 2.81 |
| LI5          | Lamellar Ichthyosis 5                                              | 2.81 |
| LOC110806263 | TERT 5' Regulatory Region                                          | 2.81 |
| LOC107882126 | TGM1 Promoter Region                                               | 2.81 |
| PRKD1        | Protein Kinase D1                                                  | 2.79 |
| FYN          | FYN Proto-Oncogene, Src Family Tyrosine Kinase                     | 2.79 |
| FGF10        | Fibroblast Growth Factor 10                                        | 2.79 |
| PGD          | Phosphogluconate Dehydrogenase                                     | 2.79 |
| CYP2C19      | Cytochrome P450 Family 2 Subfamily C Member 19                     | 2.79 |
| SH2B3        | SH2B Adaptor Protein 3                                             | 2.79 |
| PTPN2        | Protein Tyrosine Phosphatase Non-Receptor Type 2                   | 2.79 |
| RASA1        | RAS P21 Protein Activator 1                                        | 2.79 |
| HRH1         | Histamine Receptor H1                                              | 2.79 |
| IGFBP3       | Insulin Like Growth Factor Binding Protein 3                       | 2.79 |
| ATG5         | Autophagy Related 5                                                | 2.79 |
| IL12B        | Interleukin 12B                                                    | 2.79 |
| TET2         | Tet Methylcytosine Dioxygenase 2                                   | 2.79 |
| SOC3         | Suppressor Of Cytokine Signaling 1                                 | 2.79 |
| FOXO1        | Forkhead Box O1                                                    | 2.79 |
| RPS26        | Ribosomal Protein S26                                              | 2.79 |
| FANCI        | FA Complementatation Group I                                       | 2.79 |
| EMG1         | EMG1 N1-Specific Pseudouridine Methyltransferase                   | 2.79 |
| IL22         | Interleukin 22                                                     | 2.79 |
| LSM2         | LSM2 Homolog, U6 Small Nuclear RNA And mRNA Degradation Associated | 2.79 |
| MDC1         | Mediator Of DNA Damage Checkpoint 1                                | 2.79 |
| RASA2        | RAS P21 Protein Activator 2                                        | 2.79 |
| HEPH         | Hephaestin                                                         | 2.79 |
| CDC5L        | Cell Division Cycle 5 Like                                         | 2.79 |
| PMEL         | Premelanosome Protein                                              | 2.79 |
| ADAD1        | Adenosine Deaminase Domain Containing 1                            | 2.79 |
| KIAA1217     | KIAA1217                                                           | 2.79 |
| CEP83        | Centrosomal Protein 83                                             | 2.79 |
| DCLRE1B      | DNA Cross-Link Repair 1B                                           | 2.79 |
| PDZRN3       | PDZ Domain Containing Ring Finger 3                                | 2.79 |
| KIAA1109     | KIAA1109                                                           | 2.79 |
| SPIN2B       | Spindlin Family Member 2B                                          | 2.79 |
| SPIN2A       | Spindlin Family Member 2A                                          | 2.79 |
| DSG3         | Desmoglein 3                                                       | 2.75 |
| CDH1         | Cadherin 1                                                         | 2.72 |
| VIM          | Vimentin                                                           | 2.72 |

|          |                                                        |      |
|----------|--------------------------------------------------------|------|
| PTGS2    | Prostaglandin-Endoperoxide Synthase 2                  | 2.72 |
| SMAD1    | SMAD Family Member 1                                   | 2.66 |
| GPT      | Glutamic--Pyruvic Transaminase                         | 2.66 |
| SMAD5    | SMAD Family Member 5                                   | 2.66 |
| CTH      | Cystathionine Gamma-Lyase                              | 2.65 |
| CACNB4   | Calcium Voltage-Gated Channel Auxiliary Subunit Beta 4 | 2.65 |
| TRIO     | Trio Rho Guanine Nucleotide Exchange Factor            | 2.65 |
| ALOX5AP  | Arachidonate 5-Lipoxygenase Activating Protein         | 2.65 |
| SERPINB5 | Serpin Family B Member 5                               | 2.65 |
| CDH13    | Cadherin 13                                            | 2.65 |
| BCL9     | BCL9 Transcription Coactivator                         | 2.65 |
| ME3      | Malic Enzyme 3                                         | 2.65 |
| CDH7     | Cadherin 7                                             | 2.65 |
| DENND1A  | DENN Domain Containing 1A                              | 2.65 |
| PCDH15   | Protocadherin Related 15                               | 2.65 |
| STAM2    | Signal Transducing Adaptor Molecule 2                  | 2.65 |
| CAMKMT   | Calmodulin-Lysine N-Methyltransferase                  | 2.65 |
| PRPF18   | Pre-mRNA Processing Factor 18                          | 2.65 |
| LCORL    | Ligand Dependent Nuclear Receptor Corepressor Like     | 2.65 |
| KLHL25   | Kelch Like Family Member 25                            | 2.65 |
| TMEM132C | Transmembrane Protein 132C                             | 2.65 |
| C3orf56  | Chromosome 3 Open Reading Frame 56                     | 2.65 |
| RPL10AP9 | Ribosomal Protein L10a Pseudogene 9                    | 2.65 |
| TWIST1   | Twist Family BHLH Transcription Factor 1               | 2.64 |
| SLC14A2  | Solute Carrier Family 14 Member 2                      | 2.64 |
| SETBP1   | SET Binding Protein 1                                  | 2.64 |
| C1orf127 | Chromosome 1 Open Reading Frame 127                    | 2.64 |
| SSPN     | Sarcospan                                              | 2.64 |
| SPPL2C   | Signal Peptide Peptidase Like 2C                       | 2.64 |
| MAPT-AS1 | MAPT Antisense RNA 1                                   | 2.64 |
| DCN      | Decorin                                                | 2.58 |
| LAMB1    | Laminin Subunit Beta 1                                 | 2.58 |
| OSMR     | Oncostatin M Receptor                                  | 2.58 |
| NR3C2    | Nuclear Receptor Subfamily 3 Group C Member 2          | 2.56 |
| PLCD3    | Phospholipase C Delta 3                                | 2.44 |
| PRKCE    | Protein Kinase C Epsilon                               | 2.39 |
| PGR      | Progesterone Receptor                                  | 2.39 |
| IL6R     | Interleukin 6 Receptor                                 | 2.39 |
| LGMN     | Legumain                                               | 2.39 |
| CTSV     | Cathepsin V                                            | 2.39 |
| HMU      | Hypotrichosis, Marie Unna Type                         | 2.39 |

|              |                                                  |      |
|--------------|--------------------------------------------------|------|
| NCOA1        | Nuclear Receptor Coactivator 1                   | 2.39 |
| XDH          | Xanthine Dehydrogenase                           | 2.38 |
| LOC102723878 | Uncharacterized LOC102723878                     | 2.38 |
| ERBB2        | Erb-B2 Receptor Tyrosine Kinase 2                | 2.36 |
| LEF1         | Lymphoid Enhancer Binding Factor 1               | 2.31 |
| FOXA2        | Forkhead Box A2                                  | 2.3  |
| MED4         | Mediator Complex Subunit 4                       | 2.3  |
| RAET1M       | Retinoic Acid Early Transcript 1M Pseudogene     | 2.3  |
| KRT18P39     | Keratin 18 Pseudogene 39                         | 2.3  |
| SERPINE1     | Serpin Family E Member 1                         | 2.25 |
| ABCC2        | ATP Binding Cassette Subfamily C Member 2        | 2.25 |
| MC4R         | Melanocortin 4 Receptor                          | 2.25 |
| RPL41P1      | Ribosomal Protein L41 Pseudogene 1               | 2.22 |
| FLT3         | Fms Related Receptor Tyrosine Kinase 3           | 2.18 |
| NGF          | Nerve Growth Factor                              | 2.18 |
| PARP1        | Poly(ADP-Ribose) Polymerase 1                    | 2.18 |
| UGT1A1       | UDP Glucuronosyltransferase Family 1 Member A1   | 2.18 |
| BDNF         | Brain Derived Neurotrophic Factor                | 2.18 |
| HSPA8        | Heat Shock Protein Family A (Hsp70) Member 8     | 2.18 |
| ENTPD1       | Ectonucleoside Triphosphate Diphosphohydrolase 1 | 2.18 |
| F3           | Coagulation Factor III, Tissue Factor            | 2.18 |
| IDO1         | Indoleamine 2,3-Dioxygenase 1                    | 2.18 |
| HMGR         | 3-Hydroxy-3-Methylglutaryl-CoA Reductase         | 2.18 |
| NTF4         | Neurotrophin 4                                   | 2.18 |
| VIP          | Vasoactive Intestinal Peptide                    | 2.18 |
| RNF216       | Ring Finger Protein 216                          | 2.18 |
| SST          | Somatostatin                                     | 2.18 |
| DSC3         | Desmocollin 3                                    | 2.18 |
| HLA-E        | Major Histocompatibility Complex, Class I, E     | 2.18 |
| XRCC3        | X-Ray Repair Cross Complementing 3               | 2.18 |
| ABCD2        | ATP Binding Cassette Subfamily D Member 2        | 2.18 |
| PRKN         | Parkin RBR E3 Ubiquitin Protein Ligase           | 2.18 |
| PMP22        | Peripheral Myelin Protein 22                     | 2.18 |
| PTMA         | Prothymosin Alpha                                | 2.18 |
| IL31         | Interleukin 31                                   | 2.18 |
| UTP4         | UTP4 Small Subunit Processome Component          | 2.18 |
| PDGFRA       | Platelet Derived Growth Factor Receptor Alpha    | 1.99 |
| MAP2K1       | Mitogen-Activated Protein Kinase Kinase 1        | 1.99 |
| IGF1R        | Insulin Like Growth Factor 1 Receptor            | 1.99 |
| MAP2K2       | Mitogen-Activated Protein Kinase Kinase 2        | 1.99 |
| CHEK2        | Checkpoint Kinase 2                              | 1.99 |

|         |                                                       |      |
|---------|-------------------------------------------------------|------|
| MMP2    | Matrix Metallopeptidase 2                             | 1.99 |
| RET     | Ret Proto-Oncogene                                    | 1.99 |
| CASP8   | Caspase 8                                             | 1.99 |
| MDM2    | MDM2 Proto-Oncogene                                   | 1.99 |
| FLT4    | Fms Related Receptor Tyrosine Kinase 4                | 1.99 |
| CTSD    | Cathepsin D                                           | 1.99 |
| PSEN1   | Presenilin 1                                          | 1.99 |
| RPS6KA3 | Ribosomal Protein S6 Kinase A3                        | 1.99 |
| MAPK14  | Mitogen-Activated Protein Kinase 14                   | 1.99 |
| MAP3K7  | Mitogen-Activated Protein Kinase Kinase Kinase 7      | 1.99 |
| CTSB    | Cathepsin B                                           | 1.99 |
| APP     | Amyloid Beta Precursor Protein                        | 1.99 |
| CFTR    | CF Transmembrane Conductance Regulator                | 1.99 |
| MMP3    | Matrix Metallopeptidase 3                             | 1.99 |
| MMP14   | Matrix Metallopeptidase 14                            | 1.99 |
| GRIN2A  | Glutamate Ionotropic Receptor NMDA Type Subunit 2A    | 1.99 |
| CDC42   | Cell Division Cycle 42                                | 1.99 |
| PLCG2   | Phospholipase C Gamma 2                               | 1.99 |
| PTPN1   | Protein Tyrosine Phosphatase Non-Receptor Type 1      | 1.99 |
| ITK     | IL2 Inducible T Cell Kinase                           | 1.99 |
| CASP7   | Caspase 7                                             | 1.99 |
| FTH1    | Ferritin Heavy Chain 1                                | 1.99 |
| GLUD1   | Glutamate Dehydrogenase 1                             | 1.99 |
| MAPK8   | Mitogen-Activated Protein Kinase 8                    | 1.99 |
| APOE    | Apolipoprotein E                                      | 1.99 |
| EP300   | E1A Binding Protein P300                              | 1.99 |
| AHCY    | Adenosylhomocysteinase                                | 1.99 |
| EPHA4   | EPH Receptor A4                                       | 1.99 |
| BMPR1B  | Bone Morphogenetic Protein Receptor Type 1B           | 1.99 |
| BMPR2   | Bone Morphogenetic Protein Receptor Type 2            | 1.99 |
| MERTK   | MER Proto-Oncogene, Tyrosine Kinase                   | 1.99 |
| ACVRL1  | Activin A Receptor Like Type 1                        | 1.99 |
| FOS     | Fos Proto-Oncogene, AP-1 Transcription Factor Subunit | 1.99 |
| MGMT    | O-6-Methylguanine-DNA Methyltransferase               | 1.99 |
| FN1     | Fibronectin 1                                         | 1.99 |
| MME     | Membrane Metalloendopeptidase                         | 1.99 |
| CHEK1   | Checkpoint Kinase 1                                   | 1.99 |
| MMP13   | Matrix Metallopeptidase 13                            | 1.99 |
| GRM1    | Glutamate Metabotropic Receptor 1                     | 1.99 |
| NOTCH2  | Notch Receptor 2                                      | 1.99 |
| SCN5A   | Sodium Voltage-Gated Channel Alpha Subunit 5          | 1.99 |



|         |                                                               |      |
|---------|---------------------------------------------------------------|------|
| NFKBIA  | NFKB Inhibitor Alpha                                          | 1.99 |
| RPS6KA1 | Ribosomal Protein S6 Kinase A1                                | 1.99 |
| PTH1R   | Parathyroid Hormone 1 Receptor                                | 1.99 |
| RELA    | RELA Proto-Oncogene, NF-KB Subunit                            | 1.99 |
| COL1A1  | Collagen Type I Alpha 1 Chain                                 | 1.99 |
| MSH6    | MutS Homolog 6                                                | 1.99 |
| SNCA    | Synuclein Alpha                                               | 1.99 |
| JAG1    | Jagged Canonical Notch Ligand 1                               | 1.99 |
| LRRK2   | Leucine Rich Repeat Kinase 2                                  | 1.99 |
| FLNA    | Filamin A                                                     | 1.99 |
| GRB2    | Growth Factor Receptor Bound Protein 2                        | 1.99 |
| NOS2    | Nitric Oxide Synthase 2                                       | 1.99 |
| PLK1    | Polo Like Kinase 1                                            | 1.99 |
| PIK3R2  | Phosphoinositide-3-Kinase Regulatory Subunit 2                | 1.99 |
| JUN     | Jun Proto-Oncogene, AP-1 Transcription Factor Subunit         | 1.99 |
| KCNQ1   | Potassium Voltage-Gated Channel Subfamily Q Member 1          | 1.99 |
| GATA4   | GATA Binding Protein 4                                        | 1.99 |
| CACNA1C | Calcium Voltage-Gated Channel Subunit Alpha1 C                | 1.99 |
| AXIN2   | Axin 2                                                        | 1.99 |
| ANXA2   | Annexin A2                                                    | 1.99 |
| ATP2A1  | ATPase Sarcoplasmic/Endoplasmic Reticulum Ca2+ Transporting 1 | 1.99 |
| MDH2    | Malate Dehydrogenase 2                                        | 1.99 |
| ADCY1   | Adenylate Cyclase 1                                           | 1.99 |
| GALK1   | Galactokinase 1                                               | 1.99 |
| CYP2D6  | Cytochrome P450 Family 2 Subfamily D Member 6                 | 1.99 |
| GLA     | Galactosidase Alpha                                           | 1.99 |
| GSR     | Glutathione-Disulfide Reductase                               | 1.99 |
| GSN     | Gelsolin                                                      | 1.99 |
| CHRNA4  | Cholinergic Receptor Nicotinic Alpha 4 Subunit                | 1.99 |
| MLH1    | MutL Homolog 1                                                | 1.99 |
| MSH2    | MutS Homolog 2                                                | 1.99 |
| RPL11   | Ribosomal Protein L11                                         | 1.99 |
| NCF1    | Neutrophil Cytosolic Factor 1                                 | 1.99 |
| PPP2CA  | Protein Phosphatase 2 Catalytic Subunit Alpha                 | 1.99 |
| PDE4D   | Phosphodiesterase 4D                                          | 1.99 |
| PDE3A   | Phosphodiesterase 3A                                          | 1.99 |
| NFE2L2  | Nuclear Factor, Erythroid 2 Like 2                            | 1.99 |
| SLC12A6 | Solute Carrier Family 12 Member 6                             | 1.99 |
| TNNI3   | Troponin I3, Cardiac Type                                     | 1.99 |
| TUBA1A  | Tubulin Alpha 1a                                              | 1.99 |
| KCNN4   | Potassium Calcium-Activated Channel Subfamily N Member 4      | 1.99 |

|         |                                                  |      |
|---------|--------------------------------------------------|------|
| STIM1   | Stromal Interaction Molecule 1                   | 1.99 |
| TGM2    | Transglutaminase 2                               | 1.99 |
| VRK1    | VRK Serine/Threonine Kinase 1                    | 1.99 |
| VWF     | Von Willebrand Factor                            | 1.99 |
| GHR     | Growth Hormone Receptor                          | 1.99 |
| AQP3    | Aquaporin 3 (Gill Blood Group)                   | 1.99 |
| BACE1   | Beta-Secretase 1                                 | 1.99 |
| FADD    | Fas Associated Via Death Domain                  | 1.99 |
| FGA     | Fibrinogen Alpha Chain                           | 1.99 |
| ATP7B   | ATPase Copper Transporting Beta                  | 1.99 |
| FANCC   | FA Complementation Group C                       | 1.99 |
| FANCD2  | FA Complementation Group D2                      | 1.99 |
| ADSL    | Adenylosuccinate Lyase                           | 1.99 |
| BLNK    | B Cell Linker                                    | 1.99 |
| FGF8    | Fibroblast Growth Factor 8                       | 1.99 |
| EPHX1   | Epoxide Hydrolase 1                              | 1.99 |
| LYZ     | Lysozyme                                         | 1.99 |
| CYBA    | Cytochrome B-245 Alpha Chain                     | 1.99 |
| CYBB    | Cytochrome B-245 Beta Chain                      | 1.99 |
| CYP1A1  | Cytochrome P450 Family 1 Subfamily A Member 1    | 1.99 |
| CTNNA1  | Catenin Alpha 1                                  | 1.99 |
| CDKN2B  | Cyclin Dependent Kinase Inhibitor 2B             | 1.99 |
| CD3E    | CD3e Molecule                                    | 1.99 |
| CD44    | CD44 Molecule (Indian Blood Group)               | 1.99 |
| CD55    | CD55 Molecule (Cromer Blood Group)               | 1.99 |
| HMOX2   | Heme Oxygenase 2                                 | 1.99 |
| COMP    | Cartilage Oligomeric Matrix Protein              | 1.99 |
| MITF    | Melanocyte Inducing Transcription Factor         | 1.99 |
| GRM5    | Glutamate Metabotropic Receptor 5                | 1.99 |
| GATA2   | GATA Binding Protein 2                           | 1.99 |
| IKZF1   | IKAROS Family Zinc Finger 1                      | 1.99 |
| PRNP    | Prion Protein                                    | 1.99 |
| SOS1    | SOS Ras/Rac Guanine Nucleotide Exchange Factor 1 | 1.99 |
| RYR2    | Ryanodine Receptor 2                             | 1.99 |
| RRM1    | Ribonucleotide Reductase Catalytic Subunit M1    | 1.99 |
| NOG     | Noggin                                           | 1.99 |
| ENO2    | Enolase 2                                        | 1.99 |
| OGG1    | 8-Oxoguanine DNA Glycosylase                     | 1.99 |
| PKLR    | Pyruvate Kinase L/R                              | 1.99 |
| SLC11A2 | Solute Carrier Family 11 Member 2                | 1.99 |

|           |                                                                          |      |
|-----------|--------------------------------------------------------------------------|------|
| PIK3C2A   | Phosphatidylinositol-4-Phosphate 3-Kinase Catalytic Subunit Type 2 Alpha | 1.99 |
| UBE2N     | Ubiquitin Conjugating Enzyme E2 N                                        | 1.99 |
| IRF3      | Interferon Regulatory Factor 3                                           | 1.99 |
| IRS1      | Insulin Receptor Substrate 1                                             | 1.99 |
| TAB2      | TGF-Beta Activated Kinase 1 (MAP3K7) Binding Protein 2                   | 1.99 |
| PTS       | 6-Pyruvoyltetrahydropterin Synthase                                      | 1.99 |
| STAT2     | Signal Transducer And Activator Of Transcription 2                       | 1.99 |
| NBN       | Nibrin                                                                   | 1.99 |
| MSX2      | Msh Homeobox 2                                                           | 1.99 |
| KCNJ1     | Potassium Inwardly Rectifying Channel Subfamily J Member 1               | 1.99 |
| KCNJ11    | Potassium Inwardly Rectifying Channel Subfamily J Member 11              | 1.99 |
| USP7      | Ubiquitin Specific Peptidase 7                                           | 1.99 |
| USP9X     | Ubiquitin Specific Peptidase 9 X-Linked                                  | 1.99 |
| F9        | Coagulation Factor IX                                                    | 1.99 |
| MASP1     | Mannan Binding Lectin Serine Peptidase 1                                 | 1.99 |
| LTA4H     | Leukotriene A4 Hydrolase                                                 | 1.99 |
| FKBP1A    | FKBP Prolyl Isomerase 1A                                                 | 1.99 |
| ACTN4     | Actinin Alpha 4                                                          | 1.99 |
| CD46      | CD46 Molecule                                                            | 1.99 |
| RIPK2     | Receptor Interacting Serine/Threonine Kinase 2                           | 1.99 |
| CFI       | Complement Factor I                                                      | 1.99 |
| DMD       | Dystrophin                                                               | 1.99 |
| ELANE     | Elastase, Neutrophil Expressed                                           | 1.99 |
| RPS6KA2   | Ribosomal Protein S6 Kinase A2                                           | 1.99 |
| TNFRSF13B | TNF Receptor Superfamily Member 13B                                      | 1.99 |
| L1CAM     | L1 Cell Adhesion Molecule                                                | 1.99 |
| LFNG      | LFNG O-Fucosylpeptide 3-Beta-N-Acetylglucosaminyltransferase             | 1.99 |
| TYRP1     | Tyrosinase Related Protein 1                                             | 1.99 |
| IRF7      | Interferon Regulatory Factor 7                                           | 1.99 |
| KDM6A     | Lysine Demethylase 6A                                                    | 1.99 |
| ITGA3     | Integrin Subunit Alpha 3                                                 | 1.99 |
| PSMA6     | Proteasome 20S Subunit Alpha 6                                           | 1.99 |
| DCTN1     | Dynactin Subunit 1                                                       | 1.99 |
| CDK7      | Cyclin Dependent Kinase 7                                                | 1.99 |
| AFP       | Alpha Fetoprotein                                                        | 1.99 |
| FGF17     | Fibroblast Growth Factor 17                                              | 1.99 |
| CAMK4     | Calcium/Calmodulin Dependent Protein Kinase IV                           | 1.99 |
| GJA8      | Gap Junction Protein Alpha 8                                             | 1.99 |
| CCR2      | C-C Motif Chemokine Receptor 2                                           | 1.99 |
| GOT2      | Glutamic-Oxaloacetic Transaminase 2                                      | 1.99 |

|           |                                                                    |      |
|-----------|--------------------------------------------------------------------|------|
| FANCL     | FA Complementation Group L                                         | 1.99 |
| MAP2K7    | Mitogen-Activated Protein Kinase Kinase 7                          | 1.99 |
| ATRX      | ATRX Chromatin Remodeler                                           | 1.99 |
| F2RL1     | F2R Like Trypsin Receptor 1                                        | 1.99 |
| ATP7A     | ATPase Copper Transporting Alpha                                   | 1.99 |
| BMP1      | Bone Morphogenetic Protein 1                                       | 1.99 |
| ACVR2A    | Activin A Receptor Type 2A                                         | 1.99 |
| ADCY7     | Adenylate Cyclase 7                                                | 1.99 |
| CYP2E1    | Cytochrome P450 Family 2 Subfamily E Member 1                      | 1.99 |
| CTNND1    | Catenin Delta 1                                                    | 1.99 |
| CTSC      | Cathepsin C                                                        | 1.99 |
| HPD       | 4-Hydroxyphenylpyruvate Dioxygenase                                | 1.99 |
| EXTL3     | Exostosin Like Glycosyltransferase 3                               | 1.99 |
| CFB       | Complement Factor B                                                | 1.99 |
| CFH       | Complement Factor H                                                | 1.99 |
| RPA1      | Replication Protein A1                                             | 1.99 |
| CD22      | CD22 Molecule                                                      | 1.99 |
| CDK1      | Cyclin Dependent Kinase 1                                          | 1.99 |
| MOG       | Myelin Oligodendrocyte Glycoprotein                                | 1.99 |
| COL5A1    | Collagen Type V Alpha 1 Chain                                      | 1.99 |
| NEFH      | Neurofilament Heavy                                                | 1.99 |
| NEK9      | NIMA Related Kinase 9                                              | 1.99 |
| HRH4      | Histamine Receptor H4                                              | 1.99 |
| SERPINH1  | Serpin Family H Member 1                                           | 1.99 |
| IFNAR1    | Interferon Alpha And Beta Receptor Subunit 1                       | 1.99 |
| PAFAH1B1  | Platelet Activating Factor Acetylhydrolase 1b Regulatory Subunit 1 | 1.99 |
| PPP1CB    | Protein Phosphatase 1 Catalytic Subunit Beta                       | 1.99 |
| PRODH     | Proline Dehydrogenase 1                                            | 1.99 |
| SOS2      | SOS Ras/Rho Guanine Nucleotide Exchange Factor 2                   | 1.99 |
| PRF1      | Perforin 1                                                         | 1.99 |
| SDC2      | Syndecan 2                                                         | 1.99 |
| PML       | PML Nuclear Body Scaffold                                          | 1.99 |
| SLC27A2   | Solute Carrier Family 27 Member 2                                  | 1.99 |
| SLC29A2   | Solute Carrier Family 29 Member 2                                  | 1.99 |
| OAS1      | 2'-5'-Oligoadenylate Synthetase 1                                  | 1.99 |
| TNFSF15   | TNF Superfamily Member 15                                          | 1.99 |
| LARS2     | Leucyl-TRNA Synthetase 2, Mitochondrial                            | 1.99 |
| TNFRSF11A | TNF Receptor Superfamily Member 11a                                | 1.99 |
| TXN       | Thioredoxin                                                        | 1.99 |
| UBE2A     | Ubiquitin Conjugating Enzyme E2 A                                  | 1.99 |
| UBE2B     | Ubiquitin Conjugating Enzyme E2 B                                  | 1.99 |

|         |                                                                  |      |
|---------|------------------------------------------------------------------|------|
| UBE2D1  | Ubiquitin Conjugating Enzyme E2 D1                               | 1.99 |
| RANBP2  | RAN Binding Protein 2                                            | 1.99 |
| TBX5    | T-Box Transcription Factor 5                                     | 1.99 |
| TEC     | Tec Protein Tyrosine Kinase                                      | 1.99 |
| STEAP3  | STEAP3 Metalloreductase                                          | 1.99 |
| TRPM6   | Transient Receptor Potential Cation Channel Subfamily M Member 6 | 1.99 |
| LAT     | Linker For Activation Of T Cells                                 | 1.99 |
| MYH6    | Myosin Heavy Chain 6                                             | 1.99 |
| MYO6    | Myosin VI                                                        | 1.99 |
| POLD1   | DNA Polymerase Delta 1, Catalytic Subunit                        | 1.99 |
| P2RX7   | Purinergic Receptor P2X 7                                        | 1.99 |
| ITCH    | Itchy E3 Ubiquitin Protein Ligase                                | 1.99 |
| TGFB1   | Transforming Growth Factor Beta Induced                          | 1.99 |
| TGIF1   | TGFB Induced Factor Homeobox 1                                   | 1.99 |
| VAPB    | VAMP Associated Protein B And C                                  | 1.99 |
| LMAN1   | Lectin, Mannose Binding 1                                        | 1.99 |
| ALAS1   | 5'-Aminolevulinate Synthase 1                                    | 1.99 |
| CARD9   | Caspase Recruitment Domain Family Member 9                       | 1.99 |
| CANX    | Calnexin                                                         | 1.99 |
| APTX    | Aprataxin                                                        | 1.99 |
| AOC3    | Amine Oxidase Copper Containing 3                                | 1.99 |
| ALS2    | Alsln Rho Guanine Nucleotide Exchange Factor ALS2                | 1.99 |
| AMPH    | Amphiphysin                                                      | 1.99 |
| MCOLN1  | Mucolipin 1                                                      | 1.99 |
| BMX     | BMX Non-Receptor Tyrosine Kinase                                 | 1.99 |
| BCKDHA  | Branched Chain Keto Acid Dehydrogenase E1 Subunit Alpha          | 1.99 |
| ACO1    | Aconitase 1                                                      | 1.99 |
| ADH4    | Alcohol Dehydrogenase 4 (Class II), Pi Polypeptide               | 1.99 |
| GADD45A | Growth Arrest And DNA Damage Inducible Alpha                     | 1.99 |
| FMR1    | FMRP Translational Regulator 1                                   | 1.99 |
| FUT2    | Fucosyltransferase 2                                             | 1.99 |
| MAD2L2  | Mitotic Arrest Deficient 2 Like 2                                | 1.99 |
| APOA2   | Apolipoprotein A2                                                | 1.99 |
| RHAG    | Rh Associated Glycoprotein                                       | 1.99 |
| CISH    | Cytokine Inducible SH2 Containing Protein                        | 1.99 |
| CLCN1   | Chloride Voltage-Gated Channel 1                                 | 1.99 |
| CLCNKB  | Chloride Voltage-Gated Channel Kb                                | 1.99 |
| HDC     | Histidine Decarboxylase                                          | 1.99 |
| CFD     | Complement Factor D                                              | 1.99 |
| DNAJB1  | DnaJ Heat Shock Protein Family (Hsp40) Member B1                 | 1.99 |

|          |                                                                   |      |
|----------|-------------------------------------------------------------------|------|
| RPL15    | Ribosomal Protein L15                                             | 1.99 |
| MYL3     | Myosin Light Chain 3                                              | 1.99 |
| RPA2     | Replication Protein A2                                            | 1.99 |
| GPNMB    | Glycoprotein Nmb                                                  | 1.99 |
| EHHADH   | Enoyl-CoA Hydratase And 3-Hydroxyacyl CoA Dehydrogenase           | 1.99 |
| SFTPD    | Surfactant Protein D                                              | 1.99 |
| SGSH     | N-Sulfoglucosamine Sulfohydrolase                                 | 1.99 |
| PADI4    | Peptidyl Arginine Deiminase 4                                     | 1.99 |
| SP1      | Sp1 Transcription Factor                                          | 1.99 |
| SDHD     | Succinate Dehydrogenase Complex Subunit D                         | 1.99 |
| RPL35A   | Ribosomal Protein L35a                                            | 1.99 |
| NFATC4   | Nuclear Factor Of Activated T Cells 4                             | 1.99 |
| NKX2-5   | NK2 Homeobox 5                                                    | 1.99 |
| RPS10    | Ribosomal Protein S10                                             | 1.99 |
| RPS14    | Ribosomal Protein S14                                             | 1.99 |
| SLC6A6   | Solute Carrier Family 6 Member 6                                  | 1.99 |
| OCLN     | Occludin                                                          | 1.99 |
| SLC46A1  | Solute Carrier Family 46 Member 1                                 | 1.99 |
| OGT      | O-Linked N-Acetylglucosamine (GlcNAc) Transferase                 | 1.99 |
| OPTN     | Optineurin                                                        | 1.99 |
| NTHL1    | Nth Like DNA Glycosylase 1                                        | 1.99 |
| NPPB     | Natriuretic Peptide B                                             | 1.99 |
| NR1I3    | Nuclear Receptor Subfamily 1 Group I Member 3                     | 1.99 |
| PTPRN    | Protein Tyrosine Phosphatase Receptor Type N                      | 1.99 |
| TOR1A    | Torsin Family 1 Member A                                          | 1.99 |
| TNFRSF17 | TNF Receptor Superfamily Member 17                                | 1.99 |
| TDG      | Thymine DNA Glycosylase                                           | 1.99 |
| TMPRSS6  | Transmembrane Serine Protease 6                                   | 1.99 |
| TRIM33   | Tripartite Motif Containing 33                                    | 1.99 |
| LGALS3   | Galectin 3                                                        | 1.99 |
| LIG3     | DNA Ligase 3                                                      | 1.99 |
| PVR      | PVR Cell Adhesion Molecule                                        | 1.99 |
| KCNN3    | Potassium Calcium-Activated Channel Subfamily N Member 3          | 1.99 |
| RBBP8    | RB Binding Protein 8, Endonuclease                                | 1.99 |
| REV3L    | REV3 Like, DNA Directed Polymerase Zeta Catalytic Subunit         | 1.99 |
| TAZ      | Tafazzin                                                          | 1.99 |
| TLE1     | TLE Family Member 1, Transcriptional Corepressor                  | 1.99 |
| PSMD4    | Proteasome 26S Subunit, Non-ATPase 4                              | 1.99 |
| PRKAR2B  | Protein Kinase CAMP-Dependent Type II Regulatory Subunit Beta     | 1.99 |
| HUWE1    | HECT, UBA And WWE Domain Containing E3 Ubiquitin Protein Ligase 1 | 1.99 |

|         |                                                                         |      |
|---------|-------------------------------------------------------------------------|------|
| PDE6D   | Phosphodiesterase 6D                                                    | 1.99 |
| PDE4A   | Phosphodiesterase 4A                                                    | 1.99 |
| RPE65   | Retinoid Isomerohydrolase RPE65                                         | 1.99 |
| MYO9B   | Myosin IXB                                                              | 1.99 |
| CYP51A1 | Cytochrome P450 Family 51 Subfamily A Member 1                          | 1.99 |
| PON3    | Paraoxonase 3                                                           | 1.99 |
| THY1    | Thy-1 Cell Surface Antigen                                              | 1.99 |
| USP1    | Ubiquitin Specific Peptidase 1                                          | 1.99 |
| FXYP2   | FXYP Domain Containing Ion Transport Regulator 2                        | 1.99 |
| GHRL    | Ghrelin And Obestatin Prepropeptide                                     | 1.99 |
| CCL20   | C-C Motif Chemokine Ligand 20                                           | 1.99 |
| CCL21   | C-C Motif Chemokine Ligand 21                                           | 1.99 |
| GJA4    | Gap Junction Protein Alpha 4                                            | 1.99 |
| GMPR    | Guanosine Monophosphate Reductase                                       | 1.99 |
| FABP2   | Fatty Acid Binding Protein 2                                            | 1.99 |
| MAPKAP1 | MAPK Associated Protein 1                                               | 1.99 |
| FIG4    | FIG4 Phosphoinositide 5-Phosphatase                                     | 1.99 |
| MAFB    | MAF BZIP Transcription Factor B                                         | 1.99 |
| FAR1    | Fatty Acyl-CoA Reductase 1                                              | 1.99 |
| ATG16L1 | Autophagy Related 16 Like 1                                             | 1.99 |
| LTF     | Lactotransferrin                                                        | 1.99 |
| LZTR1   | Leucine Zipper Like Transcription Regulator 1                           | 1.99 |
| FANCG   | FA Complementation Group G                                              | 1.99 |
| AMD1    | Adenosylmethionine Decarboxylase 1                                      | 1.99 |
| AMH     | Anti-Mullerian Hormone                                                  | 1.99 |
| AIMP1   | Aminoacyl TRNA Synthetase Complex Interacting Multifunctional Protein 1 | 1.99 |
| ACD     | ACD Shelterin Complex Subunit And Telomerase Recruitment Factor         | 1.99 |
| ABCD4   | ATP Binding Cassette Subfamily D Member 4                               | 1.99 |
| ADH1B   | Alcohol Dehydrogenase 1B (Class I), Beta Polypeptide                    | 1.99 |
| ACAA1   | Acetyl-CoA Acyltransferase 1                                            | 1.99 |
| C5AR1   | Complement C5a Receptor 1                                               | 1.99 |
| FOXP2   | Forkhead Box P2                                                         | 1.99 |
| APBB1   | Amyloid Beta Precursor Protein Binding Family B Member 1                | 1.99 |
| FCER1A  | Fc Fragment Of IgE Receptor Ia                                          | 1.99 |
| CXADR   | CXADR Ig-Like Cell Adhesion Molecule                                    | 1.99 |
| CXCR1   | C-X-C Motif Chemokine Receptor 1                                        | 1.99 |
| CRBN    | Cereblon                                                                | 1.99 |
| GAP43   | Growth Associated Protein 43                                            | 1.99 |
| CDKL5   | Cyclin Dependent Kinase Like 5                                          | 1.99 |
| GTF2H1  | General Transcription Factor IIH Subunit 1                              | 1.99 |

|          |                                                                |      |
|----------|----------------------------------------------------------------|------|
| HEY1     | Hes Related Family BHLH Transcription Factor With YRPW Motif 1 | 1.99 |
| COL11A1  | Collagen Type XI Alpha 1 Chain                                 | 1.99 |
| DPP6     | Dipeptidyl Peptidase Like 6                                    | 1.99 |
| DYSF     | Dysferlin                                                      | 1.99 |
| E2F1     | E2F Transcription Factor 1                                     | 1.99 |
| CD209    | CD209 Molecule                                                 | 1.99 |
| CD244    | CD244 Molecule                                                 | 1.99 |
| DDX11    | DEAD/H-Box Helicase 11                                         | 1.99 |
| DDX41    | DEAD-Box Helicase 41                                           | 1.99 |
| CYSLTR1  | Cysteinyl Leukotriene Receptor 1                               | 1.99 |
| EIF4A3   | Eukaryotic Translation Initiation Factor 4A3                   | 1.99 |
| RPL26    | Ribosomal Protein L26                                          | 1.99 |
| CPN1     | Carboxypeptidase N Subunit 1                                   | 1.99 |
| PRSS3    | Serine Protease 3                                              | 1.99 |
| PRPF3    | Pre-mRNA Processing Factor 3                                   | 1.99 |
| NOP56    | NOP56 Ribonucleoprotein                                        | 1.99 |
| NPHP1    | Nephrocystin 1                                                 | 1.99 |
| PANK2    | Pantothenate Kinase 2                                          | 1.99 |
| PPOX     | Protoporphyrinogen Oxidase                                     | 1.99 |
| IGFBP1   | Insulin Like Growth Factor Binding Protein 1                   | 1.99 |
| SOX17    | SRY-Box Transcription Factor 17                                | 1.99 |
| SDC1     | Syndecan 1                                                     | 1.99 |
| RRAS     | RAS Related                                                    | 1.99 |
| RPS6KA6  | Ribosomal Protein S6 Kinase A6                                 | 1.99 |
| SBDS     | SBDS Ribosome Maturation Factor                                | 1.99 |
| RPS24    | Ribosomal Protein S24                                          | 1.99 |
| NMT1     | N-Myristoyltransferase 1                                       | 1.99 |
| POLR3A   | RNA Polymerase III Subunit A                                   | 1.99 |
| SLC33A1  | Solute Carrier Family 33 Member 1                              | 1.99 |
| SEPSECS  | Sep (O-Phosphoserine) tRNA:Sec (Selenocysteine) tRNA Synthase  | 1.99 |
| TNFRSF4  | TNF Receptor Superfamily Member 4                              | 1.99 |
| TNFRSF6B | TNF Receptor Superfamily Member 6b                             | 1.99 |
| TRADD    | TNFRSF1A Associated Via Death Domain                           | 1.99 |
| LAP3     | Leucine Aminopeptidase 3                                       | 1.99 |
| LGALS1   | Galectin 1                                                     | 1.99 |
| TRIM24   | Tripartite Motif Containing 24                                 | 1.99 |
| UBE2V2   | Ubiquitin Conjugating Enzyme E2 V2                             | 1.99 |
| UQCRB    | Ubiquinol-Cytochrome C Reductase Binding Protein               | 1.99 |
| SYP      | Synaptophysin                                                  | 1.99 |
| KCNN2    | Potassium Calcium-Activated Channel Subfamily N Member 2       | 1.99 |



|          |                                                                                 |      |
|----------|---------------------------------------------------------------------------------|------|
| TAPBP    | TAP Binding Protein                                                             | 1.99 |
| JAM3     | Junctional Adhesion Molecule 3                                                  | 1.99 |
| TJP1     | Tight Junction Protein 1                                                        | 1.99 |
| SRR      | Serine Racemase                                                                 | 1.99 |
| IREB2    | Iron Responsive Element Binding Protein 2                                       | 1.99 |
| SAMHD1   | SAM And HD Domain Containing Deoxynucleoside Triphosphate Triphosphohydrolase 1 | 1.99 |
| MSH3     | MutS Homolog 3                                                                  | 1.99 |
| POLL     | DNA Polymerase Lambda                                                           | 1.99 |
| PPBP     | Pro-Platelet Basic Protein                                                      | 1.99 |
| POT1     | Protection Of Telomeres 1                                                       | 1.99 |
| ID1      | Inhibitor Of DNA Binding 1, HLH Protein                                         | 1.99 |
| KREMEN1  | Kringle Containing Transmembrane Protein 1                                      | 1.99 |
| KRT13    | Keratin 13                                                                      | 1.99 |
| UBC      | Ubiquitin C                                                                     | 1.99 |
| MAN2A1   | Mannosidase Alpha Class 2A Member 1                                             | 1.99 |
| LPIN2    | Lipin 2                                                                         | 1.99 |
| ARFGAP1  | ADP Ribosylation Factor GTPase Activating Protein 1                             | 1.99 |
| BCL11B   | BAF Chromatin Remodeling Complex Subunit BCL11B                                 | 1.99 |
| ADH1A    | Alcohol Dehydrogenase 1A (Class I), Alpha Polypeptide                           | 1.99 |
| ATXN10   | Ataxin 10                                                                       | 1.99 |
| CTSE     | Cathepsin E                                                                     | 1.99 |
| HBA1     | Hemoglobin Subunit Alpha 1                                                      | 1.99 |
| CETN2    | Centrin 2                                                                       | 1.99 |
| DNTT     | DNA Nucleotidylexotransferase                                                   | 1.99 |
| NEDD9    | Neural Precursor Cell Expressed, Developmentally Down-Regulated 9               | 1.99 |
| PFAS     | Phosphoribosylformylglycinamide Synthase                                        | 1.99 |
| PRPF31   | Pre-mRNA Processing Factor 31                                                   | 1.99 |
| PRPF4    | Pre-mRNA Processing Factor 4                                                    | 1.99 |
| SECISBP2 | SECIS Binding Protein 2                                                         | 1.99 |
| IFI16    | Interferon Gamma Inducible Protein 16                                           | 1.99 |
| PROCR    | Protein C Receptor                                                              | 1.99 |
| SAA1     | Serum Amyloid A1                                                                | 1.99 |
| RPS17    | Ribosomal Protein S17                                                           | 1.99 |
| SLC30A10 | Solute Carrier Family 30 Member 10                                              | 1.99 |
| SLC30A8  | Solute Carrier Family 30 Member 8                                               | 1.99 |
| SLC35A3  | Solute Carrier Family 35 Member A3                                              | 1.99 |
| SPRY1    | Sprouty RTK Signaling Antagonist 1                                              | 1.99 |
| PIGK     | Phosphatidylinositol Glycan Anchor Biosynthesis Class K                         | 1.99 |
| TRAF5    | TNF Receptor Associated Factor 5                                                | 1.99 |
| TRH      | Thyrotropin Releasing Hormone                                                   | 1.99 |

|         |                                                                         |      |
|---------|-------------------------------------------------------------------------|------|
| RARS2   | Arginyl-TRNA Synthetase 2, Mitochondrial                                | 1.99 |
| TCOF1   | Treacle Ribosome Biogenesis Factor 1                                    | 1.99 |
| TERF2IP | TERF2 Interacting Protein                                               | 1.99 |
| RAD23A  | RAD23 Homolog A, Nucleotide Excision Repair Protein                     | 1.99 |
| PYY     | Peptide YY                                                              | 1.99 |
| PROX1   | Prospero Homeobox 1                                                     | 1.99 |
| S100A8  | S100 Calcium Binding Protein A8                                         | 1.99 |
| NAGS    | N-Acetylglutamate Synthase                                              | 1.99 |
| SNAP29  | Synaptosome Associated Protein 29                                       | 1.99 |
| PON2    | Paraoxonase 2                                                           | 1.99 |
| RAD17   | RAD17 Checkpoint Clamp Loader Component                                 | 1.99 |
| STX16   | Syntaxin 16                                                             | 1.99 |
| JAG2    | Jagged Canonical Notch Ligand 2                                         | 1.99 |
| SPRED1  | Sprouty Related EVH1 Domain Containing 1                                | 1.99 |
| ZIC2    | Zic Family Member 2                                                     | 1.99 |
| WWC1    | WW And C2 Domain Containing 1                                           | 1.99 |
| LMO2    | LIM Domain Only 2                                                       | 1.99 |
| BBS2    | Bardet-Biedl Syndrome 2                                                 | 1.99 |
| BBS4    | Bardet-Biedl Syndrome 4                                                 | 1.99 |
| GDF15   | Growth Differentiation Factor 15                                        | 1.99 |
| GCG     | Glucagon                                                                | 1.99 |
| GCM2    | Glial Cells Missing Transcription Factor 2                              | 1.99 |
| CCL7    | C-C Motif Chemokine Ligand 7                                            | 1.99 |
| CCL19   | C-C Motif Chemokine Ligand 19                                           | 1.99 |
| CCT3    | Chaperonin Containing TCP1 Subunit 3                                    | 1.99 |
| GNA15   | G Protein Subunit Alpha 15                                              | 1.99 |
| LTK     | Leukocyte Receptor Tyrosine Kinase                                      | 1.99 |
| ATRIP   | ATR Interacting Protein                                                 | 1.99 |
| LRBA    | LPS Responsive Beige-Like Anchor Protein                                | 1.99 |
| F2RL2   | Coagulation Factor II Thrombin Receptor Like 2                          | 1.99 |
| APCS    | Amyloid P Component, Serum                                              | 1.99 |
| AP2S1   | Adaptor Related Protein Complex 2 Subunit Sigma 1                       | 1.99 |
| LPA     | Lipoprotein(A)                                                          | 1.99 |
| FBN2    | Fibrillin 2                                                             | 1.99 |
| AIM2    | Absent In Melanoma 2                                                    | 1.99 |
| AIMP2   | Aminoacyl TRNA Synthetase Complex Interacting Multifunctional Protein 2 | 1.99 |
| BMP15   | Bone Morphogenetic Protein 15                                           | 1.99 |
| BCAP31  | B Cell Receptor Associated Protein 31                                   | 1.99 |
| MFNG    | MFNG O-Fucosylpeptide 3-Beta-N-Acetylglucosaminyltransferase            | 1.99 |
| CRYBB3  | Crystallin Beta B3                                                      | 1.99 |

|          |                                                     |      |
|----------|-----------------------------------------------------|------|
| EPX      | Eosinophil Peroxidase                               | 1.99 |
| CEP57    | Centrosomal Protein 57                              | 1.99 |
| CELF2    | CUGBP Elav-Like Family Member 2                     | 1.99 |
| HNRNPC   | Heterogeneous Nuclear Ribonucleoprotein C           | 1.99 |
| RHBDF2   | Rhomoid 5 Homolog 2                                 | 1.99 |
| CNBP     | CCHC-Type Zinc Finger Nucleic Acid Binding Protein  | 1.99 |
| CLTB     | Clathrin Light Chain B                              | 1.99 |
| CLDN16   | Claudin 16                                          | 1.99 |
| RFX5     | Regulatory Factor X5                                | 1.99 |
| MLC1     | Modulator Of VRAC Current 1                         | 1.99 |
| CFHR1    | Complement Factor H Related 1                       | 1.99 |
| MS4A2    | Membrane Spanning 4-Domains A2                      | 1.99 |
| DLG3     | Discs Large MAGUK Scaffold Protein 3                | 1.99 |
| DDB1     | Damage Specific DNA Binding Protein 1               | 1.99 |
| MPZL1    | Myelin Protein Zero Like 1                          | 1.99 |
| MR1      | Major Histocompatibility Complex, Class I-Related   | 1.99 |
| MRE11    | MRE11 Homolog, Double Strand Break Repair Nuclease  | 1.99 |
| RNF8     | Ring Finger Protein 8                               | 1.99 |
| RPL34    | Ribosomal Protein L34                               | 1.99 |
| CREM     | CAMP Responsive Element Modulator                   | 1.99 |
| HLA-DMB  | Major Histocompatibility Complex, Class II, DM Beta | 1.99 |
| IL17RB   | Interleukin 17 Receptor B                           | 1.99 |
| PER1     | Period Circadian Regulator 1                        | 1.99 |
| PRPF6    | Pre-mRNA Processing Factor 6                        | 1.99 |
| IL1RL1   | Interleukin 1 Receptor Like 1                       | 1.99 |
| IL1RL2   | Interleukin 1 Receptor Like 2                       | 1.99 |
| SETX     | Senataxin                                           | 1.99 |
| PAPPA    | Pappalysin 1                                        | 1.99 |
| IARS2    | Isoleucyl-tRNA Synthetase 2, Mitochondrial          | 1.99 |
| ICAM3    | Intercellular Adhesion Molecule 3                   | 1.99 |
| PPIG     | Peptidylprolyl Isomerase G                          | 1.99 |
| PANK1    | Pantothenate Kinase 1                               | 1.99 |
| PCNT     | Pericentrin                                         | 1.99 |
| SNRNP200 | Small Nuclear Ribonucleoprotein U5 Subunit 200      | 1.99 |
| NFKBIB   | NFkB Inhibitor Beta                                 | 1.99 |
| RPLP0    | Ribosomal Protein Lateral Stalk Subunit P0          | 1.99 |
| RPL7     | Ribosomal Protein L7                                | 1.99 |
| POLR2L   | RNA Polymerase II, I And III Subunit L              | 1.99 |
| PLOD1    | Procollagen-Lysine,2-Oxoglutarate 5-Dioxygenase 1   | 1.99 |
| SLC4A5   | Solute Carrier Family 4 Member 5                    | 1.99 |
| SLAMF7   | SLAM Family Member 7                                | 1.99 |

|         |                                                     |      |
|---------|-----------------------------------------------------|------|
| RPS3A   | Ribosomal Protein S3A                               | 1.99 |
| SRM     | Spermidine Synthase                                 | 1.99 |
| TOPBP1  | DNA Topoisomerase II Binding Protein 1              | 1.99 |
| LGALS8  | Galectin 8                                          | 1.99 |
| TREM1   | Triggering Receptor Expressed On Myeloid Cells 1    | 1.99 |
| PUS1    | Pseudouridine Synthase 1                            | 1.99 |
| JPH3    | Junctophilin 3                                      | 1.99 |
| RASGRP3 | RAS Guanyl Releasing Protein 3                      | 1.99 |
| KLRD1   | Killer Cell Lectin Like Receptor D1                 | 1.99 |
| REV1    | REV1 DNA Directed Polymerase                        | 1.99 |
| RAD18   | RAD18 E3 Ubiquitin Protein Ligase                   | 1.99 |
| PCSK5   | Proprotein Convertase Subtilisin/Kexin Type 5       | 1.99 |
| HUS1    | HUS1 Checkpoint Clamp Component                     | 1.99 |
| PRPF8   | Pre-mRNA Processing Factor 8                        | 1.99 |
| LDB3    | LIM Domain Binding 3                                | 1.99 |
| MUC5B   | Mucin 5B, Oligomeric Mucus/Gel-Forming              | 1.99 |
| RPA3    | Replication Protein A3                              | 1.99 |
| CLDN2   | Claudin 2                                           | 1.99 |
| RPS29   | Ribosomal Protein S29                               | 1.99 |
| CUL4A   | Cullin 4A                                           | 1.99 |
| DLL3    | Delta Like Canonical Notch Ligand 3                 | 1.99 |
| POLK    | DNA Polymerase Kappa                                | 1.99 |
| ID3     | Inhibitor Of DNA Binding 3, HLH Protein             | 1.99 |
| KIF3A   | Kinesin Family Member 3A                            | 1.99 |
| CARD10  | Caspase Recruitment Domain Family Member 10         | 1.99 |
| CADM3   | Cell Adhesion Molecule 3                            | 1.99 |
| CALB2   | Calbindin 2                                         | 1.99 |
| GOLGA2  | Golgin A2                                           | 1.99 |
| GORASP1 | Golgi Reassembly Stacking Protein 1                 | 1.99 |
| GORASP2 | Golgi Reassembly Stacking Protein 2                 | 1.99 |
| CCR9    | C-C Motif Chemokine Receptor 9                      | 1.99 |
| GP5     | Glycoprotein V Platelet                             | 1.99 |
| BACH2   | BTB Domain And CNC Homolog 2                        | 1.99 |
| BBS10   | Bardet-Biedl Syndrome 10                            | 1.99 |
| ARFGAP3 | ADP Ribosylation Factor GTPase Activating Protein 3 | 1.99 |
| FCGRT   | Fc Fragment Of IgG Receptor And Transporter         | 1.99 |
| LSR     | Lipolysis Stimulated Lipoprotein Receptor           | 1.99 |
| LRRC4C  | Leucine Rich Repeat Containing 4C                   | 1.99 |
| MAVS    | Mitochondrial Antiviral Signaling Protein           | 1.99 |
| MAZ     | MYC Associated Zinc Finger Protein                  | 1.99 |
| MBD1    | Methyl-CpG Binding Domain Protein 1                 | 1.99 |

|         |                                                      |      |
|---------|------------------------------------------------------|------|
| ACSBG1  | Acyl-CoA Synthetase Bubblegum Family Member 1        | 1.99 |
| BSND    | Barttin CLCNK Type Accessory Subunit Beta            | 1.99 |
| FLT3LG  | Fms Related Receptor Tyrosine Kinase 3 Ligand        | 1.99 |
| CXCL16  | C-X-C Motif Chemokine Ligand 16                      | 1.99 |
| CXCL5   | C-X-C Motif Chemokine Ligand 5                       | 1.99 |
| RNASE3  | Ribonuclease A Family Member 3                       | 1.99 |
| CRYBA1  | Crystallin Beta A1                                   | 1.99 |
| CRYBB2  | Crystallin Beta B2                                   | 1.99 |
| CD68    | CD68 Molecule                                        | 1.99 |
| CEP164  | Centrosomal Protein 164                              | 1.99 |
| RHCE    | Rh Blood Group CcEe Antigens                         | 1.99 |
| CLPS    | Colipase                                             | 1.99 |
| CLSPN   | Claspin                                              | 1.99 |
| COIL    | Coilin                                               | 1.99 |
| CFHR5   | Complement Factor H Related 5                        | 1.99 |
| CIAO1   | Cytosolic Iron-Sulfur Assembly Component 1           | 1.99 |
| DEPDC5  | DEP Domain Containing 5, GATOR1 Subcomplex Subunit   | 1.99 |
| DTX1    | Deltex E3 Ubiquitin Ligase 1                         | 1.99 |
| RPGR    | Retinitis Pigmentosa GTPase Regulator                | 1.99 |
| NALCN   | Sodium Leak Channel, Non-Selective                   | 1.99 |
| EEF1E1  | Eukaryotic Translation Elongation Factor 1 Epsilon 1 | 1.99 |
| GPR83   | G Protein-Coupled Receptor 83                        | 1.99 |
| CD276   | CD276 Molecule                                       | 1.99 |
| GAST    | Gastrin                                              | 1.99 |
| COL27A1 | Collagen Type XXVII Alpha 1 Chain                    | 1.99 |
| CXCR6   | C-X-C Motif Chemokine Receptor 6                     | 1.99 |
| NEO1    | Neogenin 1                                           | 1.99 |
| HPR     | Haptoglobin-Related Protein                          | 1.99 |
| CD72    | CD72 Molecule                                        | 1.99 |
| HLA-DMA | Major Histocompatibility Complex, Class II, DM Alpha | 1.99 |
| HLA-DOA | Major Histocompatibility Complex, Class II, DO Alpha | 1.99 |
| HLA-DOB | Major Histocompatibility Complex, Class II, DO Beta  | 1.99 |
| PEX11B  | Peroxisomal Biogenesis Factor 11 Beta                | 1.99 |
| SIM1    | SIM BHLH Transcription Factor 1                      | 1.99 |
| SERINC1 | Serine Incorporator 1                                | 1.99 |
| SH3BP5  | SH3 Domain Binding Protein 5                         | 1.99 |
| PPL     | Periplakin                                           | 1.99 |
| PRG2    | Proteoglycan 2, Pro Eosinophil Major Basic Protein   | 1.99 |
| SCGB1A1 | Secretoglobin Family 1A Member 1                     | 1.99 |
| RS1     | Retinoschisin 1                                      | 1.99 |
| NFYB    | Nuclear Transcription Factor Y Subunit Beta          | 1.99 |

|          |                                                                             |      |
|----------|-----------------------------------------------------------------------------|------|
| NME8     | NME/NM23 Family Member 8                                                    | 1.99 |
| SMCHD1   | Structural Maintenance Of Chromosomes Flexible Hinge Domain<br>Containing 1 | 1.99 |
| PLEK     | Pleckstrin                                                                  | 1.99 |
| SLAMF1   | Signaling Lymphocytic Activation Molecule Family Member 1                   | 1.99 |
| SEN3     | SUMO Specific Peptidase 3                                                   | 1.99 |
| SRP72    | Signal Recognition Particle 72                                              | 1.99 |
| SSRP1    | Structure Specific Recognition Protein 1                                    | 1.99 |
| TMSB4X   | Thymosin Beta 4 X-Linked                                                    | 1.99 |
| TNFSF12  | TNF Superfamily Member 12                                                   | 1.99 |
| TCTN3    | Tectonic Family Member 3                                                    | 1.99 |
| PUS7     | Pseudouridine Synthase 7                                                    | 1.99 |
| KLRC1    | Killer Cell Lectin Like Receptor C1                                         | 1.99 |
| TBPL1    | TATA-Box Binding Protein Like 1                                             | 1.99 |
| STX5     | Syntaxin 5                                                                  | 1.99 |
| RAD9A    | RAD9 Checkpoint Clamp Component A                                           | 1.99 |
| HLA-DRB5 | Major Histocompatibility Complex, Class II, DR Beta 5                       | 1.99 |
| S100A7   | S100 Calcium Binding Protein A7                                             | 1.99 |
| POLD2    | DNA Polymerase Delta 2, Accessory Subunit                                   | 1.99 |
| POLD3    | DNA Polymerase Delta 3, Accessory Subunit                                   | 1.99 |
| POLQ     | DNA Polymerase Theta                                                        | 1.99 |
| IAPP     | Islet Amyloid Polypeptide                                                   | 1.99 |
| IFT88    | Intraflagellar Transport 88                                                 | 1.99 |
| TFCP2    | Transcription Factor CP2                                                    | 1.99 |
| UNC13A   | Unc-13 Homolog A                                                            | 1.99 |
| BMPER    | BMP Binding Endothelial Regulator                                           | 1.99 |
| BBS5     | Bardet-Biedl Syndrome 5                                                     | 1.99 |
| CCN2     | Cellular Communication Network Factor 2                                     | 1.99 |
| GJC3     | Gap Junction Protein Gamma 3                                                | 1.99 |
| CC2D2A   | Coiled-Coil And C2 Domain Containing 2A                                     | 1.99 |
| GOSR1    | Golgi SNAP Receptor Complex Member 1                                        | 1.99 |
| EXOSC10  | Exosome Component 10                                                        | 1.99 |
| ARMC9    | Armadillo Repeat Containing 9                                               | 1.99 |
| ARHGAP32 | Rho GTPase Activating Protein 32                                            | 1.99 |
| MAGEA4   | MAGE Family Member A4                                                       | 1.99 |
| ANKRD26  | Ankyrin Repeat Domain 26                                                    | 1.99 |
| AGO2     | Argonaute RISC Catalytic Component 2                                        | 1.99 |
| MATN1    | Matrilin 1                                                                  | 1.99 |
| A2ML1    | Alpha-2-Macroglobulin Like 1                                                | 1.99 |
| AANAT    | Aralkylamine N-Acetyltransferase                                            | 1.99 |
| AP1S1    | Adaptor Related Protein Complex 1 Subunit Sigma 1                           | 1.99 |

|          |                                                  |      |
|----------|--------------------------------------------------|------|
| HPX      | Hemopexin                                        | 1.99 |
| CRLF2    | Cytokine Receptor Like Factor 2                  | 1.99 |
| BTLA     | B And T Lymphocyte Associated                    | 1.99 |
| GTF2H3   | General Transcription Factor IIH Subunit 3       | 1.99 |
| CELSR3   | Cadherin EGF LAG Seven-Pass G-Type Receptor 3    | 1.99 |
| RHOD     | Ras Homolog Family Member D                      | 1.99 |
| HLTF     | Helicase Like Transcription Factor               | 1.99 |
| HNRNPDL  | Heterogeneous Nuclear Ribonucleoprotein D Like   | 1.99 |
| HBS1L    | HBS1 Like Translational GTPase                   | 1.99 |
| MLLT1    | MLLT1 Super Elongation Complex Subunit           | 1.99 |
| DERA     | Deoxyribose-Phosphate Aldolase                   | 1.99 |
| DHRS2    | Dehydrogenase/Reductase 2                        | 1.99 |
| MYOM2    | Myomesin 2                                       | 1.99 |
| CD83     | CD83 Molecule                                    | 1.99 |
| DEFB1    | Defensin Beta 1                                  | 1.99 |
| NDRG4    | NDRG Family Member 4                             | 1.99 |
| NEIL1    | Nei Like DNA Glycosylase 1                       | 1.99 |
| ELP3     | Elongator Acetyltransferase Complex Subunit 3    | 1.99 |
| CRELD1   | Cysteine Rich With EGF Like Domains 1            | 1.99 |
| SPG11    | SPG11 Vesicle Trafficking Associated, Spatacsin  | 1.99 |
| IL17RE   | Interleukin 17 Receptor E                        | 1.99 |
| IL18RAP  | Interleukin 18 Receptor Accessory Protein        | 1.99 |
| SPN      | Sialophorin                                      | 1.99 |
| SERPINA7 | Serpin Family A Member 7                         | 1.99 |
| SIX5     | SIX Homeobox 5                                   | 1.99 |
| NPHP3    | Nephrocystin 3                                   | 1.99 |
| PPP1R3C  | Protein Phosphatase 1 Regulatory Subunit 3C      | 1.99 |
| PIP5K2   | Diphosphoinositol Pentakisphosphate Kinase 2     | 1.99 |
| SAA4     | Serum Amyloid A4, Constitutive                   | 1.99 |
| SCARA5   | Scavenger Receptor Class A Member 5              | 1.99 |
| NFRKB    | Nuclear Factor Related To KappaB Binding Protein | 1.99 |
| ENAM     | Enamelin                                         | 1.99 |
| NLRC5    | NLR Family CARD Domain Containing 5              | 1.99 |
| NIT2     | Nitrilase Family Member 2                        | 1.99 |
| PKN3     | Protein Kinase N3                                | 1.99 |
| SLC25A37 | Solute Carrier Family 25 Member 37               | 1.99 |
| SLC38A3  | Solute Carrier Family 38 Member 3                | 1.99 |
| NT5C1A   | 5'-Nucleotidase, Cytosolic IA                    | 1.99 |
| RPS4X    | Ribosomal Protein S4 X-Linked                    | 1.99 |
| SHOX2    | Short Stature Homeobox 2                         | 1.99 |
| SHPRH    | SNF2 Histone Linker PHD RING Helicase            | 1.99 |

|          |                                                                   |      |
|----------|-------------------------------------------------------------------|------|
| PHIP     | Pleckstrin Homology Domain Interacting Protein                    | 1.99 |
| TNFRSF19 | TNF Receptor Superfamily Member 19                                | 1.99 |
| UBASH3A  | Ubiquitin Associated And SH3 Domain Containing A                  | 1.99 |
| LILRA2   | Leukocyte Immunoglobulin Like Receptor A2                         | 1.99 |
| UBR2     | Ubiquitin Protein Ligase E3 Component N-Recognin 2                | 1.99 |
| KCNN1    | Potassium Calcium-Activated Channel Subfamily N Member 1          | 1.99 |
| TEX14    | Testis Expressed 14, Intercellular Bridge Forming Factor          | 1.99 |
| TECTA    | Tectorin Alpha                                                    | 1.99 |
| DLX2     | Distal-Less Homeobox 2                                            | 1.99 |
| DLX6     | Distal-Less Homeobox 6                                            | 1.99 |
| POLM     | DNA Polymerase Mu                                                 | 1.99 |
| TGM6     | Transglutaminase 6                                                | 1.99 |
| KRT9     | Keratin 9                                                         | 1.99 |
| YBX2     | Y-Box Binding Protein 2                                           | 1.99 |
| BBS7     | Bardet-Biedl Syndrome 7                                           | 1.99 |
| CCL1     | C-C Motif Chemokine Ligand 1                                      | 1.99 |
| CCL13    | C-C Motif Chemokine Ligand 13                                     | 1.99 |
| ATCAY    | ATCAY Kinesin Light Chain Interacting Caytaxin                    | 1.99 |
| BBS1     | Bardet-Biedl Syndrome 1                                           | 1.99 |
| FIP1L1   | Factor Interacting With PAPOLA And CPSF1                          | 1.99 |
| EXPH5    | Exophilin 5                                                       | 1.99 |
| LRRC7    | Leucine Rich Repeat Containing 7                                  | 1.99 |
| GTPBP1   | GTP Binding Protein 1                                             | 1.99 |
| CEBPD    | CCAAT Enhancer Binding Protein Delta                              | 1.99 |
| HEY2     | Hes Related Family BHLH Transcription Factor With YRPW Motif<br>2 | 1.99 |
| RGS1     | Regulator Of G Protein Signaling 1                                | 1.99 |
| DYNC2H1  | Dynein Cytoplasmic 2 Heavy Chain 1                                | 1.99 |
| IL25     | Interleukin 25                                                    | 1.99 |
| NOP58    | NOP58 Ribonucleoprotein                                           | 1.99 |
| NPNT     | Nephronectin                                                      | 1.99 |
| NLRP6    | NLR Family Pyrin Domain Containing 6                              | 1.99 |
| SLC25A28 | Solute Carrier Family 25 Member 28                                | 1.99 |
| SHOX     | Short Stature Homeobox                                            | 1.99 |
| NPRL3    | NPR3 Like, GATOR1 Complex Subunit                                 | 1.99 |
| PTGFRN   | Prostaglandin F2 Receptor Inhibitor                               | 1.99 |
| TOR1B    | Torsin Family 1 Member B                                          | 1.99 |
| TSLP     | Thymic Stromal Lymphopoietin                                      | 1.99 |
| ST13     | ST13 Hsp70 Interacting Protein                                    | 1.99 |
| IRGM     | Immunity Related GTPase M                                         | 1.99 |
| RAB34    | RAB34, Member RAS Oncogene Family                                 | 1.99 |



|         |                                                              |      |
|---------|--------------------------------------------------------------|------|
| KARS1   | Lysyl-TRNA Synthetase 1                                      | 1.99 |
| PSMD5   | Proteasome 26S Subunit, Non-ATPase 5                         | 1.99 |
| OTUB2   | OTU Deubiquitinase, Ubiquitin Aldehyde Binding 2             | 1.99 |
| SULT1A3 | Sulfotransferase Family 1A Member 3                          | 1.99 |
| STK40   | Serine/Threonine Kinase 40                                   | 1.99 |
| WDR48   | WD Repeat Domain 48                                          | 1.99 |
| ZNF23   | Zinc Finger Protein 23                                       | 1.99 |
| XAB2    | XPA Binding Protein 2                                        | 1.99 |
| C1QTNF6 | C1q And TNF Related 6                                        | 1.99 |
| CCL26   | C-C Motif Chemokine Ligand 26                                | 1.99 |
| GOLGB1  | Golgin B1                                                    | 1.99 |
| FGGY    | FGGY Carbohydrate Kinase Domain Containing                   | 1.99 |
| ARFRP1  | ADP Ribosylation Factor Related Protein 1                    | 1.99 |
| MAGEA1  | MAGE Family Member A1                                        | 1.99 |
| MAGEA11 | MAGE Family Member A11                                       | 1.99 |
| LY86    | Lymphocyte Antigen 86                                        | 1.99 |
| ALYREF  | Aly/REF Export Factor                                        | 1.99 |
| AJUBA   | Ajuba LIM Protein                                            | 1.99 |
| MED28   | Mediator Complex Subunit 28                                  | 1.99 |
| MBNL2   | Muscleblind Like Splicing Regulator 2                        | 1.99 |
| CLEC4E  | C-Type Lectin Domain Family 4 Member E                       | 1.99 |
| HEPHL1  | Hephaestin Like 1                                            | 1.99 |
| CELA3B  | Chymotrypsin Like Elastase 3B                                | 1.99 |
| CELF1   | CUGBP Elav-Like Family Member 1                              | 1.99 |
| CENPB   | Centromere Protein B                                         | 1.99 |
| CDR2    | Cerebellar Degeneration Related Protein 2                    | 1.99 |
| HES7    | Hes Family BHLH Transcription Factor 7                       | 1.99 |
| CLPTM1  | CLPTM1 Regulator Of GABA Type A Receptor Forward Trafficking | 1.99 |
| RFXAP   | Regulatory Factor X Associated Protein                       | 1.99 |
| CFHR2   | Complement Factor H Related 2                                | 1.99 |
| DPYSL5  | Dihydropyrimidinase Like 5                                   | 1.99 |
| GPN1    | GPN-Loop GTPase 1                                            | 1.99 |
| MRGPRX2 | MAS Related GPR Family Member X2                             | 1.99 |
| RNF111  | Ring Finger Protein 111                                      | 1.99 |
| SPIN1   | Spindlin 1                                                   | 1.99 |
| PEX11A  | Peroxisomal Biogenesis Factor 11 Alpha                       | 1.99 |
| PRPF19  | Pre-mRNA Processing Factor 19                                | 1.99 |
| SERINC3 | Serine Incorporator 3                                        | 1.99 |
| PPP1R3B | Protein Phosphatase 1 Regulatory Subunit 3B                  | 1.99 |
| IFT80   | Intraflagellar Transport 80                                  | 1.99 |

|          |                                                     |      |
|----------|-----------------------------------------------------|------|
| SNRPB2   | Small Nuclear Ribonucleoprotein Polypeptide B2      | 1.99 |
| NLRP5    | NLR Family Pyrin Domain Containing 5                | 1.99 |
| PKP3     | Plakophilin 3                                       | 1.99 |
| OSBPL3   | Oxysterol Binding Protein Like 3                    | 1.99 |
| POC1A    | POC1 Centriolar Protein A                           | 1.99 |
| PLRG1    | Pleiotropic Regulator 1                             | 1.99 |
| SENP6    | SUMO Specific Peptidase 6                           | 1.99 |
| IL9R     | Interleukin 9 Receptor                              | 1.99 |
| PTER     | Phosphotriesterase Related                          | 1.99 |
| PIEZO1   | Piezo Type Mechanosensitive Ion Channel Component 1 | 1.99 |
| SRRT     | Serrate, RNA Effector Molecule                      | 1.99 |
| TRIM68   | Tripartite Motif Containing 68                      | 1.99 |
| TXNDC15  | Thioredoxin Domain Containing 15                    | 1.99 |
| TAGAP    | T Cell Activation RhoGTPase Activating Protein      | 1.99 |
| KLRC2    | Killer Cell Lectin Like Receptor C2                 | 1.99 |
| TMEM231  | Transmembrane Protein 231                           | 1.99 |
| DYNC1LI1 | Dynein Cytoplasmic 1 Light Intermediate Chain 1     | 1.99 |
| DTL      | Denticleless E3 Ubiquitin Protein Ligase Homolog    | 1.99 |
| SAMM50   | SAMM50 Sorting And Assembly Machinery Component     | 1.99 |
| POLD4    | DNA Polymerase Delta 4, Accessory Subunit           | 1.99 |
| RAB3IP   | RAB3A Interacting Protein                           | 1.99 |
| PACRG    | Parkin Coregulated                                  | 1.99 |
| IL4I1    | Interleukin 4 Induced 1                             | 1.99 |
| TGOLN2   | Trans-Golgi Network Protein 2                       | 1.99 |
| KRT6C    | Keratin 6C                                          | 1.99 |
| WDR72    | WD Repeat Domain 72                                 | 1.99 |
| GAR1     | GAR1 Ribonucleoprotein                              | 1.99 |
| CCP110   | Centriolar Coiled-Coil Protein 110                  | 1.99 |
| AQR      | Aquarius Intron-Binding Spliceosomal Factor         | 1.99 |
| LUC7L2   | LUC7 Like 2, Pre-mRNA Splicing Factor               | 1.99 |
| MAGEA3   | MAGE Family Member A3                               | 1.99 |
| LRRC2    | Leucine Rich Repeat Containing 2                    | 1.99 |
| ANKMY1   | Ankyrin Repeat And MYND Domain Containing 1         | 1.99 |
| EPRS1    | Glutamyl-Prolyl-TRNA Synthetase 1                   | 1.99 |
| ERH      | ERH mRNA Splicing And Mitosis Factor                | 1.99 |
| AGBL1    | ATP/GTP Binding Protein Like 1                      | 1.99 |
| MBNL3    | Muscleblind Like Splicing Regulator 3               | 1.99 |
| AARS1    | Alanyl-TRNA Synthetase 1                            | 1.99 |
| CLEC6A   | C-Type Lectin Domain Containing 6A                  | 1.99 |
| FOXJ1    | Forkhead Box J1                                     | 1.99 |
| GPR174   | G Protein-Coupled Receptor 174                      | 1.99 |

|          |                                                                                        |      |
|----------|----------------------------------------------------------------------------------------|------|
| CELA1    | Chymotrypsin Like Elastase 1                                                           | 1.99 |
| CLPTM1L  | CLPTM1 Like                                                                            | 1.99 |
| CLDN15   | Claudin 15                                                                             | 1.99 |
| MMEL1    | Membrane Metalloendopeptidase Like 1                                                   | 1.99 |
| MIXL1    | Mix Paired-Like Homeobox                                                               | 1.99 |
| HBQ1     | Hemoglobin Subunit Theta 1                                                             | 1.99 |
| CEP89    | Centrosomal Protein 89                                                                 | 1.99 |
| MMS19    | MMS19 Homolog, Cytosolic Iron-Sulfur Assembly Component                                | 1.99 |
| DMTN     | Dematin Actin Binding Protein                                                          | 1.99 |
| MTUS1    | Microtubule Associated Scaffold Protein 1                                              | 1.99 |
| MORC3    | MORC Family CW-Type Zinc Finger 3                                                      | 1.99 |
| RNF207   | Ring Finger Protein 207                                                                | 1.99 |
| HARS1    | Histidyl-TRNA Synthetase 1                                                             | 1.99 |
| CST2     | Cystatin SA                                                                            | 1.99 |
| NDUFAF5  | NADH:Ubiquinone Oxidoreductase Complex Assembly Factor 5                               | 1.99 |
| NEK10    | NIMA Related Kinase 10                                                                 | 1.99 |
| IL17C    | Interleukin 17C                                                                        | 1.99 |
| SERINC2  | Serine Incorporator 2                                                                  | 1.99 |
| PAMR1    | Peptidase Domain Containing Associated With Muscle Regeneration 1                      | 1.99 |
| SNX19    | Sorting Nexin 19                                                                       | 1.99 |
| PRICKLE4 | Prickle Planar Cell Polarity Protein 4                                                 | 1.99 |
| SAA2     | Serum Amyloid A2                                                                       | 1.99 |
| SCCPDH   | Saccharopine Dehydrogenase (Putative)                                                  | 1.99 |
| HSPBP1   | HSPA (Hsp70) Binding Protein 1                                                         | 1.99 |
| PMCH     | Pro-Melanin Concentrating Hormone                                                      | 1.99 |
| OGFOD1   | 2-Oxoglutarate And Iron Dependent Oxygenase Domain Containing 1                        | 1.99 |
| SENp7    | SUMO Specific Peptidase 7                                                              | 1.99 |
| PHF11    | PHD Finger Protein 11                                                                  | 1.99 |
| LARS1    | Leucyl-TRNA Synthetase 1                                                               | 1.99 |
| TRIM35   | Tripartite Motif Containing 35                                                         | 1.99 |
| LECT2    | Leukocyte Cell Derived Chemotaxin 2                                                    | 1.99 |
| KNTC1    | Kinetochore Associated 1                                                               | 1.99 |
| KIR3DL3  | Killer Cell Immunoglobulin Like Receptor, Three Ig Domains And Long Cytoplasmic Tail 3 | 1.99 |
| TMEM216  | Transmembrane Protein 216                                                              | 1.99 |
| TMEM138  | Transmembrane Protein 138                                                              | 1.99 |
| E4F1     | E4F Transcription Factor 1                                                             | 1.99 |
| NECTIN2  | Nectin Cell Adhesion Molecule 2                                                        | 1.99 |
| POMGNT2  | Protein O-Linked Mannose N-Acetylglucosaminyltransferase 2 (Beta 1,4-)                 | 1.99 |

|          |                                                     |      |
|----------|-----------------------------------------------------|------|
| POPDC2   | Popeye Domain Containing 2                          | 1.99 |
| SYCP1    | Synaptonemal Complex Protein 1                      | 1.99 |
| TIMD4    | T Cell Immunoglobulin And Mucin Domain Containing 4 | 1.99 |
| WBP11    | WW Domain Binding Protein 11                        | 1.99 |
| YARS1    | Tyrosyl-TRNA Synthetase 1                           | 1.99 |
| UBR3     | Ubiquitin Protein Ligase E3 Component N-Recognin 3  | 1.99 |
| BBS12    | Bardet-Biedl Syndrome 12                            | 1.99 |
| CABP7    | Calcium Binding Protein 7                           | 1.99 |
| MARS1    | Methionyl-TRNA Synthetase 1                         | 1.99 |
| EVPL     | Envoplakin                                          | 1.99 |
| EXOC6B   | Exocyst Complex Component 6B                        | 1.99 |
| FAM107B  | Family With Sequence Similarity 107 Member B        | 1.99 |
| MAGEA10  | MAGE Family Member A10                              | 1.99 |
| MAGEA6   | MAGE Family Member A6                               | 1.99 |
| ALKBH1   | AlkB Homolog 1, Histone H2A Dioxygenase             | 1.99 |
| MESP2    | Mesoderm Posterior BHLH Transcription Factor 2      | 1.99 |
| CROCC    | Ciliary Rootlet Coiled-Coil, Rootletin              | 1.99 |
| GXYLT1   | Glucoside Xylosyltransferase 1                      | 1.99 |
| COMMD6   | COMM Domain Containing 6                            | 1.99 |
| CFHR4    | Complement Factor H Related 4                       | 1.99 |
| DNAJC21  | DnaJ Heat Shock Protein Family (Hsp40) Member C21   | 1.99 |
| MRPL38   | Mitochondrial Ribosomal Protein L38                 | 1.99 |
| DMWD     | DM1 Locus, WD Repeat Containing                     | 1.99 |
| EFHC2    | EF-Hand Domain Containing 2                         | 1.99 |
| GPKOW    | G-Patch Domain And KOW Motifs                       | 1.99 |
| MOSPD1   | Motile Sperm Domain Containing 1                    | 1.99 |
| MOB3B    | MOB Kinase Activator 3B                             | 1.99 |
| DCLRE1A  | DNA Cross-Link Repair 1A                            | 1.99 |
| CPNE2    | Copine 2                                            | 1.99 |
| SCT      | Secretin                                            | 1.99 |
| SCHIP1   | Schwannomin Interacting Protein 1                   | 1.99 |
| SARS1    | Seryl-TRNA Synthetase 1                             | 1.99 |
| NUP188   | Nucleoporin 188                                     | 1.99 |
| SLC22A15 | Solute Carrier Family 22 Member 15                  | 1.99 |
| PHRF1    | PHD And Ring Finger Domains 1                       | 1.99 |
| LACC1    | Laccase Domain Containing 1                         | 1.99 |
| UBR7     | Ubiquitin Protein Ligase E3 Component N-Recognin 7  | 1.99 |
| TRIM40   | Tripartite Motif Containing 40                      | 1.99 |
| TXNDC2   | Thioredoxin Domain Containing 2                     | 1.99 |
| PTPA     | Protein Phosphatase 2 Phosphatase Activator         | 1.99 |
| PUS10    | Pseudouridine Synthase 10                           | 1.99 |

|         |                                                                     |      |
|---------|---------------------------------------------------------------------|------|
| KCNRG   | Potassium Channel Regulator                                         | 1.99 |
| KIF24   | Kinesin Family Member 24                                            | 1.99 |
| TMEM79  | Transmembrane Protein 79                                            | 1.99 |
| CENPI   | Centromere Protein I                                                | 1.99 |
| WDFY4   | WDFY Family Member 4                                                | 1.99 |
| ZRSR2   | Zinc Finger CCCH-Type, RNA Binding Motif And Serine/Arginine Rich 2 | 1.99 |
| MAGEA8  | MAGE Family Member A8                                               | 1.99 |
| AFDN    | Afadin, Adherens Junction Formation Factor                          | 1.99 |
| RMND5B  | Required For Meiotic Nuclear Division 5 Homolog B                   | 1.99 |
| CBLIF   | Cobalamin Binding Intrinsic Factor                                  | 1.99 |
| CEP97   | Centrosomal Protein 97                                              | 1.99 |
| H3-3A   | H3.3 Histone A                                                      | 1.99 |
| MTUS2   | Microtubule Associated Scaffold Protein 2                           | 1.99 |
| RRS1    | Ribosome Biogenesis Regulator 1 Homolog                             | 1.99 |
| SYAP1   | Synapse Associated Protein 1                                        | 1.99 |
| KIF19   | Kinesin Family Member 19                                            | 1.99 |
| NOL7    | Nucleolar Protein 7                                                 | 1.99 |
| POLN    | DNA Polymerase Nu                                                   | 1.99 |
| KRT73   | Keratin 73                                                          | 1.99 |
| WDTC1   | WD And Tetratricopeptide Repeats 1                                  | 1.99 |
| ZFP3    | ZFP3 Zinc Finger Protein                                            | 1.99 |
| TRIM47  | Tripartite Motif Containing 47                                      | 1.99 |
| WIZ     | WIZ Zinc Finger                                                     | 1.99 |
| C3orf52 | Chromosome 3 Open Reading Frame 52                                  | 1.99 |
| ATAD5   | ATPase Family AAA Domain Containing 5                               | 1.99 |
| FBXL15  | F-Box And Leucine Rich Repeat Protein 15                            | 1.99 |
| ANKRD55 | Ankyrin Repeat Domain 55                                            | 1.99 |
| METTL4  | Methyltransferase Like 4                                            | 1.99 |
| BPIFB1  | BPI Fold Containing Family B Member 1                               | 1.99 |
| MELTF   | Melanotransferrin                                                   | 1.99 |
| CTAGE1  | Cutaneous T Cell Lymphoma-Associated Antigen 1                      | 1.99 |
| CDX4    | Caudal Type Homeobox 4                                              | 1.99 |
| HAUS3   | HAUS Augmin Like Complex Subunit 3                                  | 1.99 |
| H3-3B   | H3.3 Histone B                                                      | 1.99 |
| H4-16   | H4 Histone 16                                                       | 1.99 |
| EIF1AD  | Eukaryotic Translation Initiation Factor 1A Domain Containing       | 1.99 |
| NECTIN3 | Nectin Cell Adhesion Molecule 3                                     | 1.99 |
| EME2    | Essential Meiotic Structure-Specific Endonuclease Subunit 2         | 1.99 |
| SKOR1   | SKI Family Transcriptional Corepressor 1                            | 1.99 |
| SNRNP48 | Small Nuclear Ribonucleoprotein U11/U12 Subunit 48                  | 1.99 |

|         |                                                         |      |
|---------|---------------------------------------------------------|------|
| ENDOU   | Endonuclease, Poly(U) Specific                          | 1.99 |
| SLX1B   | SLX1 Homolog B, Structure-Specific Endonuclease Subunit | 1.99 |
| POC5    | POC5 Centriolar Protein                                 | 1.99 |
| RPS4Y1  | Ribosomal Protein S4 Y-Linked 1                         | 1.99 |
| TRIM42  | Tripartite Motif Containing 42                          | 1.99 |
| TRIM60  | Tripartite Motif Containing 60                          | 1.99 |
| TRUB2   | TruB Pseudouridine Synthase Family Member 2             | 1.99 |
| TSPY1   | Testis Specific Protein Y-Linked 1                      | 1.99 |
| KDF1    | Keratinocyte Differentiation Factor 1                   | 1.99 |
| KAZN    | Kazrin, Periplakin Interacting Protein                  | 1.99 |
| TMIE    | Transmembrane Inner Ear                                 | 1.99 |
| PRIMPOL | Primase And DNA Directed Polymerase                     | 1.99 |
| NAF1    | Nuclear Assembly Factor 1 Ribonucleoprotein             | 1.99 |
| SCLT1   | Sodium Channel And Clathrin Linker 1                    | 1.99 |
| NOL10   | Nucleolar Protein 10                                    | 1.99 |
| OTOG    | Otogelin                                                | 1.99 |
| PSMB11  | Proteasome Subunit Beta 11                              | 1.99 |
| XXYLT1  | Xyloside Xylosyltransferase 1                           | 1.99 |
| CARS1   | CysteinyI-TRNA Synthetase 1                             | 1.99 |
| ESX1    | ESX Homeobox 1                                          | 1.99 |
| MAGEA9  | MAGE Family Member A9                                   | 1.99 |
| CLEC4C  | C-Type Lectin Domain Family 4 Member C                  | 1.99 |
| DMBX1   | Diencephalon/Mesencephalon Homeobox 1                   | 1.99 |
| CD300LD | CD300 Molecule Like Family Member D                     | 1.99 |
| CSH2    | Chorionic Somatomammotropin Hormone 2                   | 1.99 |
| SFTA3   | Surfactant Associated 3                                 | 1.99 |
| IGHG1   | Immunoglobulin Heavy Constant Gamma 1 (G1m Marker)      | 1.99 |
| ENDOV   | Endonuclease V                                          | 1.99 |
| OAF     | Out At First Homolog                                    | 1.99 |
| NPS     | Neuropeptide S                                          | 1.99 |
| NUDT18  | Nudix Hydrolase 18                                      | 1.99 |
| SPTSSB  | Serine Palmitoyltransferase Small Subunit B             | 1.99 |
| L3MBTL4 | L3MBTL Histone Methyl-Lysine Binding Protein 4          | 1.99 |
| TXNDC16 | Thioredoxin Domain Containing 16                        | 1.99 |
| PRIMA1  | Proline Rich Membrane Anchor 1                          | 1.99 |
| N4BP3   | NEDD4 Binding Protein 3                                 | 1.99 |
| VSIR    | V-Set Immunoregulatory Receptor                         | 1.99 |
| CCDC122 | Coiled-Coil Domain Containing 122                       | 1.99 |
| FABP12  | Fatty Acid Binding Protein 12                           | 1.99 |
| MAGEA2  | MAGE Family Member A2                                   | 1.99 |
| MT-CYB  | Mitochondrially Encoded Cytochrome B                    | 1.99 |

|          |                                                                              |      |
|----------|------------------------------------------------------------------------------|------|
| MYZAP    | Myocardial Zonula Adherens Protein                                           | 1.99 |
| GPR148   | G Protein-Coupled Receptor 148                                               | 1.99 |
| IGHM     | Immunoglobulin Heavy Constant Mu                                             | 1.99 |
| RSPH6A   | Radial Spoke Head 6 Homolog A                                                | 1.99 |
| RTP1     | Receptor Transporter Protein 1                                               | 1.99 |
| SMR3B    | Submaxillary Gland Androgen Regulated Protein 3B                             | 1.99 |
| OR6C2    | Olfactory Receptor Family 6 Subfamily C Member 2                             | 1.99 |
| TRIM34   | Tripartite Motif Containing 34                                               | 1.99 |
| TVP23A   | Trans-Golgi Network Vesicle Protein 23 Homolog A                             | 1.99 |
| TEPP     | Testis, Prostate And Placenta Expressed                                      | 1.99 |
| TECTB    | Tectorin Beta                                                                | 1.99 |
| TMEM17   | Transmembrane Protein 17                                                     | 1.99 |
| FAAP24   | FA Core Complex Associated Protein 24                                        | 1.99 |
| ARHGAP40 | Rho GTPase Activating Protein 40                                             | 1.99 |
| RNASE10  | Ribonuclease A Family Member 10 (Inactive)                                   | 1.99 |
| CDR1     | Cerebellar Degeneration Related Protein 1                                    | 1.99 |
| CGB7     | Chorionic Gonadotropin Subunit Beta 7                                        | 1.99 |
| CXorf21  | Chromosome X Open Reading Frame 21                                           | 1.99 |
| SLX1A    | SLX1 Homolog A, Structure-Specific Endonuclease Subunit                      | 1.99 |
| JMJD8    | Jumonji Domain Containing 8                                                  | 1.99 |
| TENT4A   | Terminal Nucleotidyltransferase 4A                                           | 1.99 |
| TEN1     | TEN1 Subunit Of CST Complex                                                  | 1.99 |
| HLA-DRB4 | Major Histocompatibility Complex, Class II, DR Beta 4                        | 1.99 |
| CACTIN   | Cactin, Spliceosome C Complex Subunit                                        | 1.99 |
| MCIDAS   | Multiciliate Differentiation And DNA Synthesis Associated Cell Cycle Protein | 1.99 |
| CGAS     | Cyclic GMP-AMP Synthase                                                      | 1.99 |
| H3C14    | H3 Clustered Histone 14                                                      | 1.99 |
| CIAO2B   | Cytosolic Iron-Sulfur Assembly Component 2B                                  | 1.99 |
| GPR137C  | G Protein-Coupled Receptor 137C                                              | 1.99 |
| OR10H4   | Olfactory Receptor Family 10 Subfamily H Member 4                            | 1.99 |
| TENT4B   | Terminal Nucleotidyltransferase 4B                                           | 1.99 |
| C10orf99 | Chromosome 10 Open Reading Frame 99                                          | 1.99 |
| MAGEA2B  | MAGE Family Member A2B                                                       | 1.99 |
| CEP295   | Centrosomal Protein 295                                                      | 1.99 |
| CPLANE1  | Ciliogenesis And Planar Polarity Effector 1                                  | 1.99 |
| KATNIP   | Katanin Interacting Protein                                                  | 1.99 |
| DENND2B  | DENN Domain Containing 2B                                                    | 1.99 |
| PIFO     | Primary Cilia Formation                                                      | 1.99 |
| MAGEA5   | MAGE Family Member A5                                                        | 1.99 |
| CGB8     | Chorionic Gonadotropin Subunit Beta 8                                        | 1.99 |

|           |                                                        |      |
|-----------|--------------------------------------------------------|------|
| PLPPR3    | Phospholipid Phosphatase Related 3                     | 1.99 |
| ODAPH     | Odontogenesis Associated Phosphoprotein                | 1.99 |
| YIPF7     | Yip1 Domain Family Member 7                            | 1.99 |
| ATXN8OS   | ATXN8 Opposite Strand LncRNA                           | 1.99 |
| MUCL3     | Mucin Like 3                                           | 1.99 |
| SRARP     | Steroid Receptor Associated And Regulated Protein      | 1.99 |
| PEDS1     | Plasmanylethanolamine Desaturase 1                     | 1.99 |
| RPEL1     | Ribulose-5-Phosphate-3-Epimerase Like 1                | 1.99 |
| MIR21     | MicroRNA 21                                            | 1.99 |
| MALAT1    | Metastasis Associated Lung Adenocarcinoma Transcript 1 | 1.99 |
| ERFE      | Erythroferrone                                         | 1.99 |
| MIR184    | MicroRNA 184                                           | 1.99 |
| NEAT1     | Nuclear Paraspeckle Assembly Transcript 1              | 1.99 |
| KRTAP19-2 | Keratin Associated Protein 19-2                        | 1.99 |
| MIR146A   | MicroRNA 146a                                          | 1.99 |
| GNAS-AS1  | GNAS Antisense RNA 1                                   | 1.99 |
| MIR27A    | MicroRNA 27a                                           | 1.99 |
| MIR150    | MicroRNA 150                                           | 1.99 |
| MIR10A    | MicroRNA 10a                                           | 1.99 |
| MIR185    | MicroRNA 185                                           | 1.99 |
| MIR192    | MicroRNA 192                                           | 1.99 |
| MIR210    | MicroRNA 210                                           | 1.99 |
| MIR99A    | MicroRNA 99a                                           | 1.99 |
| MIR499A   | MicroRNA 499a                                          | 1.99 |
| MIR433    | MicroRNA 433                                           | 1.99 |
| MIR23A    | MicroRNA 23a                                           | 1.99 |
| MIR320A   | MicroRNA 320a                                          | 1.99 |
| MEG8      | Maternally Expressed 8, Small Nucleolar RNA Host Gene  | 1.99 |
| MIR30A    | MicroRNA 30a                                           | 1.99 |
| MIR615    | MicroRNA 615                                           | 1.99 |
| MIRLET7E  | MicroRNA Let-7e                                        | 1.99 |
| EGOT      | Eosinophil Granule Ontogeny Transcript                 | 1.99 |
| MIR195    | MicroRNA 195                                           | 1.99 |
| MIR345    | MicroRNA 345                                           | 1.99 |
| MIR197    | MicroRNA 197                                           | 1.99 |
| MIR148A   | MicroRNA 148a                                          | 1.99 |
| MIR15B    | MicroRNA 15b                                           | 1.99 |
| MIR134    | MicroRNA 134                                           | 1.99 |
| MIR346    | MicroRNA 346                                           | 1.99 |
| MIR208A   | MicroRNA 208a                                          | 1.99 |
| MIR423    | MicroRNA 423                                           | 1.99 |



|                    |                                            |      |
|--------------------|--------------------------------------------|------|
| MIR324             | MicroRNA 324                               | 1.99 |
| C11orf98           | Chromosome 11 Open Reading Frame 98        | 1.99 |
| MIR33A             | MicroRNA 33a                               | 1.99 |
| MIR484             | MicroRNA 484                               | 1.99 |
| RNU6-1             | RNA, U6 Small Nuclear 1                    | 1.99 |
| SCARNA8            | Small Cajal Body-Specific RNA 8            | 1.99 |
| MIR130B            | MicroRNA 130b                              | 1.99 |
| MIR296             | MicroRNA 296                               | 1.99 |
| MIR654             | MicroRNA 654                               | 1.99 |
| MIR675             | MicroRNA 675                               | 1.99 |
| MIR612             | MicroRNA 612                               | 1.99 |
| MIR638             | MicroRNA 638                               | 1.99 |
| MIR381             | MicroRNA 381                               | 1.99 |
| MIR494             | MicroRNA 494                               | 1.99 |
| SNORD63            | Small Nucleolar RNA, C/D Box 63            | 1.99 |
| RTKL1-<br>TNFRSF6B | RTKL1-TNFRSF6B Readthrough (NMD Candidate) | 1.99 |
| TRA                | T Cell Receptor Alpha Locus                | 1.99 |
| MIR608             | MicroRNA 608                               | 1.99 |
| SNORA56            | Small Nucleolar RNA, H/ACA Box 56          | 1.99 |
| MIR1304            | MicroRNA 1304                              | 1.99 |
| FLG-AS1            | FLG Antisense RNA 1                        | 1.99 |
| MIR198             | MicroRNA 198                               | 1.99 |
| MIR518B            | MicroRNA 518b                              | 1.99 |
| MIR557             | MicroRNA 557                               | 1.99 |
| MIR575             | MicroRNA 575                               | 1.99 |
| MIR601             | MicroRNA 601                               | 1.99 |
| MIR657             | MicroRNA 657                               | 1.99 |
| MIR637             | MicroRNA 637                               | 1.99 |
| MIR642A            | MicroRNA 642a                              | 1.99 |
| MIR92B             | MicroRNA 92b                               | 1.99 |
| MIR769             | MicroRNA 769                               | 1.99 |
| DLGAP1-AS1         | DLGAP1 Antisense RNA 1                     | 1.99 |
| DLGAP1-AS2         | DLGAP1 Antisense RNA 2                     | 1.99 |
| MIR486-1           | MicroRNA 486-1                             | 1.99 |
| RNU5A-1            | RNA, U5A Small Nuclear 1                   | 1.99 |
| RNU11              | RNA, U11 Small Nuclear                     | 1.99 |
| SNORA15            | Small Nucleolar RNA, H/ACA Box 15          | 1.99 |
| SNORA24            | Small Nucleolar RNA, H/ACA Box 24          | 1.99 |
| SNORA67            | Small Nucleolar RNA, H/ACA Box 67          | 1.99 |
| SNORA49            | Small Nucleolar RNA, H/ACA Box 49          | 1.99 |

|                 |                                                                               |      |
|-----------------|-------------------------------------------------------------------------------|------|
| MIR548AA1       | MicroRNA 548aa-1                                                              | 1.99 |
| MIR583          | MicroRNA 583                                                                  | 1.99 |
| MIR662          | MicroRNA 662                                                                  | 1.99 |
| MIR663A         | MicroRNA 663a                                                                 | 1.99 |
| DUX4L7          | Double Homeobox 4 Like 7 (Pseudogene)                                         | 1.99 |
| MIR600          | MicroRNA 600                                                                  | 1.99 |
| MIR658          | MicroRNA 658                                                                  | 1.99 |
| MIR611          | MicroRNA 611                                                                  | 1.99 |
| SNORD28         | Small Nucleolar RNA, C/D Box 28                                               | 1.99 |
| PARTICL         | Promoter Of MAT2A Antisense Radiation-Induced Circulating Long Non-Coding RNA | 1.99 |
| LINC00309       | Long Intergenic Non-Protein Coding RNA 309                                    | 1.99 |
| MIR4260         | MicroRNA 4260                                                                 | 1.99 |
| MIR325          | MicroRNA 325                                                                  | 1.99 |
| ALMS1P1         | ALMS1 Pseudogene 1                                                            | 1.99 |
| MIR596          | MicroRNA 596                                                                  | 1.99 |
| MIR602          | MicroRNA 602                                                                  | 1.99 |
| MIR622          | MicroRNA 622                                                                  | 1.99 |
| LINC01193       | Long Intergenic Non-Protein Coding RNA 1193                                   | 1.99 |
| MIR663AHG       | MIR663A Host Gene                                                             | 1.99 |
| MIR4673         | MicroRNA 4673                                                                 | 1.99 |
| TRG             | T Cell Receptor Gamma Locus                                                   | 1.99 |
| LINC02551       | Long Intergenic Non-Protein Coding RNA 2551                                   | 1.99 |
| TRI-AAT4-1      | TRNA-Ile (Anticodon AAT) 4-1                                                  | 1.99 |
| TRT-AGT1-2      | TRNA-Thr (Anticodon AGT) 1-2                                                  | 1.99 |
| RNU12-2P        | RNA, U12 Small Nuclear 2, Pseudogene                                          | 1.99 |
| LOC105372273    | Uncharacterized LOC105372273                                                  | 1.99 |
| TRS-AGA2-6      | TRNA-Ser (Anticodon AGA) 2-6                                                  | 1.99 |
| ABCD1P4         | ATP Binding Cassette Subfamily D Member 1 Pseudogene 4                        | 1.99 |
| ABCD1P2         | ATP Binding Cassette Subfamily D Member 1 Pseudogene 2                        | 1.99 |
| ABCD1P3         | ATP Binding Cassette Subfamily D Member 1 Pseudogene 3                        | 1.99 |
| ENSG00000207300 |                                                                               | 1.99 |
| LOC108783645    | HFE Antisense RNA                                                             | 1.99 |
| ENSG00000266919 |                                                                               | 1.99 |
| ABCD1P1         | ATP Binding Cassette Subfamily D Member 1 Pseudogene 1                        | 1.99 |
| IGES            | Immunoglobulin E Concentration, Serum                                         | 1.99 |
| PIRC2           | Piwi-Interacting RNA Cluster 2                                                | 1.99 |
| AGMX2           | Agammaglobulinemia, X-Linked 2 (With Growth Hormone Deficiency)               | 1.99 |
| EEC1            | Ectrodactyly, Ectodermal Dysplasia And Cleft Lip/Palate Syndrome 1            | 1.99 |
| SLEN3           | Systemic Lupus Erythematosus With Nephritis 3                                 | 1.99 |

|              |                                                      |      |
|--------------|------------------------------------------------------|------|
| SLEH1        | Systemic Lupus Erythematosus With Hemolytic Anemia 1 | 1.99 |
| SLN1         | Systemic Lupus Erythematosus With Nephritis 1        | 1.99 |
| SLN2         | Systemic Lupus Erythematosus With Nephritis 2        | 1.99 |
| AOS          | Adams-Oliver Syndrome                                | 1.99 |
| HYP10        | Hypotrichosis 10                                     | 1.99 |
| LOC113687175 | Sharpr-MPRA Regulatory Region 4647                   | 1.99 |
| LOC108167311 | Proximal ADA Alu-Mediated Recombination Region       | 1.99 |
| LOC108167312 | Distal ADA Alu-Mediated Recombination Region         | 1.99 |
| LOC107303343 | Adenosine Deaminase Intronic Regulatory Elements     | 1.99 |
| THRB         | Thyroid Hormone Receptor Beta                        | 1.88 |
| SOX9         | SRY-Box Transcription Factor 9                       | 1.75 |
| RXRA         | Retinoid X Receptor Alpha                            | 1.73 |
| PDPN         | Podoplanin                                           | 1.73 |
| RNASEH2CP1   | Ribonuclease H2 Subunit C Pseudogene 1               | 1.73 |
| NCOR1        | Nuclear Receptor Corepressor 1                       | 1.69 |
| NR5A1        | Nuclear Receptor Subfamily 5 Group A Member 1        | 1.64 |
| NES          | Nestin                                               | 1.64 |
| UCN          | Urocortin                                            | 1.64 |
| ZDHHC13      | Zinc Finger DHHC-Type Palmitoyltransferase 13        | 1.64 |
| WT1          | WT1 Transcription Factor                             | 1.58 |
| ADRA1A       | Adrenoceptor Alpha 1A                                | 1.58 |
| BIRC5        | Baculoviral IAP Repeat Containing 5                  | 1.58 |
| PTGS1        | Prostaglandin-Endoperoxide Synthase 1                | 1.58 |
| ICAM2        | Intercellular Adhesion Molecule 2                    | 1.58 |
| TSHR         | Thyroid Stimulating Hormone Receptor                 | 1.5  |
| NR4A1        | Nuclear Receptor Subfamily 4 Group A Member 1        | 1.5  |
| F8           | Coagulation Factor VIII                              | 1.5  |
| TCF7L2       | Transcription Factor 7 Like 2                        | 1.5  |
| ACP1         | Acid Phosphatase 1                                   | 1.5  |
| MED1         | Mediator Complex Subunit 1                           | 1.5  |
| MCHR2        | Melanin Concentrating Hormone Receptor 2             | 1.5  |
| CXCL2        | C-X-C Motif Chemokine Ligand 2                       | 1.5  |
| SPATA5       | Spermatogenesis Associated 5                         | 1.5  |
| HSPA1B       | Heat Shock Protein Family A (Hsp70) Member 1B        | 1.5  |
| ZPR1         | ZPR1 Zinc Finger                                     | 1.5  |
| FCGR1B       | Fc Fragment Of IgG Receptor 1b                       | 1.5  |
| TBXT         | T-Box Transcription Factor T                         | 1.5  |
| MIR30B       | MicroRNA 30b                                         | 1.5  |
| BCL2         | BCL2 Apoptosis Regulator                             | 1.4  |
| THADA        | THADA Armadillo Repeat Containing                    | 1.39 |
| PTGES        | Prostaglandin E Synthase                             | 1.31 |

|         |                                                                    |      |
|---------|--------------------------------------------------------------------|------|
| HSD11B1 | Hydroxysteroid 11-Beta Dehydrogenase 1                             | 1.21 |
| FPR1    | Formyl Peptide Receptor 1                                          | 1.21 |
| FPR2    | Formyl Peptide Receptor 2                                          | 1.21 |
| LTBP1   | Latent Transforming Growth Factor Beta Binding Protein 1           | 1.21 |
| FPR3    | Formyl Peptide Receptor 3                                          | 1.21 |
| RUNX1   | RUNX Family Transcription Factor 1                                 | 1.14 |
| ANGPT1  | Angiopoietin 1                                                     | 1.14 |
| DFFA    | DNA Fragmentation Factor Subunit Alpha                             | 1.14 |
| COPB2   | COPI Coat Complex Subunit Beta 2                                   | 1.14 |
| KCNE1   | Potassium Voltage-Gated Channel Subfamily E Regulatory Subunit 1   | 1.14 |
| FAF1    | Fas Associated Factor 1                                            | 1.14 |
| DKK2    | Dickkopf WNT Signaling Pathway Inhibitor 2                         | 1.14 |
| RUNX3   | RUNX Family Transcription Factor 3                                 | 1.14 |
| RSPO2   | R-Spondin 2                                                        | 1.14 |
| PLCD4   | Phospholipase C Delta 4                                            | 1.14 |
| RCAN1   | Regulator Of Calcineurin 1                                         | 1.14 |
| TLE3    | TLE Family Member 3, Transcriptional Corepressor                   | 1.14 |
| CDCA7   | Cell Division Cycle Associated 7                                   | 1.14 |
| PRRX1   | Paired Related Homeobox 1                                          | 1.14 |
| OPHN1   | Oligophrenin 1                                                     | 1.14 |
| AADAC   | Arylacetamide Deacetylase                                          | 1.14 |
| MRPS22  | Mitochondrial Ribosomal Protein S22                                | 1.14 |
| PLEKHM1 | Pleckstrin Homology And RUN Domain Containing M1                   | 1.14 |
| TBX15   | T-Box Transcription Factor 15                                      | 1.14 |
| KLF15   | Kruppel Like Factor 15                                             | 1.14 |
| EBF1    | EBF Transcription Factor 1                                         | 1.14 |
| FAR2    | Fatty Acyl-CoA Reductase 2                                         | 1.14 |
| CHST15  | Carbohydrate Sulfotransferase 15                                   | 1.14 |
| RPLP1   | Ribosomal Protein Lateral Stalk Subunit P1                         | 1.14 |
| SUCNR1  | Succinate Receptor 1                                               | 1.14 |
| EXOC2   | Exocyst Complex Component 2                                        | 1.14 |
| AKAP1   | A-Kinase Anchoring Protein 1                                       | 1.14 |
| BHLHE41 | Basic Helix-Loop-Helix Family Member E41                           | 1.14 |
| CDK5R2  | Cyclin Dependent Kinase 5 Regulatory Subunit 2                     | 1.14 |
| MTX2    | Metaxin 2                                                          | 1.14 |
| CRTC3   | CREB Regulated Transcription Coactivator 3                         | 1.14 |
| NR2C1   | Nuclear Receptor Subfamily 2 Group C Member 1                      | 1.14 |
| LHPP    | Phospholysine Phosphohistidine Inorganic Pyrophosphate Phosphatase | 1.14 |
| KANSL1  | KAT8 Regulatory NSL Complex Subunit 1                              | 1.14 |
| USP37   | Ubiquitin Specific Peptidase 37                                    | 1.14 |

|           |                                                             |      |
|-----------|-------------------------------------------------------------|------|
| MEMO1     | Mediator Of Cell Motility 1                                 | 1.14 |
| CLIC6     | Chloride Intracellular Channel 6                            | 1.14 |
| EIF3E     | Eukaryotic Translation Initiation Factor 3 Subunit E        | 1.14 |
| OBSL1     | Obscurin Like Cytoskeletal Adaptor 1                        | 1.14 |
| GORAB     | Golgin, RAB6 Interacting                                    | 1.14 |
| ASB1      | Ankyrin Repeat And SOCS Box Containing 1                    | 1.14 |
| MKLN1     | Muskelin 1                                                  | 1.14 |
| DPY30     | Dpy-30 Histone Methyltransferase Complex Regulatory Subunit | 1.14 |
| KLF8      | Kruppel Like Factor 8                                       | 1.14 |
| SRRM1     | Serine And Arginine Repetitive Matrix 1                     | 1.14 |
| CASZ1     | Castor Zinc Finger 1                                        | 1.14 |
| GIN52     | GIN5 Complex Subunit 2                                      | 1.14 |
| HOXD3     | Homeobox D3                                                 | 1.14 |
| SERPINB12 | Serpin Family B Member 12                                   | 1.14 |
| ZRANB1    | Zinc Finger RANBP2-Type Containing 1                        | 1.14 |
| DMRTA2    | DMRT Like Family A2                                         | 1.14 |
| ZNF142    | Zinc Finger Protein 142                                     | 1.14 |
| FAM53B    | Family With Sequence Similarity 53 Member B                 | 1.14 |
| ANKZF1    | Ankyrin Repeat And Zinc Finger Peptidyl TRNA Hydrolase 1    | 1.14 |
| FOXD2     | Forkhead Box D2                                             | 1.14 |
| GSE1      | Gse1 Coiled-Coil Protein                                    | 1.14 |
| SPAG17    | Sperm Associated Antigen 17                                 | 1.14 |
| ZFAND2B   | Zinc Finger AN1-Type Containing 2B                          | 1.14 |
| CENPW     | Centromere Protein W                                        | 1.14 |
| HUS1B     | HUS1 Checkpoint Clamp Component B                           | 1.14 |
| SYF2      | SYF2 Pre-mRNA Splicing Factor                               | 1.14 |
| EMC2      | ER Membrane Protein Complex Subunit 2                       | 1.14 |
| OFCC1     | Orofacial Cleft 1 Candidate 1                               | 1.14 |
| TMEM74    | Transmembrane Protein 74                                    | 1.14 |
| RCCD1     | RCC1 Domain Containing 1                                    | 1.14 |
| CNPPD1    | Cyclin Pas1/PHO80 Domain Containing 1                       | 1.14 |
| ZXDA      | Zinc Finger X-Linked Duplicated A                           | 1.14 |
| LRMDA     | Leucine Rich Melanocyte Differentiation Associated          | 1.14 |
| C12orf71  | Chromosome 12 Open Reading Frame 71                         | 1.14 |
| RSRP1     | Arginine And Serine Rich Protein 1                          | 1.14 |
| FAM104B   | Family With Sequence Similarity 104 Member B                | 1.14 |
| FOXL2NB   | FOXL2 Neighbor                                              | 1.14 |
| EEF1AKMT2 | EEF1A Lysine Methyltransferase 2                            | 1.14 |
| PRR23C    | Proline Rich 23C                                            | 1.14 |
| CFAP299   | Cilia And Flagella Associated Protein 299                   | 1.14 |
| PRR23A    | Proline Rich 23A                                            | 1.14 |

|                 |                                                                       |      |
|-----------------|-----------------------------------------------------------------------|------|
| HULC            | Hepatocellular Carcinoma Up-Regulated Long Non-Coding RNA             | 1.14 |
| HOXD-AS2        | HOXD Cluster Antisense RNA 2                                          | 1.14 |
| LINC00593       | Long Intergenic Non-Protein Coding RNA 593                            | 1.14 |
| DRAIC           | Downregulated RNA In Cancer, Inhibitor Of Cell Invasion And Migration | 1.14 |
| PCAT29          | Prostate Cancer Associated Transcript 29                              | 1.14 |
| ALDH1L1-AS2     | ALDH1L1 Antisense RNA 2                                               | 1.14 |
| LINC01426       | Long Intergenic Non-Protein Coding RNA 1426                           | 1.14 |
| LINC00670       | Long Intergenic Non-Protein Coding RNA 670                            | 1.14 |
| FAM53B-AS1      | FAM53B Antisense RNA 1                                                | 1.14 |
| MIR4425         | MicroRNA 4425                                                         | 1.14 |
| AADACL2-AS1     | AADACL2 Antisense RNA 1                                               | 1.14 |
| MKLN1-AS        | MKLN1 Antisense RNA                                                   | 1.14 |
| MIR193BHG       | MIR193B Host Gene                                                     | 1.14 |
| LINC01812       | Long Intergenic Non-Protein Coding RNA 1812                           | 1.14 |
| LINC01247       | Long Intergenic Non-Protein Coding RNA 1247                           | 1.14 |
| GORAB-AS1       | GORAB Antisense RNA 1                                                 | 1.14 |
| EPS15P1         | Epidermal Growth Factor Receptor Pathway Substrate 15 Pseudogene 1    | 1.14 |
| ENSG00000229162 |                                                                       | 1.14 |
| ENSG00000231953 |                                                                       | 1.14 |
| ENSG00000256234 |                                                                       | 1.14 |
| ENSG00000257258 |                                                                       | 1.14 |
| ENSG00000258539 |                                                                       | 1.14 |
| ENSG00000253811 |                                                                       | 1.14 |
| ENSG00000253456 |                                                                       | 1.14 |
| ENSG00000270460 |                                                                       | 1.14 |
| ENSG00000205653 |                                                                       | 1.14 |
| RPL36AP43       | Ribosomal Protein L36a Pseudogene 43                                  | 1.14 |
| ENSG00000255750 |                                                                       | 1.14 |
| ENSG00000261025 |                                                                       | 1.14 |
| LINC02419       | Long Intergenic Non-Protein Coding RNA 2419                           | 1.14 |
| HAUS4P1         | HAUS Augmin Like Complex Subunit 4 Pseudogene 1                       | 1.14 |
| ENSG00000239941 |                                                                       | 1.14 |
| ENSG00000226992 |                                                                       | 1.14 |
| ENSG00000238034 |                                                                       | 1.14 |
| ENSG00000225718 |                                                                       | 1.14 |
| ENSG00000232072 |                                                                       | 1.14 |
| ENSG00000233689 |                                                                       | 1.14 |
| LOC105376204    | Uncharacterized LOC105376204                                          | 1.14 |
| ENSG00000230575 |                                                                       | 1.14 |
| ENSG00000255968 |                                                                       | 1.14 |

|                 |                                                |      |
|-----------------|------------------------------------------------|------|
| ENSG00000250934 |                                                | 1.14 |
| TDGP1           | Thymine-DNA Glycosylase Pseudogene 1           | 1.14 |
| RNU6-229P       | RNA, U6 Small Nuclear 229, Pseudogene          | 1.14 |
| LINC01824       | Long Intergenic Non-Protein Coding RNA 1824    | 1.14 |
| lnc-RNF145-3    |                                                | 1.14 |
| RNA5SP56        | RNA, 5S Ribosomal Pseudogene 56                | 1.14 |
| RNU6-187P       | RNA, U6 Small Nuclear 187, Pseudogene          | 1.14 |
| RNU6-832P       | RNA, U6 Small Nuclear 832, Pseudogene          | 1.14 |
| RNU6-394P       | RNA, U6 Small Nuclear 394, Pseudogene          | 1.14 |
| MYCLP2          | MYCL Pseudogene 2                              | 1.14 |
| ENSG00000200857 |                                                | 1.14 |
| LOC105373757    | Uncharacterized LOC105373757                   | 1.14 |
| PSMC1P12        | Proteasome 26S Subunit, ATPase 1 Pseudogene 12 | 1.14 |
| ENSG00000255451 |                                                | 1.14 |
| KRT8P17         | Keratin 8 Pseudogene 17                        | 1.14 |
| ENSG00000253949 |                                                | 1.14 |
| ENSG00000278095 |                                                | 1.14 |
| ENSG00000284999 |                                                | 1.14 |
| lnc-TLE3-15     |                                                | 1.14 |
| AY509916        |                                                | 1.14 |
| RF00017-6259    |                                                | 1.14 |
| piR-48389-002   |                                                | 1.14 |
| lnc-RUNX3-3     |                                                | 1.14 |
| ENSG00000286215 |                                                | 1.14 |
| ENSG00000285785 |                                                | 1.14 |
| ENSG00000286364 |                                                | 1.14 |
| ENSG00000286748 |                                                | 1.14 |
| lnc-RNF145-4    |                                                | 1.14 |
| ENSG00000286153 |                                                | 1.14 |
| lnc-SYF2-5      |                                                | 1.14 |
| lnc-FOXL2NB-8   |                                                | 1.14 |
| HSALNG0047286   |                                                | 1.14 |
| RNU6ATAC21<br>P | RNA, U6atac Small Nuclear 21, Pseudogene       | 1.14 |
| lnc-MEMO1-3     |                                                | 1.14 |
| piR-54649       |                                                | 1.14 |
| lnc-KLF15-3     |                                                | 1.14 |
| NOLC1P1         | NOLC1 Pseudogene 1                             | 1.14 |
| ENSG00000201075 |                                                | 1.14 |
| HSALNG0073494   |                                                | 1.14 |
| NONHSAG006279.2 |                                                | 1.14 |

|                 |                                                         |      |
|-----------------|---------------------------------------------------------|------|
| LOC105369705    | Uncharacterized LOC105369705                            | 1.14 |
| ENSG00000256625 |                                                         | 1.14 |
| ENSG00000279076 |                                                         | 1.14 |
| lnc-TLE3-16     |                                                         | 1.14 |
| ENSG00000285896 |                                                         | 1.14 |
| piR-39099-217   |                                                         | 1.14 |
| ENSG00000286466 |                                                         | 1.14 |
| lnc-RCAN1-5     |                                                         | 1.14 |
| lnc-ATG5-9      |                                                         | 1.14 |
| piR-58297-353   |                                                         | 1.14 |
| HSALNG0001769   |                                                         | 1.14 |
| piR-54420       |                                                         | 1.14 |
| ENSG00000237617 |                                                         | 1.14 |
| IFITM3P7        | IFITM3 Pseudogene 7                                     | 1.14 |
| LOC107984111    | Uncharacterized LOC107984111                            | 1.14 |
| piR-38352-105   |                                                         | 1.14 |
| ENSG00000279193 |                                                         | 1.14 |
| ENSG00000271355 |                                                         | 1.14 |
| RF00017-6262    |                                                         | 1.14 |
| FJ601684-005    |                                                         | 1.14 |
| piR-57195-017   |                                                         | 1.14 |
| ENSG00000286417 |                                                         | 1.14 |
| HSALNG0050307   |                                                         | 1.14 |
| LOC102724584    | Uncharacterized LOC102724584                            | 1.14 |
| LOC105373882    | Uncharacterized LOC105373882                            | 1.14 |
| ENSG00000235968 |                                                         | 1.14 |
| LOC105369704    | Uncharacterized LOC105369704                            | 1.14 |
| LOC107984788    | Uncharacterized LOC107984788                            | 1.14 |
| piR-47086-011   |                                                         | 1.14 |
| piR-50444-402   |                                                         | 1.14 |
| ENSG00000278687 |                                                         | 1.14 |
| ENSG00000226280 |                                                         | 1.14 |
| PRKCQ           | Protein Kinase C Theta                                  | 0.99 |
| RORA            | RAR Related Orphan Receptor A                           | 0.99 |
| CRHR1           | Corticotropin Releasing Hormone Receptor 1              | 0.99 |
| SLC17A5         | Solute Carrier Family 17 Member 5                       | 0.87 |
| TYMP            | Thymidine Phosphorylase                                 | 0.83 |
| ERBB3           | Erb-B2 Receptor Tyrosine Kinase 3                       | 0.8  |
| IDH2            | Isocitrate Dehydrogenase (NADP(+)) 2                    | 0.8  |
| ALDH2           | Aldehyde Dehydrogenase 2 Family Member                  | 0.8  |
| KCNMA1          | Potassium Calcium-Activated Channel Subfamily M Alpha 1 | 0.8  |



|          |                                                                       |     |
|----------|-----------------------------------------------------------------------|-----|
| CYP1B1   | Cytochrome P450 Family 1 Subfamily B Member 1                         | 0.8 |
| NMNAT1   | Nicotinamide Nucleotide Adenylyltransferase 1                         | 0.8 |
| CACNA1A  | Calcium Voltage-Gated Channel Subunit Alpha1 A                        | 0.8 |
| ATP2B3   | ATPase Plasma Membrane Ca <sup>2+</sup> Transporting 3                | 0.8 |
| MSN      | Moesin                                                                | 0.8 |
| CSNK2B   | Casein Kinase 2 Beta                                                  | 0.8 |
| POU5F1   | POU Class 5 Homeobox 1                                                | 0.8 |
| PAX3     | Paired Box 3                                                          | 0.8 |
| SCNN1A   | Sodium Channel Epithelial 1 Subunit Alpha                             | 0.8 |
| PLCB3    | Phospholipase C Beta 3                                                | 0.8 |
| TNFSF11  | TNF Superfamily Member 11                                             | 0.8 |
| PIK3CB   | Phosphatidylinositol-4,5-Bisphosphate 3-Kinase Catalytic Subunit Beta | 0.8 |
| TCF12    | Transcription Factor 12                                               | 0.8 |
| USP15    | Ubiquitin Specific Peptidase 15                                       | 0.8 |
| ATF1     | Activating Transcription Factor 1                                     | 0.8 |
| PRKAR1B  | Protein Kinase CAMP-Dependent Type I Regulatory Subunit Beta          | 0.8 |
| TCF4     | Transcription Factor 4                                                | 0.8 |
| SUCLA2   | Succinate-CoA Ligase ADP-Forming Subunit Beta                         | 0.8 |
| MCM3     | Minichromosome Maintenance Complex Component 3                        | 0.8 |
| BCL2L11  | BCL2 Like 11                                                          | 0.8 |
| CDKN2C   | Cyclin Dependent Kinase Inhibitor 2C                                  | 0.8 |
| CAST     | Calpastatin                                                           | 0.8 |
| GRM8     | Glutamate Metabotropic Receptor 8                                     | 0.8 |
| NDRG1    | N-Myc Downstream Regulated 1                                          | 0.8 |
| PSMB7    | Proteasome 20S Subunit Beta 7                                         | 0.8 |
| TNFRSF21 | TNF Receptor Superfamily Member 21                                    | 0.8 |
| VDAC1    | Voltage Dependent Anion Channel 1                                     | 0.8 |
| MASP2    | Mannan Binding Lectin Serine Peptidase 2                              | 0.8 |
| MAP3K14  | Mitogen-Activated Protein Kinase Kinase Kinase 14                     | 0.8 |
| FADS1    | Fatty Acid Desaturase 1                                               | 0.8 |
| FADS2    | Fatty Acid Desaturase 2                                               | 0.8 |
| FZD10    | Frizzled Class Receptor 10                                            | 0.8 |
| CYP2C18  | Cytochrome P450 Family 2 Subfamily C Member 18                        | 0.8 |
| CRADD    | CASP2 And RIPK1 Domain Containing Adaptor With Death Domain           | 0.8 |
| CHD4     | Chromodomain Helicase DNA Binding Protein 4                           | 0.8 |
| DYRK2    | Dual Specificity Tyrosine Phosphorylation Regulated Kinase 2          | 0.8 |
| NANS     | N-Acetylneuraminate Synthase                                          | 0.8 |
| PDGFA    | Platelet Derived Growth Factor Subunit A                              | 0.8 |
| PFKFB3   | 6-Phosphofructo-2-Kinase/Fructose-2,6-Biphosphatase 3                 | 0.8 |
| NLRC4    | NLR Family CARD Domain Containing 4                                   | 0.8 |

|         |                                                            |     |
|---------|------------------------------------------------------------|-----|
| SLC7A5  | Solute Carrier Family 7 Member 5                           | 0.8 |
| NSF     | N-Ethylmaleimide Sensitive Factor, Vesicle Fusing ATPase   | 0.8 |
| TMPRSS2 | Transmembrane Serine Protease 2                            | 0.8 |
| NDUFA12 | NADH:Ubiquinone Oxidoreductase Subunit A12                 | 0.8 |
| UBE2G2  | Ubiquitin Conjugating Enzyme E2 G2                         | 0.8 |
| VEGFB   | Vascular Endothelial Growth Factor B                       | 0.8 |
| VAMP1   | Vesicle Associated Membrane Protein 1                      | 0.8 |
| LITAF   | Lipopolysaccharide Induced TNF Factor                      | 0.8 |
| ATG7    | Autophagy Related 7                                        | 0.8 |
| CD82    | CD82 Molecule                                              | 0.8 |
| PRKAG3  | Protein Kinase AMP-Activated Non-Catalytic Subunit Gamma 3 | 0.8 |
| IQGAP1  | IQ Motif Containing GTPase Activating Protein 1            | 0.8 |
| ST3GAL1 | ST3 Beta-Galactoside Alpha-2,3-Sialyltransferase 1         | 0.8 |
| STK36   | Serine/Threonine Kinase 36                                 | 0.8 |
| DCPS    | Decapping Enzyme, Scavenger                                | 0.8 |
| EGR2    | Early Growth Response 2                                    | 0.8 |
| TFAP2C  | Transcription Factor AP-2 Gamma                            | 0.8 |
| VAPA    | VAMP Associated Protein A                                  | 0.8 |
| GSC     | Goosecoid Homeobox                                         | 0.8 |
| EED     | Embryonic Ectoderm Development                             | 0.8 |
| SP3     | Sp3 Transcription Factor                                   | 0.8 |
| RAB5B   | RAB5B, Member RAS Oncogene Family                          | 0.8 |
| GALNT14 | Polypeptide N-Acetylgalactosaminyltransferase 14           | 0.8 |
| CAMK1D  | Calcium/Calmodulin Dependent Protein Kinase ID             | 0.8 |
| ARHGEF9 | Cdc42 Guanine Nucleotide Exchange Factor 9                 | 0.8 |
| AP4B1   | Adaptor Related Protein Complex 4 Subunit Beta 1           | 0.8 |
| LPAR5   | Lysophosphatidic Acid Receptor 5                           | 0.8 |
| LTBR    | Lymphotoxin Beta Receptor                                  | 0.8 |
| BIRC6   | Baculoviral IAP Repeat Containing 6                        | 0.8 |
| HOXD13  | Homeobox D13                                               | 0.8 |
| CLIC4   | Chloride Intracellular Channel 4                           | 0.8 |
| HHAT    | Hedgehog Acyltransferase                                   | 0.8 |
| MSI2    | Musashi RNA Binding Protein 2                              | 0.8 |
| DGKH    | Diacylglycerol Kinase Eta                                  | 0.8 |
| IL15RA  | Interleukin 15 Receptor Subunit Alpha                      | 0.8 |
| PCBP1   | Poly(RC) Binding Protein 1                                 | 0.8 |
| S100A11 | S100 Calcium Binding Protein A11                           | 0.8 |
| ST3GAL4 | ST3 Beta-Galactoside Alpha-2,3-Sialyltransferase 4         | 0.8 |
| KIRREL3 | Kirre Like Nephrin Family Adhesion Molecule 3              | 0.8 |
| CIB1    | Calcium And Integrin Binding 1                             | 0.8 |
| MSH5    | MutS Homolog 5                                             | 0.8 |

|         |                                                             |     |
|---------|-------------------------------------------------------------|-----|
| TRIM27  | Tripartite Motif Containing 27                              | 0.8 |
| VPS33B  | VPS33B Late Endosome And Lysosome Associated                | 0.8 |
| HOXD10  | Homeobox D10                                                | 0.8 |
| HOXD9   | Homeobox D9                                                 | 0.8 |
| FOXL2   | Forkhead Box L2                                             | 0.8 |
| HIPK1   | Homeodomain Interacting Protein Kinase 1                    | 0.8 |
| SPAST   | Spastin                                                     | 0.8 |
| NCAPD2  | Non-SMC Condensin I Complex Subunit D2                      | 0.8 |
| POLA2   | DNA Polymerase Alpha 2, Accessory Subunit                   | 0.8 |
| NUBP1   | Nucleotide Binding Protein 1                                | 0.8 |
| PHB2    | Prohibitin 2                                                | 0.8 |
| PHLPP1  | PH Domain And Leucine Rich Repeat Protein Phosphatase 1     | 0.8 |
| SYVN1   | Synoviolin 1                                                | 0.8 |
| SUPT3H  | SPT3 Homolog, SAGA And STAGA Complex Component              | 0.8 |
| DNAH5   | Dynein Axonemal Heavy Chain 5                               | 0.8 |
| DHX16   | DEAH-Box Helicase 16                                        | 0.8 |
| CCDC6   | Coiled-Coil Domain Containing 6                             | 0.8 |
| MAN1C1  | Mannosidase Alpha Class 1C Member 1                         | 0.8 |
| FAIM    | Fas Apoptotic Inhibitory Molecule                           | 0.8 |
| FAU     | FAU Ubiquitin Like And Ribosomal Protein S30 Fusion         | 0.8 |
| ABCF1   | ATP Binding Cassette Subfamily F Member 1                   | 0.8 |
| HOXD8   | Homeobox D8                                                 | 0.8 |
| HAS1    | Hyaluronan Synthase 1                                       | 0.8 |
| DIP2B   | Disco Interacting Protein 2 Homolog B                       | 0.8 |
| DDX39B  | DExH-Box Helicase 39B                                       | 0.8 |
| CXXC4   | CXXC Finger Protein 4                                       | 0.8 |
| ELAVL4  | ELAV Like RNA Binding Protein 4                             | 0.8 |
| PBX2    | PBX Homeobox 2                                              | 0.8 |
| PRC1    | Protein Regulator Of Cytokinesis 1                          | 0.8 |
| RRAGB   | Ras Related GTP Binding B                                   | 0.8 |
| PLXNC1  | Plexin C1                                                   | 0.8 |
| SLC52A3 | Solute Carrier Family 52 Member 3                           | 0.8 |
| SLC16A9 | Solute Carrier Family 16 Member 9                           | 0.8 |
| SEMA4B  | Semaphorin 4B                                               | 0.8 |
| ILKAP   | ILK Associated Serine/Threonine Phosphatase                 | 0.8 |
| SRSF7   | Serine And Arginine Rich Splicing Factor 7                  | 0.8 |
| ULBP2   | UL16 Binding Protein 2                                      | 0.8 |
| KLHL20  | Kelch Like Family Member 20                                 | 0.8 |
| LGR4    | Leucine Rich Repeat Containing G Protein-Coupled Receptor 4 | 0.8 |
| MYO10   | Myosin X                                                    | 0.8 |
| CD180   | CD180 Molecule                                              | 0.8 |

|          |                                                          |     |
|----------|----------------------------------------------------------|-----|
| PRDM6    | PR/SET Domain 6                                          | 0.8 |
| VIL1     | Villin 1                                                 | 0.8 |
| CCHCR1   | Coiled-Coil Alpha-Helical Rod Protein 1                  | 0.8 |
| ARHGAP21 | Rho GTPase Activating Protein 21                         | 0.8 |
| FEZ1     | Fasciculation And Elongation Protein Zeta 1              | 0.8 |
| COX7C    | Cytochrome C Oxidase Subunit 7C                          | 0.8 |
| HEXIM1   | HEXIM P-TEFb Complex Subunit 1                           | 0.8 |
| GRHL3    | Grainyhead Like Transcription Factor 3                   | 0.8 |
| SF1      | Splicing Factor 1                                        | 0.8 |
| PPP1R10  | Protein Phosphatase 1 Regulatory Subunit 10              | 0.8 |
| RSPO3    | R-Spondin 3                                              | 0.8 |
| TNFSF18  | TNF Superfamily Member 18                                | 0.8 |
| TNS3     | Tensin 3                                                 | 0.8 |
| SCYL3    | SCY1 Like Pseudokinase 3                                 | 0.8 |
| FRMD4A   | FERM Domain Containing 4A                                | 0.8 |
| C1D      | C1D Nuclear Receptor Corepressor                         | 0.8 |
| FAAH2    | Fatty Acid Amide Hydrolase 2                             | 0.8 |
| BANP     | BTG3 Associated Nuclear Protein                          | 0.8 |
| ESPN     | Espin                                                    | 0.8 |
| ANP32B   | Acidic Nuclear Phosphoprotein 32 Family Member B         | 0.8 |
| LPIN3    | Lipin 3                                                  | 0.8 |
| FAM136A  | Family With Sequence Similarity 136 Member A             | 0.8 |
| ATF6B    | Activating Transcription Factor 6 Beta                   | 0.8 |
| LRRC32   | Leucine Rich Repeat Containing 32                        | 0.8 |
| ADO      | 2-Aminoethanethiol Dioxygenase                           | 0.8 |
| AKAP11   | A-Kinase Anchoring Protein 11                            | 0.8 |
| ACBD4    | Acyl-CoA Binding Domain Containing 4                     | 0.8 |
| FMNL1    | Formin Like 1                                            | 0.8 |
| HOXD11   | Homeobox D11                                             | 0.8 |
| CEBPZ    | CCAAT Enhancer Binding Protein Zeta                      | 0.8 |
| CNTN3    | Contactin 3                                              | 0.8 |
| CHD6     | Chromodomain Helicase DNA Binding Protein 6              | 0.8 |
| RNF25    | Ring Finger Protein 25                                   | 0.8 |
| CSMD1    | CUB And Sushi Multiple Domains 1                         | 0.8 |
| EHD3     | EH Domain Containing 3                                   | 0.8 |
| PCYOX1   | Prenylcysteine Oxidase 1                                 | 0.8 |
| PLEKHH2  | Pleckstrin Homology, MyTH4 And FERM Domain Containing H2 | 0.8 |
| SOX13    | SRY-Box Transcription Factor 13                          | 0.8 |
| SNRPG    | Small Nuclear Ribonucleoprotein Polypeptide G            | 0.8 |
| NFKBIL1  | NFKB Inhibitor Like 1                                    | 0.8 |
| OLFML3   | Olfactomedin Like 3                                      | 0.8 |

|          |                                                          |     |
|----------|----------------------------------------------------------|-----|
| LCLAT1   | Lysocardiolipin Acyltransferase 1                        | 0.8 |
| LAG3     | Lymphocyte Activating 3                                  | 0.8 |
| TRMT11   | TRNA Methyltransferase 11 Homolog                        | 0.8 |
| LIN7C    | Lin-7 Homolog C, Crumbs Cell Polarity Complex Component  | 0.8 |
| SYT14    | Synaptotagmin 14                                         | 0.8 |
| RCAN3    | RCAN Family Member 3                                     | 0.8 |
| KATNAL1  | Katanin Catalytic Subunit A1 Like 1                      | 0.8 |
| PRSS23   | Serine Protease 23                                       | 0.8 |
| ZC4H2    | Zinc Finger C4H2-Type Containing                         | 0.8 |
| ZNF365   | Zinc Finger Protein 365                                  | 0.8 |
| CCDC68   | Coiled-Coil Domain Containing 68                         | 0.8 |
| FBXO31   | F-Box Protein 31                                         | 0.8 |
| LPCAT3   | Lysophosphatidylcholine Acyltransferase 3                | 0.8 |
| ARHGAP27 | Rho GTPase Activating Protein 27                         | 0.8 |
| ERGIC2   | ERGIC And Golgi 2                                        | 0.8 |
| ADGRF5   | Adhesion G Protein-Coupled Receptor F5                   | 0.8 |
| CRISPLD2 | Cysteine Rich Secretory Protein LCCL Domain Containing 2 | 0.8 |
| HOXD1    | Homeobox D1                                              | 0.8 |
| CEP70    | Centrosomal Protein 70                                   | 0.8 |
| CORT     | Cortistatin                                              | 0.8 |
| HEXIM2   | HEXIM P-TEFb Complex Subunit 2                           | 0.8 |
| DHX57    | DExH-Box Helicase 57                                     | 0.8 |
| MRPS30   | Mitochondrial Ribosomal Protein S30                      | 0.8 |
| DNAAF5   | Dynein Axonemal Assembly Factor 5                        | 0.8 |
| NAALADL1 | N-Acetylated Alpha-Linked Acidic Dipeptidase Like 1      | 0.8 |
| NAPG     | NSF Attachment Protein Gamma                             | 0.8 |
| CDC42EP4 | CDC42 Effector Protein 4                                 | 0.8 |
| RNF11    | Ring Finger Protein 11                                   | 0.8 |
| CREBZF   | CREB/ATF BZIP Transcription Factor                       | 0.8 |
| IGSF10   | Immunoglobulin Superfamily Member 10                     | 0.8 |
| NOP2     | NOP2 Nucleolar Protein                                   | 0.8 |
| SDK1     | Sidekick Cell Adhesion Molecule 1                        | 0.8 |
| RPUSD4   | RNA Pseudouridine Synthase D4                            | 0.8 |
| SLC35B3  | Solute Carrier Family 35 Member B3                       | 0.8 |
| SPSB2    | Sp1A/Ryanodine Receptor Domain And SOCS Box Containing 2 | 0.8 |
| TREX2    | Three Prime Repair Exonuclease 2                         | 0.8 |
| UBL3     | Ubiquitin Like 3                                         | 0.8 |
| UBLCP1   | Ubiquitin Like Domain Containing CTD Phosphatase 1       | 0.8 |
| TRMT112  | TRNA Methyltransferase Subunit 11-2                      | 0.8 |
| LHX2     | LIM Homeobox 2                                           | 0.8 |
| STARD8   | StAR Related Lipid Transfer Domain Containing 8          | 0.8 |

|          |                                                                      |     |
|----------|----------------------------------------------------------------------|-----|
| TCF19    | Transcription Factor 19                                              | 0.8 |
| RBP7     | Retinol Binding Protein 7                                            | 0.8 |
| TMEM132D | Transmembrane Protein 132D                                           | 0.8 |
| ING4     | Inhibitor Of Growth Family Member 4                                  | 0.8 |
| LAX1     | Lymphocyte Transmembrane Adaptor 1                                   | 0.8 |
| PAQR8    | Progesterone And AdipoQ Receptor Family Member 8                     | 0.8 |
| KIF18A   | Kinesin Family Member 18A                                            | 0.8 |
| ZC3H11A  | Zinc Finger CCCH-Type Containing 11A                                 | 0.8 |
| ZDHHC7   | Zinc Finger DHHC-Type Palmitoyltransferase 7                         | 0.8 |
| ZNF384   | Zinc Finger Protein 384                                              | 0.8 |
| VGLL4    | Vestigial Like Family Member 4                                       | 0.8 |
| ZBTB38   | Zinc Finger And BTB Domain Containing 38                             | 0.8 |
| VSIG4    | V-Set And Immunoglobulin Domain Containing 4                         | 0.8 |
| GNL3L    | G Protein Nucleolar 3 Like                                           | 0.8 |
| CCDC91   | Coiled-Coil Domain Containing 91                                     | 0.8 |
| ATG2A    | Autophagy Related 2A                                                 | 0.8 |
| FEV      | FEV Transcription Factor, ETS Family Member                          | 0.8 |
| MAGI3    | Membrane Associated Guanylate Kinase, WW And PDZ Domain Containing 3 | 0.8 |
| BBX      | BBX High Mobility Group Box Domain Containing                        | 0.8 |
| GADL1    | Glutamate Decarboxylase Like 1                                       | 0.8 |
| HOXD12   | Homeobox D12                                                         | 0.8 |
| HOXD4    | Homeobox D4                                                          | 0.8 |
| HEMGN    | Hemogen                                                              | 0.8 |
| DHRS7B   | Dehydrogenase/Reductase 7B                                           | 0.8 |
| RNF145   | Ring Finger Protein 145                                              | 0.8 |
| PLEKHG6  | Pleckstrin Homology And RhoGEF Domain Containing G6                  | 0.8 |
| PHTF1    | Putative Homeodomain Transcription Factor 1                          | 0.8 |
| TRAF3IP3 | TRAF3 Interacting Protein 3                                          | 0.8 |
| TPRG1    | Tumor Protein P63 Regulated 1                                        | 0.8 |
| TAPBP    | TAP Binding Protein Like                                             | 0.8 |
| LBH      | LBH Regulator Of WNT Signaling Pathway                               | 0.8 |
| ZHX3     | Zinc Fingers And Homeoboxes 3                                        | 0.8 |
| ESPNL    | Espin Like                                                           | 0.8 |
| ACRBP    | Acrosin Binding Protein                                              | 0.8 |
| MYRF     | Myelin Regulatory Factor                                             | 0.8 |
| IL26     | Interleukin 26                                                       | 0.8 |
| PRM2     | Protamine 2                                                          | 0.8 |
| UNC45A   | Unc-45 Myosin Chaperone A                                            | 0.8 |
| KIAA0513 | KIAA0513                                                             | 0.8 |
| TCHHL1   | Trichohyalin Like 1                                                  | 0.8 |

|          |                                                       |     |
|----------|-------------------------------------------------------|-----|
| TMCC3    | Transmembrane And Coiled-Coil Domain Family 3         | 0.8 |
| YIPF4    | Yip1 Domain Family Member 4                           | 0.8 |
| YIPF6    | Yip1 Domain Family Member 6                           | 0.8 |
| GET4     | Guided Entry Of Tail-Anchored Proteins Factor 4       | 0.8 |
| CAPN14   | Calpain 14                                            | 0.8 |
| EVX2     | Even-Skipped Homeobox 2                               | 0.8 |
| FAM118B  | Family With Sequence Similarity 118 Member B          | 0.8 |
| BCL2L15  | BCL2 Like 15                                          | 0.8 |
| METTL18  | Methyltransferase Like 18                             | 0.8 |
| ACOXL    | Acyl-CoA Oxidase Like                                 | 0.8 |
| AADACL2  | Arylacetamide Deacetylase Like 2                      | 0.8 |
| C5orf15  | Chromosome 5 Open Reading Frame 15                    | 0.8 |
| C2orf42  | Chromosome 2 Open Reading Frame 42                    | 0.8 |
| C17orf80 | Chromosome 17 Open Reading Frame 80                   | 0.8 |
| PRRC2C   | Proline Rich Coiled-Coil 2C                           | 0.8 |
| IER2     | Immediate Early Response 2                            | 0.8 |
| IFFO1    | Intermediate Filament Family Orphan 1                 | 0.8 |
| RSBN1    | Round Spermatid Basic Protein 1                       | 0.8 |
| NGRN     | Neugrin, Neurite Outgrowth Associated                 | 0.8 |
| NIPAL3   | NIPA Like Domain Containing 3                         | 0.8 |
| PSMG2    | Proteasome Assembly Chaperone 2                       | 0.8 |
| TNP2     | Transition Protein 2                                  | 0.8 |
| TTLL11   | Tubulin Tyrosine Ligase Like 11                       | 0.8 |
| TTLL4    | Tubulin Tyrosine Ligase Like 4                        | 0.8 |
| KLHL36   | Kelch Like Family Member 36                           | 0.8 |
| ZFPL1    | Zinc Finger Protein Like 1                            | 0.8 |
| ZCCHC14  | Zinc Finger CCHC-Type Containing 14                   | 0.8 |
| ZNF311   | Zinc Finger Protein 311                               | 0.8 |
| ETAA1    | ETAA1 Activator Of ATR Kinase                         | 0.8 |
| FAM104A  | Family With Sequence Similarity 104 Member A          | 0.8 |
| FAM110A  | Family With Sequence Similarity 110 Member A          | 0.8 |
| ADGRF1   | Adhesion G Protein-Coupled Receptor F1                | 0.8 |
| C1orf112 | Chromosome 1 Open Reading Frame 112                   | 0.8 |
| RMDN2    | Regulator Of Microtubule Dynamics 2                   | 0.8 |
| HEATR5B  | HEAT Repeat Containing 5B                             | 0.8 |
| HINT3    | Histidine Triad Nucleotide Binding Protein 3          | 0.8 |
| HAUS7    | HAUS Augmin Like Complex Subunit 7                    | 0.8 |
| EMC8     | ER Membrane Protein Complex Subunit 8                 | 0.8 |
| NRM      | Nurim                                                 | 0.8 |
| SELENON  | Selenoprotein N                                       | 0.8 |
| ICE2     | Interactor Of Little Elongation Complex ELL Subunit 2 | 0.8 |

|          |                                                                                 |     |
|----------|---------------------------------------------------------------------------------|-----|
| OR2J2    | Olfactory Receptor Family 2 Subfamily J Member 2                                | 0.8 |
| OR2J3    | Olfactory Receptor Family 2 Subfamily J Member 3                                | 0.8 |
| OR2B3    | Olfactory Receptor Family 2 Subfamily B Member 3                                | 0.8 |
| TTC27    | Tetratricopeptide Repeat Domain 27                                              | 0.8 |
| TBC1D12  | TBC1 Domain Family Member 12                                                    | 0.8 |
| UTP23    | UTP23 Small Subunit Processome Component                                        | 0.8 |
| USPL1    | Ubiquitin Specific Peptidase Like 1                                             | 0.8 |
| GALNT17  | Polypeptide N-Acetylgalactosaminyltransferase 17                                | 0.8 |
| FAM9B    | Family With Sequence Similarity 9 Member B                                      | 0.8 |
| CPSF4L   | Cleavage And Polyadenylation Specific Factor 4 Like                             | 0.8 |
| CITED4   | Cbp/P300 Interacting Transactivator With Glu/Asp Rich Carboxy-Terminal Domain 4 | 0.8 |
| EFCAB5   | EF-Hand Calcium Binding Domain 5                                                | 0.8 |
| CCDC34   | Coiled-Coil Domain Containing 34                                                | 0.8 |
| EMILIN3  | Elastin Microfibril Interfacer 3                                                | 0.8 |
| SPIN3    | Spindlin Family Member 3                                                        | 0.8 |
| SERTAD4  | SERTA Domain Containing 4                                                       | 0.8 |
| EMSY     | EMSY Transcriptional Repressor, BRCA2 Interacting                               | 0.8 |
| POLR1H   | RNA Polymerase I Subunit H                                                      | 0.8 |
| PSORS1C2 | Psoriasis Susceptibility 1 Candidate 2                                          | 0.8 |
| STPG1    | Sperm Tail PG-Rich Repeat Containing 1                                          | 0.8 |
| TMEM258  | Transmembrane Protein 258                                                       | 0.8 |
| TMEM26   | Transmembrane Protein 26                                                        | 0.8 |
| ZC3H12B  | Zinc Finger CCCH-Type Containing 12B                                            | 0.8 |
| METTL11B | Methyltransferase Like 11B                                                      | 0.8 |
| FAM9A    | Family With Sequence Similarity 9 Member A                                      | 0.8 |
| CNOT9    | CCR4-NOT Transcription Complex Subunit 9                                        | 0.8 |
| NCMAP    | Non-Compact Myelin Associated Protein                                           | 0.8 |
| ITIH6    | Inter-Alpha-Trypsin Inhibitor Heavy Chain Family Member 6                       | 0.8 |
| STH      | Saitohin                                                                        | 0.8 |
| C6orf47  | Chromosome 6 Open Reading Frame 47                                              | 0.8 |
| GDPGP1   | GDP-D-Glucose Phosphorylase 1                                                   | 0.8 |
| CCDC81   | Coiled-Coil Domain Containing 81                                                | 0.8 |
| ARL17A   | ADP Ribosylation Factor Like GTPase 17A                                         | 0.8 |
| LY6G5B   | Lymphocyte Antigen 6 Family Member G5B                                          | 0.8 |
| LRRC37A2 | Leucine Rich Repeat Containing 37 Member A2                                     | 0.8 |
| HCP5     | HLA Complex P5                                                                  | 0.8 |
| DEXI     | Dexi Homolog                                                                    | 0.8 |
| MRTFB    | Myocardin Related Transcription Factor B                                        | 0.8 |
| PAGE2B   | PAGE Family Member 2B                                                           | 0.8 |
| PAGE5    | PAGE Family Member 5                                                            | 0.8 |



|             |                                                           |     |
|-------------|-----------------------------------------------------------|-----|
| PRM3        | Protamine 3                                               | 0.8 |
| ZNF774      | Zinc Finger Protein 774                                   | 0.8 |
| MEDAG       | Mesenteric Estrogen Dependent Adipogenesis                | 0.8 |
| ABRAXAS2    | Abraxas 2, BRISC Complex Subunit                          | 0.8 |
| TAFA2       | TAFA Chemokine Like Family Member 2                       | 0.8 |
| TRMO        | TRNA Methyltransferase O                                  | 0.8 |
| ZFP92       | ZFP92 Zinc Finger Protein                                 | 0.8 |
| ARL17B      | ADP Ribosylation Factor Like GTPase 17B                   | 0.8 |
| C1orf74     | Chromosome 1 Open Reading Frame 74                        | 0.8 |
| SFTA2       | Surfactant Associated 2                                   | 0.8 |
| PAGE3       | PAGE Family Member 3                                      | 0.8 |
| PHETA1      | PH Domain Containing Endocytic Trafficking Adaptor 1      | 0.8 |
| KRTAP10-1   | Keratin Associated Protein 10-1                           | 0.8 |
| ZBED6       | Zinc Finger BED-Type Containing 6                         | 0.8 |
| MEAK7       | MTOR Associated Protein, Eak-7 Homolog                    | 0.8 |
| PRR23B      | Proline Rich 23B                                          | 0.8 |
| SPATA32     | Spermatogenesis Associated 32                             | 0.8 |
| HLA-H       | Major Histocompatibility Complex, Class I, H (Pseudogene) | 0.8 |
| GRAMD2B     | GRAM Domain Containing 2B                                 | 0.8 |
| KRTAP10-2   | Keratin Associated Protein 10-2                           | 0.8 |
| UTP25       | UTP25 Small Subunit Processor Component                   | 0.8 |
| C1orf185    | Chromosome 1 Open Reading Frame 185                       | 0.8 |
| MUC22       | Mucin 22                                                  | 0.8 |
| TTLL13P     | Tubulin Tyrosine Ligase Like 13, Pseudogene               | 0.8 |
| HCG27       | HLA Complex Group 27                                      | 0.8 |
| HCG9        | HLA Complex Group 9                                       | 0.8 |
| PSORS1C3    | Psoriasis Susceptibility 1 Candidate 3                    | 0.8 |
| CENPS-CORT  | CENPS-CORT Readthrough                                    | 0.8 |
| HCG22       | HLA Complex Group 22                                      | 0.8 |
| LINC00311   | Long Intergenic Non-Protein Coding RNA 311                | 0.8 |
| CYP1B1-AS1  | CYP1B1 Antisense RNA 1                                    | 0.8 |
| SCARNA12    | Small Cajal Body-Specific RNA 12                          | 0.8 |
| SERTAD4-AS1 | SERTAD4 Antisense RNA 1                                   | 0.8 |
| LINC00303   | Long Intergenic Non-Protein Coding RNA 303                | 0.8 |
| TSPEAR-AS2  | TSPEAR Antisense RNA 2                                    | 0.8 |
| MTRNR2L10   | MT-RNR2 Like 10                                           | 0.8 |
| MIR4435-2HG | MIR4435-2 Host Gene                                       | 0.8 |
| LINC00322   | Long Intergenic Non-Protein Coding RNA 322                | 0.8 |
| GVQW3       | GVQW Motif Containing 3                                   | 0.8 |
| IFNG-AS1    | IFNG Antisense RNA 1                                      | 0.8 |
| SCARNA11    | Small Cajal Body-Specific RNA 11                          | 0.8 |

|             |                                                         |     |
|-------------|---------------------------------------------------------|-----|
| TEX41       | Testis Expressed 41                                     | 0.8 |
| LINC01553   | Long Intergenic Non-Protein Coding RNA 1553             | 0.8 |
| ZFH4-AS1    | ZFH4 Antisense RNA 1                                    | 0.8 |
| FGF10-AS1   | FGF10 Antisense RNA 1                                   | 0.8 |
| MTLN        | Mitoregulin                                             | 0.8 |
| MIR558      | MicroRNA 558                                            | 0.8 |
| MIR603      | MicroRNA 603                                            | 0.8 |
| HCG4B       | HLA Complex Group 4B                                    | 0.8 |
| CD27-AS1    | CD27 Antisense RNA 1                                    | 0.8 |
| LINC00111   | Long Intergenic Non-Protein Coding RNA 111              | 0.8 |
| ZNRD1ASP    | Zinc Ribbon Domain Containing 1 Antisense, Pseudogene   | 0.8 |
| LINC01550   | Long Intergenic Non-Protein Coding RNA 1550             | 0.8 |
| ADAM1A      | ADAM Metallopeptidase Domain 1A (Pseudogene)            | 0.8 |
| C1RL-AS1    | C1RL Antisense RNA 1                                    | 0.8 |
| RORA-AS1    | RORA Antisense RNA 1                                    | 0.8 |
| PTCSC2      | Papillary Thyroid Carcinoma Susceptibility Candidate 2  | 0.8 |
| TSPEAR-AS1  | TSPEAR Antisense RNA 1                                  | 0.8 |
| LINC01494   | Long Intergenic Non-Protein Coding RNA 1494             | 0.8 |
| ACOXL-AS1   | ACOXL Antisense RNA 1                                   | 0.8 |
| CT66        | Cancer/Testis Associated Transcript 66                  | 0.8 |
| RMDN2-AS1   | RMDN2 Antisense RNA 1                                   | 0.8 |
| MIR4478     | MicroRNA 4478                                           | 0.8 |
| IFITM4P     | Interferon Induced Transmembrane Protein 4 Pseudogene   | 0.8 |
| LINC01117   | Long Intergenic Non-Protein Coding RNA 1117             | 0.8 |
| LINC01107   | Long Intergenic Non-Protein Coding RNA 1107             | 0.8 |
| LINC01424   | Long Intergenic Non-Protein Coding RNA 1424             | 0.8 |
| LINC01563   | Long Intergenic Non-Protein Coding RNA 1563             | 0.8 |
| LINC00845   | Long Intergenic Non-Protein Coding RNA 845              | 0.8 |
| TCF4-AS1    | TCF4 Antisense RNA 1                                    | 0.8 |
| LINC01623   | Long Intergenic Non-Protein Coding RNA 1623             | 0.8 |
| LINC02610   | Long Intergenic Non-Protein Coding RNA 2610             | 0.8 |
| MICD        | MHC Class I Polypeptide-Related Sequence D (Pseudogene) | 0.8 |
| MIR4432HG   | MIR4432 Host Gene                                       | 0.8 |
| MIR4765     | MicroRNA 4765                                           | 0.8 |
| SLC44A3-AS1 | SLC44A3 Antisense RNA 1                                 | 0.8 |
| LINC00384   | Long Intergenic Non-Protein Coding RNA 384              | 0.8 |
| MIR4421     | MicroRNA 4421                                           | 0.8 |
| TH2LCRR     | T Helper Type 2 Locus Control Region Associated RNA     | 0.8 |
| LINC02202   | Long Intergenic Non-Protein Coding RNA 2202             | 0.8 |
| LINC01936   | Long Intergenic Non-Protein Coding RNA 1936             | 0.8 |
| LINC01940   | Long Intergenic Non-Protein Coding RNA 1940             | 0.8 |

|                 |                                                          |     |
|-----------------|----------------------------------------------------------|-----|
| LINC01427       | Long Intergenic Non-Protein Coding RNA 1427              | 0.8 |
| WARS2-AS1       | WARS2 Antisense RNA 1                                    | 0.8 |
| ATP2C2-AS1      | ATP2C2 Antisense RNA 1                                   | 0.8 |
| ETF1P1          | Eukaryotic Translation Termination Factor 1 Pseudogene 1 | 0.8 |
| LOC100129603    | Uncharacterized LOC100129603                             | 0.8 |
| LOC100131107    | Putative UPF0607 Protein ENSP00000383783                 | 0.8 |
| CCDC37-DT       | CCDC37 Divergent Transcript                              | 0.8 |
| ENSG00000229618 |                                                          | 0.8 |
| ENSG00000248752 |                                                          | 0.8 |
| MIR6891         | MicroRNA 6891                                            | 0.8 |
| LINC01995       | Long Intergenic Non-Protein Coding RNA 1995              | 0.8 |
| LINC02016       | Long Intergenic Non-Protein Coding RNA 2016              | 0.8 |
| LGR4-AS1        | LGR4 Antisense RNA 1                                     | 0.8 |
| LINC02341       | Long Intergenic Non-Protein Coding RNA 2341              | 0.8 |
| LINC02421       | Long Intergenic Non-Protein Coding RNA 2421              | 0.8 |
| LINC02612       | Long Intergenic Non-Protein Coding RNA 2612              | 0.8 |
| FABP3P2         | Fatty Acid Binding Protein 3 Pseudogene 2                | 0.8 |
| CYCSP38         | CYCS Pseudogene 38                                       | 0.8 |
| HRAT92          | Heart Tissue-Associated Transcript 92                    | 0.8 |
| FOXL3           | Forkhead Box L3                                          | 0.8 |
| MIR548AP        | MicroRNA 548ap                                           | 0.8 |
| HNRNPCP4        | Heterogeneous Nuclear Ribonucleoprotein C Pseudogene 4   | 0.8 |
| HDAC9-AS1       | HDAC9 Antisense RNA 1                                    | 0.8 |
| LOC100287387    | Uncharacterized LOC100287387                             | 0.8 |
| RN7SL333P       | RNA, 7SL, Cytoplasmic 333, Pseudogene                    | 0.8 |
| ENSG00000236935 |                                                          | 0.8 |
| PRKAR1B-AS2     | PRKAR1B Antisense RNA 2                                  | 0.8 |
| RPSAP4          | Ribosomal Protein SA Pseudogene 4                        | 0.8 |
| ENSG00000224228 |                                                          | 0.8 |
| RPL3P2          | Ribosomal Protein L3 Pseudogene 2                        | 0.8 |
| ENSG00000231424 |                                                          | 0.8 |
| ENSG00000231128 |                                                          | 0.8 |
| ENSG00000234471 |                                                          | 0.8 |
| ENSG00000234810 |                                                          | 0.8 |
| ENSG00000234921 |                                                          | 0.8 |
| ENSG00000226622 |                                                          | 0.8 |
| ENSG00000256967 |                                                          | 0.8 |
| ENSG00000258035 |                                                          | 0.8 |
| ENSG00000257449 |                                                          | 0.8 |
| ENSG00000258365 |                                                          | 0.8 |
| LINC00385       | Long Intergenic Non-Protein Coding RNA 385               | 0.8 |

|                 |                                                        |     |
|-----------------|--------------------------------------------------------|-----|
| ENSG00000248975 |                                                        | 0.8 |
| STK19B          | Serine/Threonine Kinase 19B (Pseudogene)               | 0.8 |
| ENSG00000255317 |                                                        | 0.8 |
| ENSG00000255062 |                                                        | 0.8 |
| PCSEAT          | Prostate Cancer Expressed EZH2 Associated Transcript   | 0.8 |
| ENSG00000226375 |                                                        | 0.8 |
| ENSG00000259704 |                                                        | 0.8 |
| ENSG00000271716 |                                                        | 0.8 |
| ENSG00000271989 |                                                        | 0.8 |
| ENSG00000272501 |                                                        | 0.8 |
| ENSG00000260302 |                                                        | 0.8 |
| LINC01681       | Long Intergenic Non-Protein Coding RNA 1681            | 0.8 |
| ENSG00000259212 |                                                        | 0.8 |
| ENSG00000259274 |                                                        | 0.8 |
| LINC02224       | Long Intergenic Non-Protein Coding RNA 2224            | 0.8 |
| GOT2P2          | GOT2 Pseudogene 2                                      | 0.8 |
| ALDH7A1P4       | Aldehyde Dehydrogenase 7 Family Member A1 Pseudogene 4 | 0.8 |
| MIR4536-2       | MicroRNA 4536-2                                        | 0.8 |
| RNU6-474P       | RNA, U6 Small Nuclear 474, Pseudogene                  | 0.8 |
| RNU1-103P       | RNA, U1 Small Nuclear 103, Pseudogene                  | 0.8 |
| RN7SL381P       | RNA, 7SL, Cytoplasmic 381, Pseudogene                  | 0.8 |
| RN7SL391P       | RNA, 7SL, Cytoplasmic 391, Pseudogene                  | 0.8 |
| ENSG00000236501 |                                                        | 0.8 |
| ENSG00000237311 |                                                        | 0.8 |
| ENSG00000238280 |                                                        | 0.8 |
| ENSG00000217455 |                                                        | 0.8 |
| ENSG00000213994 |                                                        | 0.8 |
| SHC1P1          | SHC Adaptor Protein 1 Pseudogene 1                     | 0.8 |
| ENSG00000231760 |                                                        | 0.8 |
| ENSG00000232080 |                                                        | 0.8 |
| ENSG00000212228 |                                                        | 0.8 |
| ENSG00000247121 |                                                        | 0.8 |
| ENSG00000248373 |                                                        | 0.8 |
| ENSG00000255966 |                                                        | 0.8 |
| ENSG00000254694 |                                                        | 0.8 |
| ENSG00000250421 |                                                        | 0.8 |
| ENSG00000249492 |                                                        | 0.8 |
| ENSG00000255389 |                                                        | 0.8 |
| ENSG00000255135 |                                                        | 0.8 |
| ENSG00000254810 |                                                        | 0.8 |
| MTCO3P1         | MT-CO3 Pseudogene 1                                    | 0.8 |

|                 |                                                                    |     |
|-----------------|--------------------------------------------------------------------|-----|
| ENSG00000228334 |                                                                    | 0.8 |
| ENSG00000226849 |                                                                    | 0.8 |
| ENSG00000236304 |                                                                    | 0.8 |
| ENSG00000277726 |                                                                    | 0.8 |
| ENSG00000270184 |                                                                    | 0.8 |
| ENSG00000260859 |                                                                    | 0.8 |
| ENSG00000263033 |                                                                    | 0.8 |
| ENSG00000263307 |                                                                    | 0.8 |
| LINC02793       | Long Intergenic Non-Protein Coding RNA 2793                        | 0.8 |
| LINC02836       | Long Intergenic Non-Protein Coding RNA 2836                        | 0.8 |
| LINC02745       | Long Intergenic Non-Protein Coding RNA 2745                        | 0.8 |
| ENSG00000287658 |                                                                    | 0.8 |
| AURKBP1         | Aurora Kinase B Pseudogene 1                                       | 0.8 |
| lnc-CCDC68-5    |                                                                    | 0.8 |
| ENSG00000286084 |                                                                    | 0.8 |
| RN7SL614P       | RNA, 7SL, Cytoplasmic 614, Pseudogene                              | 0.8 |
| RNU6-351P       | RNA, U6 Small Nuclear 351, Pseudogene                              | 0.8 |
| DDX39BP2        | DEAD-Box Helicase 39B Pseudogene 2                                 | 0.8 |
| RPL24P7         | RPL24 Pseudogene 7                                                 | 0.8 |
| RNU6-929P       | RNA, U6 Small Nuclear 929, Pseudogene                              | 0.8 |
| ENSG00000227486 |                                                                    | 0.8 |
| ENSG00000239665 |                                                                    | 0.8 |
| ENSG00000223598 |                                                                    | 0.8 |
| ENSG00000205037 |                                                                    | 0.8 |
| ENSG00000219410 |                                                                    | 0.8 |
| NRBF2P4         | Nuclear Receptor Binding Factor 2 Pseudogene 4                     | 0.8 |
| ENSG00000231078 |                                                                    | 0.8 |
| ENSG00000229528 |                                                                    | 0.8 |
| ENSG00000254733 |                                                                    | 0.8 |
| ENSG00000257880 |                                                                    | 0.8 |
| PUDPP2          | Pseudouridine 5'-Phosphatase Pseudogene 2                          | 0.8 |
| KATNBL1P2       | Katanin Regulatory Subunit B1 Like 1 Pseudogene 2                  | 0.8 |
| ENSG00000247853 |                                                                    | 0.8 |
| PPP1R11P2       | Protein Phosphatase 1 Regulatory Inhibitor Subunit 11 Pseudogene 2 | 0.8 |
| ENSG00000257176 |                                                                    | 0.8 |
| RPL21P62        | Ribosomal Protein L21 Pseudogene 62                                | 0.8 |
| ENSG00000225214 |                                                                    | 0.8 |
| ENSG00000233755 |                                                                    | 0.8 |
| ENSG00000253796 |                                                                    | 0.8 |
| ENSG00000271382 |                                                                    | 0.8 |

|                 |                                                        |     |
|-----------------|--------------------------------------------------------|-----|
| ENSG00000271737 |                                                        | 0.8 |
| ENSG00000271811 |                                                        | 0.8 |
| ENSG00000272109 |                                                        | 0.8 |
| ENSG00000272221 |                                                        | 0.8 |
| ENSG00000272540 |                                                        | 0.8 |
| LINC01916       | Long Intergenic Non-Protein Coding RNA 1916            | 0.8 |
| ENSG00000261285 |                                                        | 0.8 |
| ENSG00000261468 |                                                        | 0.8 |
| ENSG00000262020 |                                                        | 0.8 |
| ENSG00000265554 |                                                        | 0.8 |
| ENSG00000259314 |                                                        | 0.8 |
| ENSG00000282246 |                                                        | 0.8 |
| ENSG00000264876 |                                                        | 0.8 |
| lnc-C17orf80-6  |                                                        | 0.8 |
| lnc-DFFA-7      |                                                        | 0.8 |
| CBX1P3          | Chromobox 1 Pseudogene 3                               | 0.8 |
| lnc-CCDC68-2    |                                                        | 0.8 |
| lnc-CCDC68-4    |                                                        | 0.8 |
| lnc-SCNN1A-1    |                                                        | 0.8 |
| BMI1P1          | BMI1 Proto-Oncogene, Polycomb Ring Finger Pseudogene 1 | 0.8 |
| LOC112268270    | Translation Initiation Factor IF-2-Like                | 0.8 |
| lnc-RNF145-1    |                                                        | 0.8 |
| lnc-CPSF4L-1    |                                                        | 0.8 |
| RN7SL592P       | RNA, 7SL, Cytoplasmic 592, Pseudogene                  | 0.8 |
| lnc-HLA-C-2     |                                                        | 0.8 |
| MTND1P31        | MT-ND1 Pseudogene 31                                   | 0.8 |
| LOC100420680    | Coiled-Coil Domain Containing 90B Pseudogene           | 0.8 |
| NANOGP9         | Nanog Homeobox Pseudogene 9                            | 0.8 |
| RNU6-1047P      | RNA, U6 Small Nuclear 1047, Pseudogene                 | 0.8 |
| piR-35448       |                                                        | 0.8 |
| ENSG00000228064 |                                                        | 0.8 |
| SALL4P5         | Spalt Like Transcription Factor 4 Pseudogene 5         | 0.8 |
| RPSAP25         | Ribosomal Protein SA Pseudogene 25                     | 0.8 |
| LOC105369246    | Uncharacterized LOC105369246                           | 0.8 |
| RPL21P24        | Ribosomal Protein L21 Pseudogene 24                    | 0.8 |
| ENSG00000234862 |                                                        | 0.8 |
| ENSG00000235972 |                                                        | 0.8 |
| ENSG00000230552 |                                                        | 0.8 |
| ENSG00000207411 |                                                        | 0.8 |
| LOC105369781    | Uncharacterized LOC105369781                           | 0.8 |
| ENSG00000248701 |                                                        | 0.8 |

|                 |                                                                                             |     |
|-----------------|---------------------------------------------------------------------------------------------|-----|
| LOC107984859    | Uncharacterized LOC107984859                                                                | 0.8 |
| ENSG00000249852 |                                                                                             | 0.8 |
| PGAM1P13        | Phosphoglycerate Mutase 1 Pseudogene 13                                                     | 0.8 |
| ENSG00000226861 |                                                                                             | 0.8 |
| lnc-NDRG1-7     |                                                                                             | 0.8 |
| lnc-PEX14-7     |                                                                                             | 0.8 |
| ENSG00000258379 |                                                                                             | 0.8 |
| ENSG00000278716 |                                                                                             | 0.8 |
| ENSG00000270322 |                                                                                             | 0.8 |
| ENSG00000271581 |                                                                                             | 0.8 |
| ENSG00000272054 |                                                                                             | 0.8 |
| ENSG00000273118 |                                                                                             | 0.8 |
| ENSG00000260118 |                                                                                             | 0.8 |
| ENSG00000261349 |                                                                                             | 0.8 |
| ENSG00000267101 |                                                                                             | 0.8 |
| ENSG00000269256 |                                                                                             | 0.8 |
| YWHAZP7         | Tyrosine 3-Monooxygenase/Tryptophan 5-Monooxygenase<br>Activation Protein Zeta Pseudogene 7 | 0.8 |
| ENSG00000287787 |                                                                                             | 0.8 |
| CCNYL5          | Cyclin Y Like 5 (Pseudogene)                                                                | 0.8 |
| lnc-THNSL1-1    |                                                                                             | 0.8 |
| RF00017-7879    |                                                                                             | 0.8 |
| piR-57133-098   |                                                                                             | 0.8 |
| lnc-CCDC88B-1   |                                                                                             | 0.8 |
| lnc-BRAP-1      |                                                                                             | 0.8 |
| lnc-RUNX3-2     |                                                                                             | 0.8 |
| RF00017-5977    |                                                                                             | 0.8 |
| lnc-CITED4-1    |                                                                                             | 0.8 |
| lnc-SRPRA-7     |                                                                                             | 0.8 |
| lnc-ATP2B3-2    |                                                                                             | 0.8 |
| lnc-BBOX1-10    |                                                                                             | 0.8 |
| lnc-BCL6-9      |                                                                                             | 0.8 |
| RF00017-4207    |                                                                                             | 0.8 |
| ENSG00000286046 |                                                                                             | 0.8 |
| lnc-CRTC3-1     |                                                                                             | 0.8 |
| piR-49657       |                                                                                             | 0.8 |
| RF00017-8481    |                                                                                             | 0.8 |
| RF00017-8483    |                                                                                             | 0.8 |
| piR-49294       |                                                                                             | 0.8 |
| lnc-GDPGP1-5    |                                                                                             | 0.8 |
| CTBP2P2         | CTBP2 Pseudogene 2                                                                          | 0.8 |

|                  |                                                          |     |
|------------------|----------------------------------------------------------|-----|
| lnc-VWA8-7       |                                                          | 0.8 |
| lnc-CA5A-8       |                                                          | 0.8 |
| lnc-CA5A-9       |                                                          | 0.8 |
| lnc-TNFRSF1A-1   |                                                          | 0.8 |
| lnc-TNFSF18-1    |                                                          | 0.8 |
| lnc-FAM92B-1     |                                                          | 0.8 |
| lnc-ULBP1-2      |                                                          | 0.8 |
| lnc-FAM19A2-2    |                                                          | 0.8 |
| MN298114-200     |                                                          | 0.8 |
| piR-50534        |                                                          | 0.8 |
| lnc-ICE2-2       |                                                          | 0.8 |
| lnc-ICE2-4       |                                                          | 0.8 |
| lnc-IL2RA-5      |                                                          | 0.8 |
| LOC100128362     | Protein Phosphatase 2 Catalytic Subunit Alpha Pseudogene | 0.8 |
| lnc-USPL1-2      |                                                          | 0.8 |
| lnc-UTP23-11     |                                                          | 0.8 |
| MN309431         |                                                          | 0.8 |
| MN309432         |                                                          | 0.8 |
| NONHSAG043472.2  |                                                          | 0.8 |
| ENSG00000237669  |                                                          | 0.8 |
| IFITM3P5         | IFITM3 Pseudogene 5                                      | 0.8 |
| RUNX3-AS1        | RUNX3 Antisense RNA 1                                    | 0.8 |
| HSALNG0096135    |                                                          | 0.8 |
| piR-45035-151    |                                                          | 0.8 |
| lnc-LHX2-3       |                                                          | 0.8 |
| piR-53177-032    |                                                          | 0.8 |
| lnc-KCNQ4-7      |                                                          | 0.8 |
| HSALNG0073495    |                                                          | 0.8 |
| lnc-JPH3-8       |                                                          | 0.8 |
| ENSG00000184115  |                                                          | 0.8 |
| lnc-KRTAP10-12-2 |                                                          | 0.8 |
| piR-47864        |                                                          | 0.8 |
| lnc-PPA2-10      |                                                          | 0.8 |
| lnc-PRDM1-7      |                                                          | 0.8 |
| lnc-PRKAR1B-1    |                                                          | 0.8 |
| ENSG00000252888  |                                                          | 0.8 |
| RF00017-1272     |                                                          | 0.8 |
| lnc-PLEKHG6-4    |                                                          | 0.8 |
| L13713-231       |                                                          | 0.8 |
| ENSG00000254755  |                                                          | 0.8 |
| RF00017-107      |                                                          | 0.8 |



|                 |                                                |     |
|-----------------|------------------------------------------------|-----|
| L13304-031      |                                                | 0.8 |
| piR-52740       |                                                | 0.8 |
| RSL24D1P7       | Ribosomal L24 Domain Containing 1 Pseudogene 7 | 0.8 |
| lnc-NDRG1-5     |                                                | 0.8 |
| ENSG00000253801 |                                                | 0.8 |
| ENSG00000278215 |                                                | 0.8 |
| ENSG00000271018 |                                                | 0.8 |
| ENSG00000271128 |                                                | 0.8 |
| ENSG00000271396 |                                                | 0.8 |
| ENSG00000273890 |                                                | 0.8 |
| piR-40666-013   |                                                | 0.8 |
| lnc-SNRPE-3     |                                                | 0.8 |
| RF00017-6267    |                                                | 0.8 |
| lnc-CCDC34-6    |                                                | 0.8 |
| ENSG00000288583 |                                                | 0.8 |
| ENSG00000287949 |                                                | 0.8 |
| ENSG00000287563 |                                                | 0.8 |
| FJ601684-136    |                                                | 0.8 |
| lnc-CLIC4-2     |                                                | 0.8 |
| 5MWI_A-080      |                                                | 0.8 |
| LOC112267915    | Uncharacterized LOC112267915                   | 0.8 |
| LOC112268088    | Uncharacterized LOC112268088                   | 0.8 |
| ENSG00000286147 |                                                | 0.8 |
| piR-33338       |                                                | 0.8 |
| RF00017-8487    |                                                | 0.8 |
| lnc-GALNT17-6   |                                                | 0.8 |
| piR-34749       |                                                | 0.8 |
| RF00998-117     |                                                | 0.8 |
| lnc-VGLL4-2     |                                                | 0.8 |
| lnc-VEZT-10     |                                                | 0.8 |
| piR-42741       |                                                | 0.8 |
| piR-50444-431   |                                                | 0.8 |
| lnc-TRMT11-2    |                                                | 0.8 |
| lnc-EHD3-4      |                                                | 0.8 |
| lnc-ZNF800-7    |                                                | 0.8 |
| HSALNG0021699   |                                                | 0.8 |
| HSALNG0122037   |                                                | 0.8 |
| piR-38120       |                                                | 0.8 |
| piR-38051-139   |                                                | 0.8 |
| PPIAP67         | Peptidylprolyl Isomerase A Pseudogene 67       | 0.8 |
| NONHSAG028935.2 |                                                | 0.8 |

|                     |                                         |     |
|---------------------|-----------------------------------------|-----|
| ENSG00000224981     |                                         | 0.8 |
| piR-61532-025       |                                         | 0.8 |
| HSALNG0109576       |                                         | 0.8 |
| NONHSAG042527.2     |                                         | 0.8 |
| ENSG00000213620     |                                         | 0.8 |
| NONHSAG020184.2-002 |                                         | 0.8 |
| piR-36830           |                                         | 0.8 |
| lnc-LIN28B-11       |                                         | 0.8 |
| HSALNG0133560       |                                         | 0.8 |
| HSALNG0133399       |                                         | 0.8 |
| HSALNG0131102       |                                         | 0.8 |
| LOC105369780        | Uncharacterized LOC105369780            | 0.8 |
| RF00017-178         |                                         | 0.8 |
| lnc-PPA2-9          |                                         | 0.8 |
| ENSG00000256378     |                                         | 0.8 |
| lnc-PRDX5-1         |                                         | 0.8 |
| lnc-PREP-5          |                                         | 0.8 |
| lnc-PRDM1-9         |                                         | 0.8 |
| TRMT10BP1           | TRNA Methyltransferase 10B Pseudogene 1 | 0.8 |
| LOC107984526        | Uncharacterized LOC107984526            | 0.8 |
| ENSG00000251473     |                                         | 0.8 |
| LOC107984500        | Uncharacterized LOC107984500            | 0.8 |
| piR-30444-140       |                                         | 0.8 |
| piR-52680-323       |                                         | 0.8 |
| HSALNG0014097       |                                         | 0.8 |
| piR-43106-108       |                                         | 0.8 |
| piR-52008-011       |                                         | 0.8 |
| piR-54575           |                                         | 0.8 |
| NONHSAG055547.2     |                                         | 0.8 |
| lnc-NDRG1-3         |                                         | 0.8 |
| piR-38051-325       |                                         | 0.8 |
| ENSG00000270838     |                                         | 0.8 |
| ENSG00000264131     |                                         | 0.8 |
| ENSG00000280154     |                                         | 0.8 |
| piR-31210-010       |                                         | 0.8 |
| ENSG00000259608     |                                         | 0.8 |
| piR-32214-114       |                                         | 0.8 |
| lnc-CASZ1-4         |                                         | 0.8 |
| piR-57133-593       |                                         | 0.8 |
| EOS                 | Eosinophilia, Familial                  | 0.8 |
| piR-39858-296       |                                         | 0.8 |

|                  |                                                     |     |
|------------------|-----------------------------------------------------|-----|
| RF00017-5252     |                                                     | 0.8 |
| RF00017-5981     |                                                     | 0.8 |
| lnc-SERPINB12-1  |                                                     | 0.8 |
| piR-32810-086    |                                                     | 0.8 |
| piR-57176-560    |                                                     | 0.8 |
| 5MWI_A-082       |                                                     | 0.8 |
| 5MWI_A-131       |                                                     | 0.8 |
| 5MWI_A-192       |                                                     | 0.8 |
| ENSG00000286383  |                                                     | 0.8 |
| ENSG00000286764  |                                                     | 0.8 |
| lnc-BIRC6-3      |                                                     | 0.8 |
| lnc-SUCNR1-4     |                                                     | 0.8 |
| lnc-CENPS-CORT-4 |                                                     | 0.8 |
| lnc-CENPS-CORT-5 |                                                     | 0.8 |
| piR-57133-629    |                                                     | 0.8 |
| piR-51671-059    |                                                     | 0.8 |
| lnc-ZC4H2-1      |                                                     | 0.8 |
| lnc-ZC3H12B-15   |                                                     | 0.8 |
| RF00994-1030     |                                                     | 0.8 |
| lnc-TRMT11-5     |                                                     | 0.8 |
| lnc-EMC2-8       |                                                     | 0.8 |
| lnc-EPG5-10      |                                                     | 0.8 |
| piR-42085-004    |                                                     | 0.8 |
| RF00994-258      |                                                     | 0.8 |
| lnc-EHD3-7       |                                                     | 0.8 |
| LOC100533843     | Karyopherin Subunit Alpha 2 Pseudogene              | 0.8 |
| LOC100509370     | 39S Ribosomal Protein L21, Mitochondrial Pseudogene | 0.8 |
| piR-50308-096    |                                                     | 0.8 |
| lnc-TMEM74-2     |                                                     | 0.8 |
| lnc-ZNRD1-3      |                                                     | 0.8 |
| MN298114-179     |                                                     | 0.8 |
| LOC101928096     | Uncharacterized LOC101928096                        | 0.8 |
| ENSG00000243016  |                                                     | 0.8 |
| HSALNG0122056    |                                                     | 0.8 |
| LOC105372813     | Uncharacterized LOC105372813                        | 0.8 |
| piR-45693        |                                                     | 0.8 |
| HSALNG0119956    |                                                     | 0.8 |
| piR-38051-285    |                                                     | 0.8 |
| SNODB804         |                                                     | 0.8 |
| LOC105377944     | Uncharacterized LOC105377944                        | 0.8 |
| ENSG00000216781  |                                                     | 0.8 |

|                                              |     |
|----------------------------------------------|-----|
| ENSG00000213148                              | 0.8 |
| lnc-LAS1L-5                                  | 0.8 |
| piR-45012-450                                | 0.8 |
| piR-45012-575                                | 0.8 |
| ENSG00000232765                              | 0.8 |
| LOC105374875    Uncharacterized LOC105374875 | 0.8 |
| hsa-miR-5095-290                             | 0.8 |
| piR-55194-088                                | 0.8 |
| piR-46501-096                                | 0.8 |
| piR-61945-117                                | 0.8 |
| HSALNG0131108                                | 0.8 |
| piR-36971                                    | 0.8 |
| piR-46932                                    | 0.8 |
| piR-30831-002                                | 0.8 |
| L13714-378                                   | 0.8 |
| ENSG00000257360                              | 0.8 |
| piR-39098-157                                | 0.8 |
| LOC107984830    Uncharacterized LOC107984830 | 0.8 |
| piR-30048-046                                | 0.8 |
| LOC107985712    Uncharacterized LOC107985712 | 0.8 |
| piR-38344-035                                | 0.8 |
| lnc-EIF3E-1                                  | 0.8 |
| HSALNG0036854                                | 0.8 |
| Hsa-Mir-544_3p-001                           | 0.8 |
| ENSG00000237971                              | 0.8 |
| ENSG00000276929                              | 0.8 |
| ENSG00000278104                              | 0.8 |
| ENSG00000279205                              | 0.8 |
| ENSG00000279499                              | 0.8 |
| ENSG00000270422                              | 0.8 |
| ENSG00000274075                              | 0.8 |
| ENSG00000236852                              | 0.8 |
| LOC105371689    Uncharacterized LOC105371689 | 0.8 |
| ENSG00000218175                              | 0.8 |
| piR-61945-538                                | 0.8 |
| ENSG00000231356                              | 0.8 |
| LOC107986047    Uncharacterized LOC107986047 | 0.8 |
| LOC107985966    Uncharacterized LOC107985966 | 0.8 |
| ENSG00000253262                              | 0.8 |
| ENSG00000226820                              | 0.8 |
| ENSG00000233710                              | 0.8 |

|                 |                                                                              |      |
|-----------------|------------------------------------------------------------------------------|------|
| ENSG00000278319 |                                                                              | 0.8  |
| ABCB1           | ATP Binding Cassette Subfamily B Member 1                                    | 0.73 |
| TUBB            | Tubulin Beta Class I                                                         | 0.73 |
| ESR2            | Estrogen Receptor 2                                                          | 0.7  |
| AKR1C4          | Aldo-Keto Reductase Family 1 Member C4                                       | 0.67 |
| DGAT1           | Diacylglycerol O-Acyltransferase 1                                           | 0.67 |
| PTGFR           | Prostaglandin F Receptor                                                     | 0.67 |
| ARNTL           | Aryl Hydrocarbon Receptor Nuclear Translocator Like                          | 0.67 |
| BAX             | BCL2 Associated X, Apoptosis Regulator                                       | 0.59 |
| TXNRD1          | Thioredoxin Reductase 1                                                      | 0.59 |
| LIFR            | LIF Receptor Subunit Alpha                                                   | 0.59 |
| AQP1            | Aquaporin 1 (Colton Blood Group)                                             | 0.59 |
| IL6ST           | Interleukin 6 Signal Transducer                                              | 0.59 |
| TIRAP           | TIR Domain Containing Adaptor Protein                                        | 0.59 |
| LAMA5           | Laminin Subunit Alpha 5                                                      | 0.59 |
| FGF18           | Fibroblast Growth Factor 18                                                  | 0.59 |
| SVIL            | Supervillin                                                                  | 0.59 |
| SHROOM3         | Shroom Family Member 3                                                       | 0.59 |
| CGB5            | Chorionic Gonadotropin Subunit Beta 5                                        | 0.59 |
| MIR203A         | MicroRNA 203a                                                                | 0.59 |
| LOC107880064    | IVL Promoter Region                                                          | 0.59 |
| TYMS            | Thymidylate Synthetase                                                       | 0.59 |
| DHODH           | Dihydroorotate Dehydrogenase (Quinone)                                       | 0.42 |
| CDK4            | Cyclin Dependent Kinase 4                                                    | 0.41 |
| SMO             | Smoothened, Frizzled Class Receptor                                          | 0.41 |
| CTBP1           | C-Terminal Binding Protein 1                                                 | 0.41 |
| COL4A1          | Collagen Type IV Alpha 1 Chain                                               | 0.41 |
| VCAN            | Versican                                                                     | 0.41 |
| PKP2            | Plakophilin 2                                                                | 0.41 |
| ANGPT2          | Angiopoietin 2                                                               | 0.41 |
| HSD3B1          | Hydroxy-Delta-5-Steroid Dehydrogenase, 3 Beta- And Steroid Delta-Isomerase 1 | 0.41 |
| LIF             | LIF Interleukin 6 Family Cytokine                                            | 0.41 |
| SRD5A3          | Steroid 5 Alpha-Reductase 3                                                  | 0.41 |
| OSM             | Oncostatin M                                                                 | 0.41 |
| GNRH1           | Gonadotropin Releasing Hormone 1                                             | 0.41 |
| IL11            | Interleukin 11                                                               | 0.41 |
| TGFB1I1         | Transforming Growth Factor Beta 1 Induced Transcript 1                       | 0.41 |
| CTF1            | Cardiotrophin 1                                                              | 0.41 |
| DSC1            | Desmocollin 1                                                                | 0.41 |
| TMEM135         | Transmembrane Protein 135                                                    | 0.41 |

|          |                                                                                       |      |
|----------|---------------------------------------------------------------------------------------|------|
| GSDMA    | Gasdermin A                                                                           | 0.41 |
| MPZL3    | Myelin Protein Zero Like 3                                                            | 0.41 |
| HSD17B13 | Hydroxysteroid 17-Beta Dehydrogenase 13                                               | 0.41 |
| IFNL1    | Interferon Lambda 1                                                                   | 0.41 |
| MIR22    | MicroRNA 22                                                                           | 0.41 |
| PDGFRB   | Platelet Derived Growth Factor Receptor Beta                                          | 0.33 |
| AREG     | Amphiregulin                                                                          | 0.33 |
| CDK2     | Cyclin Dependent Kinase 2                                                             | 0.27 |
| CBS      | Cystathionine Beta-Synthase                                                           | 0.27 |
| ABCC1    | ATP Binding Cassette Subfamily C Member 1                                             | 0.27 |
| ATIC     | 5-Aminoimidazole-4-Carboxamide Ribonucleotide<br>Formyltransferase/IMP Cyclohydrolase | 0.27 |
| DCK      | Deoxycytidine Kinase                                                                  | 0.27 |
| SHMT1    | Serine Hydroxymethyltransferase 1                                                     | 0.27 |
| FPGS     | Folylpolyglutamate Synthase                                                           | 0.27 |
| MAP2     | Microtubule Associated Protein 2                                                      | 0.27 |
| DPP8     | Dipeptidyl Peptidase 8                                                                | 0.27 |
| HSD3BP4  | Hydroxy-Delta-5-Steroid Dehydrogenase, 3 Beta, Pseudogene 4                           | 0.27 |
| HGF      | Hepatocyte Growth Factor                                                              | 0.19 |
| DPYD     | Dihydropyrimidine Dehydrogenase                                                       | 0.19 |
| ESRRB    | Estrogen Related Receptor Beta                                                        | 0.19 |
| ITGB1    | Integrin Subunit Beta 1                                                               | 0.19 |
| DHFR     | Dihydrofolate Reductase                                                               | 0.19 |
| TUBB3    | Tubulin Beta 3 Class III                                                              | 0.19 |
| F10      | Coagulation Factor X                                                                  | 0.19 |
| PRLR     | Prolactin Receptor                                                                    | 0.19 |
| GLI2     | GLI Family Zinc Finger 2                                                              | 0.19 |
| MC1R     | Melanocortin 1 Receptor                                                               | 0.19 |
| ECHS1    | Enoyl-CoA Hydratase, Short Chain 1                                                    | 0.19 |
| UBE2D3   | Ubiquitin Conjugating Enzyme E2 D3                                                    | 0.19 |
| CASP4    | Caspase 4                                                                             | 0.19 |
| BAD      | BCL2 Associated Agonist Of Cell Death                                                 | 0.19 |
| TRPV1    | Transient Receptor Potential Cation Channel Subfamily V Member<br>1                   | 0.19 |
| CD151    | CD151 Molecule (Raph Blood Group)                                                     | 0.19 |
| F13A1    | Coagulation Factor XIII A Chain                                                       | 0.19 |
| ABCC8    | ATP Binding Cassette Subfamily C Member 8                                             | 0.19 |
| DBI      | Diazepam Binding Inhibitor, Acyl-CoA Binding Protein                                  | 0.19 |
| NPY      | Neuropeptide Y                                                                        | 0.19 |
| HTR3A    | 5-Hydroxytryptamine Receptor 3A                                                       | 0.19 |
| NGFR     | Nerve Growth Factor Receptor                                                          | 0.19 |
| TJP2     | Tight Junction Protein 2                                                              | 0.19 |

|              |                                                        |      |
|--------------|--------------------------------------------------------|------|
| PCSK1        | Proprotein Convertase Subtilisin/Kexin Type 1          | 0.19 |
| STAMBP       | STAM Binding Protein                                   | 0.19 |
| CCNA2        | Cyclin A2                                              | 0.19 |
| FDXR         | Ferredoxin Reductase                                   | 0.19 |
| TCN2         | Transcobalamin 2                                       | 0.19 |
| CGA          | Glycoprotein Hormones, Alpha Polypeptide               | 0.19 |
| CD33         | CD33 Molecule                                          | 0.19 |
| PGF          | Placental Growth Factor                                | 0.19 |
| UGT1A9       | UDP Glucuronosyltransferase Family 1 Member A9         | 0.19 |
| CRHR2        | Corticotropin Releasing Hormone Receptor 2             | 0.19 |
| GGH          | Gamma-Glutamyl Hydrolase                               | 0.19 |
| GSTA1        | Glutathione S-Transferase Alpha 1                      | 0.19 |
| GSTM1        | Glutathione S-Transferase Mu 1                         | 0.19 |
| SRF          | Serum Response Factor                                  | 0.19 |
| PCSK2        | Proprotein Convertase Subtilisin/Kexin Type 2          | 0.19 |
| DLX3         | Distal-Less Homeobox 3                                 | 0.19 |
| FDX1         | Ferredoxin 1                                           | 0.19 |
| CD58         | CD58 Molecule                                          | 0.19 |
| DPP7         | Dipeptidyl Peptidase 7                                 | 0.19 |
| CRHBP        | Corticotropin Releasing Hormone Binding Protein        | 0.19 |
| PCSK6        | Proprotein Convertase Subtilisin/Kexin Type 6          | 0.19 |
| SOD3         | Superoxide Dismutase 3                                 | 0.19 |
| NTS          | Neurotensin                                            | 0.19 |
| KCNK4        | Potassium Two Pore Domain Channel Subfamily K Member 4 | 0.19 |
| CD160        | CD160 Molecule                                         | 0.19 |
| GSDMD        | Gasdermin D                                            | 0.19 |
| SCG5         | Secretogranin V                                        | 0.19 |
| ASIP         | Agouti Signaling Protein                               | 0.19 |
| CKAP4        | Cytoskeleton Associated Protein 4                      | 0.19 |
| SOCS4        | Suppressor Of Cytokine Signaling 4                     | 0.19 |
| CARD16       | Caspase Recruitment Domain Family Member 16            | 0.19 |
| OVOL2        | Ovo Like Zinc Finger 2                                 | 0.19 |
| OVOL1        | Ovo Like Transcriptional Repressor 1                   | 0.19 |
| GPR137       | G Protein-Coupled Receptor 137                         | 0.19 |
| GSTT1        | Glutathione S-Transferase Theta 1                      | 0.19 |
| CEP43        | Centrosomal Protein 43                                 | 0.19 |
| LOC108228200 | Xe1 Enhancer Downstream Of PAX1                        | 0.19 |
| LOC108228202 | PEC7 Enhancer Downstream Of PAX1                       | 0.19 |
