# Supplementary material for: Network Pharmacology Study and Experimental Confirmation Revealing the Ameliorative Effects of Decursin on Chemotherapy-Induced Alopecia
Source: MDPI journal article supplement (doi:10.3390/ph14111150), 2021-11-11
Supplement: s1 [file s1]

**Table S1.** Gene targets of Decursin derived from PubChem open database.

| Compound Name | Gene Symbol   | Gene Name                                                              |
|---------------|---------------|------------------------------------------------------------------------|
| Decursin      | CYCD1;1       | cyclin-d1-1                                                            |
|               | VEGFA         | vascular endothelial growth factor a                                   |
|               | CASP3.2.S     | caspase-3                                                              |
|               | PARP          | poly (adp-ribose) polymerase                                           |
|               | BCL2          | bcl2 apoptosis regulator                                               |
|               | AR            | androgen receptor                                                      |
|               | KDR           | kinase insert domain receptor                                          |
|               | BIRC5         | baculoviral iap repeat containing 5                                    |
|               | CASP8         | caspase 8                                                              |
|               | IL-6          | interleukin-6                                                          |
|               | EC:2.7.11.24  | mitogen-activated protein kinase                                       |
|               | PRKCQ         | protein kinase c theta                                                 |
|               | HMOX1         | heme oxygenase 1                                                       |
|               | EC:1.14.14.1  | unspecific monooxygenase                                               |
|               | STAT3         | signal transducer and activator of transcription 3                     |
|               | MSMP          | microseminoprotein, prostate associated                                |
|               | EC:1.14.13.11 | trans-cinnamate 4-monooxygenase                                        |
|               | CYP2J2        | cytochrome p450 family 2 subfamily j member 2                          |
|               | EC:2.4.2.30   | nad(+) adp-ribosyltransferase                                          |
|               | EC:3.4.21.77  | semenogelase                                                           |
|               | CASP9         | caspase 9                                                              |
|               | MYC           | myc proto-oncogene, bhlh transcription factor                          |
|               | TNF           | tumor necrosis factor                                                  |
|               | MAPK14        | mitogen-activated protein kinase 14                                    |
|               | CTNNB1        | catenin beta 1                                                         |
|               | WNT3A         | wnt family member 3a                                                   |
|               | AKT1          | akt serine/threonine kinase 1                                          |
|               | MAPK8         | mitogen-activated protein kinase 8                                     |
|               | NFATC1        | nuclear factor of activated t cells 1                                  |
|               | CXCL8         | c-x-c motif chemokine ligand 8                                         |
|               | CCL11         | c-c motif chemokine ligand 11                                          |
|               | MAOA          | monoamine oxidase a                                                    |
|               | ATF4          | activating transcription factor 4                                      |
|               | EC:4.3.1.24   | phenylalanine ammonia-lyase                                            |
|               | EC:1.11.1.9   | glutathione peroxidase                                                 |
|               | CASP7         | caspase 7                                                              |
|               | PIK3CA        | phosphatidylinositol-4,5-bisphosphate 3-kinase catalytic subunit alpha |
|               | CDK4          | cyclin dependent kinase 4                                              |
|               | HMGB1         | high mobility group box 1                                              |
|               | TNFSF11       | tnf superfamily member 11                                              |
|               | CYP1A2        | cytochrome p450 family 1 subfamily a member 2                          |
|               | PRPF4B        | pre-mrna processing factor 4b                                          |
|               | FASN          | fatty acid synthase                                                    |
|               | EC:3.4.24.35  | gelatinase b                                                           |

---

|              |                                                           |
|--------------|-----------------------------------------------------------|
| IL13         | interleukin 13                                            |
| JAK2         | janus kinase 2                                            |
| CYP2D15      | cytochrome p450 2d15                                      |
| TYR          | tyrosinase                                                |
| MCP-1        | corticostatin-3                                           |
| EC:1.15.1.1  | superoxide dismutase                                      |
| EC:2.4.1.21  | starch synthase                                           |
| BCL2L1       | bcl2 like 1                                               |
| MAPK15       | mitogen-activated protein kinase 15                       |
| TLR4         | toll like receptor 4                                      |
| HIF1A        | hypoxia inducible factor 1 subunit alpha                  |
| CYP3A12      | cytochrome p450 3a12                                      |
| PTGS2        | prostaglandin-endoperoxide synthase 2                     |
| MAPK4        | mitogen-activated protein kinase 4                        |
| IL4          | interleukin 4                                             |
| CCK          | cholecystokinin                                           |
| DCSTAMP      | dendrocyte expressed seven transmembrane protein          |
| LATS1        | large tumor suppressor kinase 1                           |
| NKX3-1       | nk3 homeobox 1                                            |
| MTOR         | mechanistic target of rapamycin kinase                    |
| ITGAM        | integrin subunit alpha m                                  |
| TJP2         | tight junction protein 2                                  |
| EC:1.13.12.8 | watasenia-luciferin 2-monooxygenase                       |
| LOC443319    | chorionic somatomammotropin hormone                       |
| CES2         | carboxylesterase 2                                        |
| 2A6          | 1-aminocyclopropane-1-carboxylate oxidase homolog 5       |
| KAT3         | potassium channel kat3                                    |
| CCL17        | c-c motif chemokine ligand 17                             |
| OSM1         | fumarate reductase                                        |
| CES1         | carboxylesterase 1                                        |
| MITF         | melanocyte inducing transcription factor                  |
| FLK          | flagellar regulator flk                                   |
| LMNA         | lamin a/c                                                 |
| ANGPT2       | angiopoietin 2                                            |
| DDX53        | dead-box helicase 53                                      |
| CDK-4        | cyclin-dependent kinase 4 homolog                         |
| CDK6         | cyclin dependent kinase 6                                 |
| PIN1         | peptidylprolyl cis/trans isomerase, nima-interacting 1    |
| NRK          | nik related kinase                                        |
| ACAT1        | acetyl-coa acetyltransferase 1                            |
| EC:1.6.3.1   | nad(p)h oxidase (h(2)o(2)-forming)                        |
| TEK          | tek receptor tyrosine kinase                              |
| EIF2AK2      | eukaryotic translation initiation factor 2 alpha kinase 2 |
| PKCDELTA     | putative protein kinase c delta type homolog              |
| GAD2         | glutamate decarboxylase 2                                 |
| TLR9         | toll like receptor 9                                      |
| PTPN11       | protein tyrosine phosphatase non-receptor type 11         |
| KIP1         | kinesin-like protein kip1                                 |
| TNFRSF10B    | tnf receptor superfamily member 10b                       |
| EC:2.3.1.85  | fatty-acid synthase                                       |

---

---

|         |                                |
|---------|--------------------------------|
| TLR3    | toll like receptor 3           |
| TPM3    | tropomyosin 3                  |
| RETN    | resistin                       |
| RPS6KB1 | ribosomal protein s6 kinase b1 |

---
